# Supplementary material for: The Population Divergence and Genetic Basis of Local Adaptation of Wild Soybean (Glycine soja) in China
Source: MDPI journal article supplement (doi:10.3390/plants12244128), 2023-12-11

Figure S1. Cross-validation plot for different K values.

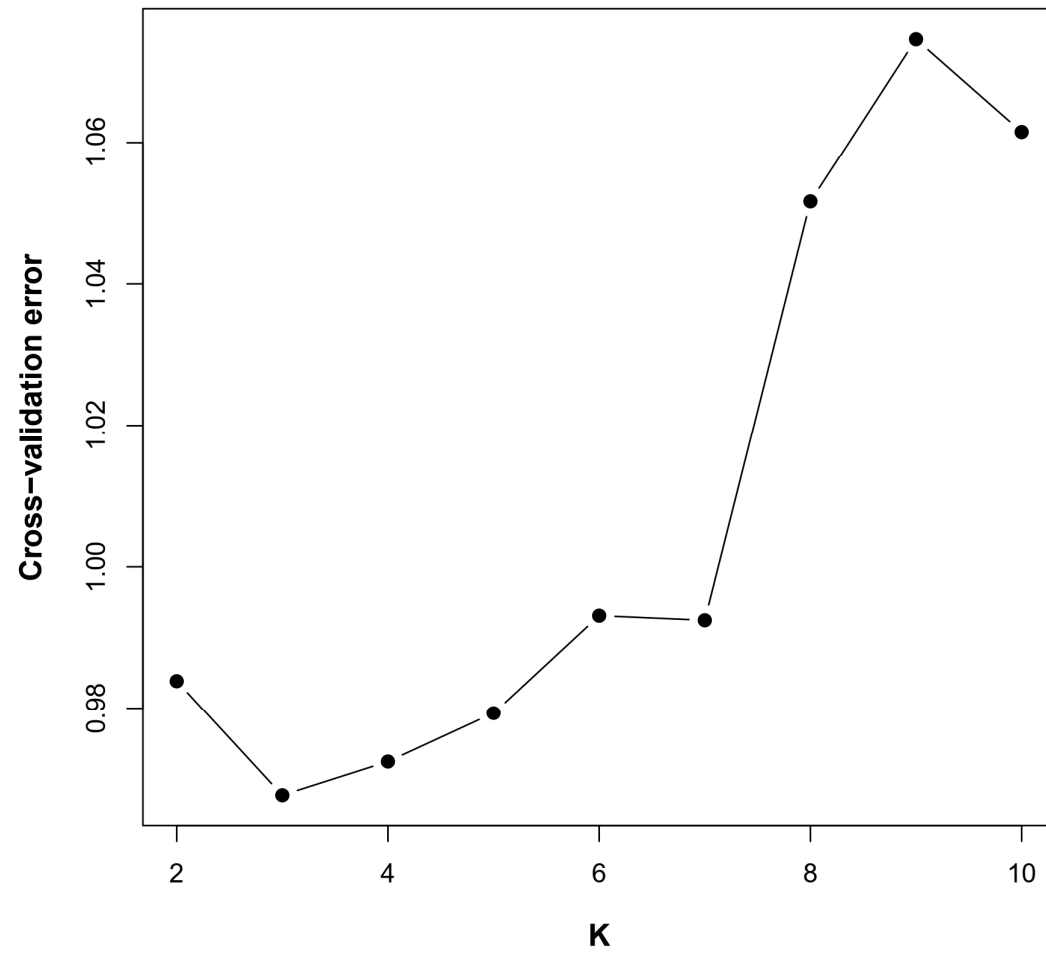

Figure S2. GPS coordinates of the 16 sampling locations.

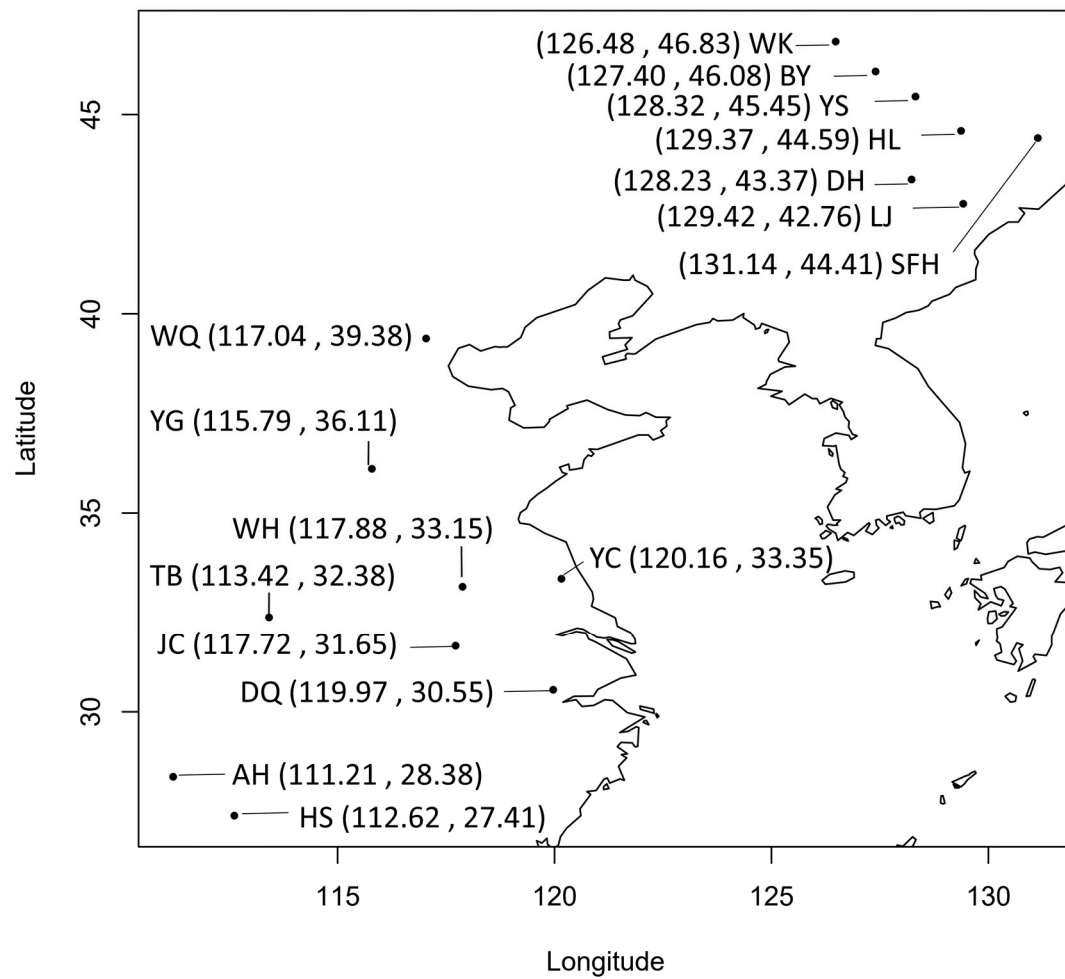

Supplement: s1 [file s1]
