# Supplementary material for: The Population Divergence and Genetic Basis of Local Adaptation of Wild Soybean (Glycine soja) in China
Source: MDPI journal article supplement (doi:10.3390/plants12244128), 2023-12-11
Supplement: s1 [file s1]

**Table S1. Information of 72 *G. soja* accessions.**

| Location ID | Library ID | accession | Eco-region | Location              | Latitude | Longitude |
|-------------|------------|-----------|------------|-----------------------|----------|-----------|
| YS          | 301        | YS175     | NER        | Yanshou, Heilongjiang | 45.45    | 128.32    |
| YS          | 302        | YS164     | NER        | Yanshou, Heilongjiang | 45.45    | 128.32    |
| YS          | 303        | YS157     | NER        | Yanshou, Heilongjiang | 45.45    | 128.32    |
| YS          | 304        | YS191     | NER        | Yanshou, Heilongjiang | 45.45    | 128.32    |
| YS          | 305        | YS197     | NER        | Yanshou, Heilongjiang | 45.45    | 128.32    |
| HL          | 306        | HL267     | NER        | Hailin, Heilongjiang  | 44.59    | 129.37    |
| HL          | 307        | HL258     | NER        | Hailin, Heilongjiang  | 44.59    | 129.37    |
| HL          | 308        | HL253     | NER        | Hailin, Heilongjiang  | 44.59    | 129.37    |
| HL          | 309        | HL251     | NER        | Hailin, Heilongjiang  | 44.59    | 129.37    |
| HL          | 310        | HL254     | NER        | Hailin, Heilongjiang  | 44.59    | 129.37    |
| BY          | 311        | BY193     | NER        | Bayan, Heilongjiang   | 46.08    | 127.4     |
| BY          | 312        | BY180     | NER        | Bayan, Heilongjiang   | 46.08    | 127.4     |
| BY          | 313        | BY213     | NER        | Bayan, Heilongjiang   | 46.08    | 127.4     |
| BY          | 314        | BY137     | NER        | Bayan, Heilongjiang   | 46.08    | 127.4     |
| BY          | 315        | BY145     | NER        | Bayan, Heilongjiang   | 46.08    | 127.4     |
| TB          | 316        | TB149     | SR         | Tongbai, Henan        | 32.38    | 113.42    |
| TB          | 318        | TB138     | SR         | Tongbai, Henan        | 32.38    | 113.42    |
| TB          | 319        | TB144     | SR         | Tongbai, Henan        | 32.38    | 113.42    |
| TB          | 320        | TB136     | SR         | Tongbai, Henan        | 32.38    | 113.42    |
| WQ          | 321        | WQ056     | CR         | Wuqing, Tianjin       | 39.38    | 117.04    |
| WQ          | 323        | WQ112     | CR         | Wuqing, Tianjin       | 39.38    | 117.04    |
| WQ          | 324        | WQ121     | CR         | Wuqing, Tianjin       | 39.38    | 117.04    |
| WQ          | 325        | WQ001     | CR         | Wuqing, Tianjin       | 39.38    | 117.04    |
| WK          | 326        | WK006     | NER        | Wangkui, Heilongjiang | 46.83    | 126.48    |
| WK          | 327        | WK001     | NER        | Wangkui, Heilongjiang | 46.83    | 126.48    |
| WK          | 328        | WK004     | NER        | Wangkui, Heilongjiang | 46.83    | 126.48    |
| WK          | 329        | WK003     | NER        | Wangkui, Heilongjiang | 46.83    | 126.48    |
| WK          | 330        | WK002     | NER        | Wangkui, Heilongjiang | 46.83    | 126.48    |
| DQ          | 331        | DQ2512    | SR         | Deqing, Zhejiang      | 30.55    | 119.97    |
| DQ          | 332        | DQ2499    | SR         | Deqing, Zhejiang      | 30.55    | 119.97    |
| DQ          | 333        | DQ2528    | SR         | Deqing, Zhejiang      | 30.55    | 119.97    |
| DQ          | 334        | DQ2526    | SR         | Deqing, Zhejiang      | 30.55    | 119.97    |
| DQ          | 335        | DQ2561    | SR         | Deqing, Zhejiang      | 30.55    | 119.97    |
| AH          | 336        | AH076     | SR         | Anhua, Hunan          | 28.38    | 111.21    |
| AH          | 337        | AH055     | SR         | Anhua, Hunan          | 28.38    | 111.21    |
| AH          | 338        | AH024     | SR         | Anhua, Hunan          | 28.38    | 111.21    |
| AH          | 339        | AH008     | SR         | Anhua, Hunan          | 28.38    | 111.21    |
| JC          | 341        | JC2714    | SR         | Jucao, Anhui          | 31.65    | 117.72    |
| JC          | 342        | JC2700    | SR         | Jucao, Anhui          | 31.65    | 117.72    |
| JC          | 343        | JC2706    | SR         | Jucao, Anhui          | 31.65    | 117.72    |

|     |     |        |     |                        |       |        |
|-----|-----|--------|-----|------------------------|-------|--------|
| JC  | 344 | JC2702 | SR  | Jucao, Anhui           | 31.65 | 117.72 |
| JC  | 345 | JC2722 | SR  | Jucao, Anhui           | 31.65 | 117.72 |
| SFH | 346 | SFH363 | NER | Suifenhe, Heilongjiang | 44.41 | 131.14 |
| SFH | 347 | SFH362 | NER | Suifenhe, Heilongjiang | 44.41 | 131.14 |
| SFH | 348 | SFH358 | NER | Suifenhe, Heilongjiang | 44.41 | 131.14 |
| SFH | 349 | SFH354 | NER | Suifenhe, Heilongjiang | 44.41 | 131.14 |
| SFH | 350 | SHH356 | NER | Suifenhe, Heilongjiang | 44.41 | 131.14 |
| HS  | 352 | HS055  | SR  | Hengshan, Hunan        | 27.41 | 112.62 |
| HS  | 353 | HS003  | SR  | Hengshan, Hunan        | 27.41 | 112.62 |
| WH  | 356 | WH0038 | CR  | Wuhe, Anhui            | 33.15 | 117.88 |
| WH  | 357 | WH054  | CR  | Wuhe, Anhui            | 33.15 | 117.88 |
| WH  | 358 | WH0039 | CR  | Wuhe, Anhui            | 33.15 | 117.88 |
| WH  | 359 | WH060  | CR  | Wuhe, Anhui            | 33.15 | 117.88 |
| WH  | 360 | WH0020 | CR  | Wuhe, Anhui            | 33.15 | 117.88 |
| YC  | 361 | YC2517 | CR  | Yancheng, Jiangsu      | 33.35 | 120.16 |
| YC  | 362 | YC2592 | CR  | Yancheng, Jiangsu      | 33.35 | 120.16 |
| YC  | 363 | YC2591 | CR  | Yancheng, Jiangsu      | 33.35 | 120.16 |
| YC  | 364 | YC2595 | CR  | Yancheng, Jiangsu      | 33.35 | 120.16 |
| YC  | 365 | YC2610 | CR  | Yancheng, Jiangsu      | 33.35 | 120.16 |
| YG  | 366 | YG044  | CR  | Yanggu, Shandong       | 36.11 | 115.79 |
| YG  | 367 | YG036  | CR  | Yanggu, Shandong       | 36.11 | 115.79 |
| YG  | 368 | YG051  | CR  | Yanggu, Shandong       | 36.11 | 115.79 |
| YG  | 369 | YG049  | CR  | Yanggu, Shandong       | 36.11 | 115.79 |
| YG  | 370 | YG052  | CR  | Yanggu, Shandong       | 36.11 | 115.79 |
| LJ  | 388 | LJ075  | NER | Longjing, Jilin        | 42.76 | 129.42 |
| LJ  | 389 | LJ081  | NER | Longjing, Jilin        | 42.76 | 129.42 |
| LJ  | 390 | LJ100  | NER | Longjing, Jilin        | 42.76 | 129.42 |
| LJ  | 391 | LJ084  | NER | Longjing, Jilin        | 42.76 | 129.42 |
| LJ  | 392 | LJ090  | NER | Longjing, Jilin        | 42.76 | 129.42 |
| DH  | 394 | DH396  | NER | Dunhua, Jilin          | 43.37 | 128.23 |
| DH  | 395 | DH391  | NER | Dunhua, Jilin          | 43.37 | 128.23 |
| DH  | 396 | DH399  | NER | Dunhua, Jilin          | 43.37 | 128.23 |

Table S2. Mean genetic distance between locations.

|     | HS    | AH    | DQ    | JC    | TB    | WH    | YC    | YG    | WQ    | LJ    | DH    | SFH   | HL    | YS    | BY    |
|-----|-------|-------|-------|-------|-------|-------|-------|-------|-------|-------|-------|-------|-------|-------|-------|
| HS  |       |       |       |       |       |       |       |       |       |       |       |       |       |       |       |
| AH  | 0.232 |       |       |       |       |       |       |       |       |       |       |       |       |       |       |
| DQ  | 0.257 | 0.264 |       |       |       |       |       |       |       |       |       |       |       |       |       |
| JC  | 0.267 | 0.279 | 0.266 |       |       |       |       |       |       |       |       |       |       |       |       |
| TB  | 0.258 | 0.269 | 0.264 | 0.268 |       |       |       |       |       |       |       |       |       |       |       |
| WH  | 0.299 | 0.304 | 0.288 | 0.309 | 0.275 |       |       |       |       |       |       |       |       |       |       |
| YC  | 0.304 | 0.308 | 0.291 | 0.312 | 0.276 | 0.204 |       |       |       |       |       |       |       |       |       |
| YG  | 0.310 | 0.316 | 0.294 | 0.317 | 0.277 | 0.201 | 0.194 |       |       |       |       |       |       |       |       |
| WQ  | 0.303 | 0.311 | 0.287 | 0.312 | 0.264 | 0.194 | 0.189 | 0.166 |       |       |       |       |       |       |       |
| LJ  | 0.291 | 0.297 | 0.287 | 0.283 | 0.291 | 0.319 | 0.322 | 0.325 | 0.316 |       |       |       |       |       |       |
| DH  | 0.293 | 0.302 | 0.287 | 0.285 | 0.291 | 0.322 | 0.326 | 0.329 | 0.319 | 0.236 |       |       |       |       |       |
| SFH | 0.275 | 0.288 | 0.279 | 0.269 | 0.279 | 0.309 | 0.312 | 0.311 | 0.306 | 0.228 | 0.211 |       |       |       |       |
| HL  | 0.283 | 0.298 | 0.283 | 0.281 | 0.288 | 0.316 | 0.319 | 0.319 | 0.314 | 0.239 | 0.224 | 0.193 |       |       |       |
| YS  | 0.279 | 0.291 | 0.280 | 0.273 | 0.281 | 0.311 | 0.315 | 0.314 | 0.307 | 0.238 | 0.217 | 0.178 | 0.197 |       |       |
| BY  | 0.286 | 0.295 | 0.282 | 0.275 | 0.281 | 0.308 | 0.307 | 0.311 | 0.305 | 0.267 | 0.260 | 0.245 | 0.258 | 0.248 |       |
| WK  | 0.284 | 0.296 | 0.281 | 0.278 | 0.285 | 0.313 | 0.314 | 0.317 | 0.309 | 0.262 | 0.262 | 0.248 | 0.260 | 0.250 | 0.212 |

**Table S3. Selective sweeps between different G.soja groups.**

| <b>Chromosome</b> | <b>Start</b> | <b>End</b> | <b>Comparison</b> |
|-------------------|--------------|------------|-------------------|
| Gs05              | 10800001     | 11300000   | CR vs. NER        |
| Gs05              | 11700001     | 12200000   | CR vs. NER        |
| Gs05              | 13400001     | 14100000   | CR vs. NER        |
| Gs05              | 17500001     | 18500000   | CR vs. NER        |
| Gs05              | 22300001     | 22900000   | CR vs. NER        |
| Gs06              | 22600001     | 23500000   | CR vs. NER        |
| Gs06              | 25400001     | 25900000   | CR vs. NER        |
| Gs06              | 27400001     | 28100000   | CR vs. NER        |
| Gs06              | 28600001     | 29100000   | CR vs. NER        |
| Gs07              | 30800001     | 31300000   | CR vs. NER        |
| Gs07              | 33300001     | 34200000   | CR vs. NER        |
| Gs08              | 38200001     | 38700000   | CR vs. NER        |
| Gs09              | 12800001     | 13500000   | CR vs. NER        |
| Gs09              | 13700001     | 14500000   | CR vs. NER        |
| Gs09              | 16900001     | 17500000   | CR vs. NER        |
| Gs09              | 17600001     | 18600000   | CR vs. NER        |
| Gs09              | 24300001     | 24800000   | CR vs. NER        |
| Gs09              | 27100001     | 27600000   | CR vs. NER        |
| Gs10              | 32600001     | 33300000   | CR vs. NER        |
| Gs11              | 24800001     | 26100000   | CR vs. NER        |
| Gs14              | 17200001     | 17700000   | CR vs. NER        |
| Gs14              | 20400001     | 21000000   | CR vs. NER        |
| Gs14              | 22500001     | 23000000   | CR vs. NER        |
| Gs14              | 24600001     | 25300000   | CR vs. NER        |
| Gs14              | 26300001     | 27100000   | CR vs. NER        |
| Gs15              | 47300001     | 47900000   | CR vs. NER        |
| Gs17              | 27100001     | 27600000   | CR vs. NER        |
| Gs19              | 28100001     | 29300000   | CR vs. NER        |
| Gs19              | 29400001     | 30100000   | CR vs. NER        |
| Gs05              | 17900001     | 18500000   | CR vs. SR         |
| Gs05              | 18800001     | 19300000   | CR vs. SR         |
| Gs05              | 20400001     | 21200000   | CR vs. SR         |
| Gs06              | 22700001     | 23200000   | CR vs. SR         |
| Gs06              | 23400001     | 24000000   | CR vs. SR         |
| Gs06              | 24300001     | 24900000   | CR vs. SR         |
| Gs06              | 27800001     | 28400000   | CR vs. SR         |
| Gs06              | 28600001     | 29100000   | CR vs. SR         |
| Gs07              | 23500001     | 24400000   | CR vs. SR         |
| Gs09              | 12800001     | 14500000   | CR vs. SR         |
| Gs09              | 16900001     | 17400000   | CR vs. SR         |
| Gs09              | 24000001     | 24600000   | CR vs. SR         |

|      |          |          |            |
|------|----------|----------|------------|
| Gs09 | 25900001 | 26600000 | CR vs. SR  |
| Gs14 | 16900001 | 17700000 | CR vs. SR  |
| Gs14 | 27400001 | 28000000 | CR vs. SR  |
| Gs14 | 44800001 | 45300000 | CR vs. SR  |
| Gs18 | 30100001 | 30600000 | CR vs. SR  |
| Gs19 | 11900001 | 12400000 | CR vs. SR  |
| Gs19 | 27400001 | 27900000 | CR vs. SR  |
| Gs19 | 28500001 | 29400000 | CR vs. SR  |
| Gs19 | 29500001 | 30300000 | CR vs. SR  |
| Gs19 | 30500001 | 31000000 | CR vs. SR  |
| Gs19 | 37600001 | 38300000 | CR vs. SR  |
| Gs20 | 29000001 | 29500000 | CR vs. SR  |
| Gs01 | 16600001 | 17300000 | NER vs. SR |
| Gs01 | 21100001 | 21900000 | NER vs. SR |
| Gs02 | 27100001 | 27600000 | NER vs. SR |
| Gs03 | 25100001 | 25600000 | NER vs. SR |
| Gs04 | 33500001 | 34000000 | NER vs. SR |
| Gs04 | 34400001 | 34900000 | NER vs. SR |
| Gs04 | 43800001 | 44300000 | NER vs. SR |
| Gs06 | 20100001 | 20600000 | NER vs. SR |
| Gs09 | 10300001 | 10900000 | NER vs. SR |
| Gs09 | 21700001 | 22200000 | NER vs. SR |
| Gs10 | 17500001 | 18000000 | NER vs. SR |
| Gs10 | 18200001 | 19100000 | NER vs. SR |
| Gs10 | 19700001 | 20400000 | NER vs. SR |
| Gs10 | 20700001 | 24000000 | NER vs. SR |
| Gs10 | 31200001 | 31700000 | NER vs. SR |
| Gs11 | 7800001  | 8300000  | NER vs. SR |
| Gs11 | 25800001 | 26400000 | NER vs. SR |
| Gs12 | 10000001 | 10800000 | NER vs. SR |
| Gs13 | 21700001 | 22200000 | NER vs. SR |
| Gs13 | 22200001 | 23100000 | NER vs. SR |
| Gs14 | 10700001 | 11200000 | NER vs. SR |
| Gs14 | 20400001 | 21000000 | NER vs. SR |
| Gs14 | 22000001 | 23000000 | NER vs. SR |
| Gs14 | 24600001 | 25100000 | NER vs. SR |
| Gs14 | 25400001 | 26000000 | NER vs. SR |
| Gs14 | 26200001 | 27100000 | NER vs. SR |
| Gs14 | 28600001 | 29100000 | NER vs. SR |
| Gs14 | 31300001 | 31800000 | NER vs. SR |
| Gs14 | 31900001 | 32600000 | NER vs. SR |
| Gs14 | 39800001 | 40300000 | NER vs. SR |
| Gs15 | 23600001 | 24300000 | NER vs. SR |

|      |          |          |            |
|------|----------|----------|------------|
| Gs15 | 39500001 | 40400000 | NER vs. SR |
| Gs15 | 47100001 | 47900000 | NER vs. SR |
| Gs16 | 22000001 | 22500000 | NER vs. SR |
| Gs17 | 27000001 | 33000000 | NER vs. SR |
| Gs17 | 19300001 | 20300000 | NER vs. SR |
| Gs17 | 21900001 | 22500000 | NER vs. SR |
| Gs18 | 13800001 | 14500000 | NER vs. SR |
| Gs18 | 14700001 | 15300000 | NER vs. SR |
| Gs18 | 17000001 | 17900000 | NER vs. SR |
| Gs18 | 22800001 | 23400000 | NER vs. SR |
| Gs18 | 34100001 | 34600000 | NER vs. SR |
| Gs18 | 34700001 | 35200000 | NER vs. SR |
| Gs18 | 37400001 | 38200000 | NER vs. SR |
| Gs18 | 38500001 | 39100000 | NER vs. SR |
| Gs19 | 17400001 | 18000000 | NER vs. SR |
| Gs19 | 19200001 | 19800000 | NER vs. SR |
| Gs20 | 19600001 | 20100000 | NER vs. SR |
