# Supplementary material for: The Population Divergence and Genetic Basis of Local Adaptation of Wild Soybean (Glycine soja) in China
Source: Plants (Basel). 2023 Dec 11;12(24):4128. doi: 10.3390/plants12244128 (PMC10747053; doi:10.3390/plants12244128)
Supplement: Supplementary file 1 [file plants-12-04128-s001.zip › Supplementary Dataset.xlsx]

## Sheet: S1
Dataset S1. SALs for annual mean temperature.
Chromosome	Start	End	p-value (the most significant SNP)
Gs01	6691476	6891560	1.10156e-10
Gs01	7494900	7695032	9.4777e-07
Gs01	13373865	13573865	2.98902e-07
Gs01	29984997	30184997	7.11855e-08
Gs01	39102485	39302485	1.309e-06
Gs01	52484741	52684741	9.98863e-10
Gs02	4972765	5172765	2.81465e-07
Gs02	13343453	13543476	3.00374e-07
Gs02	18414822	18614841	1.70035e-10
Gs02	19773492	19973492	1.03936e-08
Gs02	20005277	20205277	2.52821e-08
Gs02	23066422	23266422	1.25119e-07
Gs02	26205913	26405913	4.50006e-07
Gs02	30751736	30951850	1.14503e-07
Gs02	37869217	38069217	1.2318e-07
Gs04	10445364	10645364	3.85789e-07
Gs04	32831968	33032086	3.86495e-10
Gs04	33921130	34121292	2.61934e-09
Gs04	47965508	48165508	1.87848e-07
Gs05	8163117	8363117	1.79196e-09
Gs05	30864869	31064869	9.70578e-08
Gs05	38923467	39123524	1.99359e-09
Gs06	8859388	9059388	8.78876e-07
Gs06	11298979	11498979	7.00866e-09
Gs06	34754296	34954296	1.00187e-06
Gs08	17994333	18194356	1.0425e-10
Gs08	34371073	34571073	4.73391e-07
Gs08	39122495	39322495	1.30049e-07
Gs08	45761044	45961044	5.70197e-08
Gs09	5218837	5418837	1.20152e-09
Gs09	17484048	17684048	5.02184e-10
Gs09	46642743	46842743	2.24933e-07
Gs09	47056975	47256975	6.26123e-07
Gs10	7082290	7282290	5.25624e-11
Gs10	8038833	8238833	2.09987e-08
Gs10	11957144	12157144	5.09483e-07
Gs10	23583639	23783639	1.25182e-06
Gs10	38312469	38512469	3.56539e-07
Gs10	51529508	51729509	4.02876e-09
Gs11	28829180	29029180	1.01531e-08
Gs11	33789546	33989546	1.00934e-06
Gs12	20465215	20665252	9.47266e-07
Gs12	23470155	23670155	8.94559e-07
Gs12	39785004	39985004	6.35905e-08
Gs13	1751581	1951613	1.43001e-08
Gs13	4421991	4621993	3.64851e-07
Gs13	15709694	15909694	3.05368e-08
Gs13	21655596	21855596	7.76459e-07
Gs13	23808271	24008271	7.20233e-11
Gs13	26226016	26434463	1.47575e-08
Gs13	44668745	44868745	1.86246e-07
Gs14	18929858	19130004	2.59966e-11
Gs14	20744597	20944597	1.16136e-07
Gs14	20974326	21174326	5.42277e-08
Gs14	28392059	28592059	3.54096e-10
Gs14	31736992	31937120	8.01767e-13
Gs14	32027765	32227765	2.15041e-09
Gs14	34726425	34926427	2.74915e-14
Gs14	35287417	35487417	1.10322e-07
Gs14	41209215	41409215	4.37946e-09
Gs15	4491475	4691475	5.20144e-07
Gs15	20338757	20538757	1.14628e-07
Gs15	24098777	24298777	8.76984e-09
Gs15	40184564	40384564	1.45619e-06
Gs15	47895373	48095373	1.47324e-06
Gs16	7981755	8181755	2.253e-07
Gs16	17862057	18062057	1.11263e-07
Gs16	32312566	32512566	2.01743e-08
Gs17	632092	832092	6.86063e-09
Gs18	6391862	6591883	4.512e-08
Gs18	11311746	11511768	9.75755e-08
Gs18	17352943	17553127	5.5547e-08
Gs18	22248895	22546181	1.70798e-07
Gs18	26996015	27196015	9.47131e-11
Gs18	37384403	37584403	1.73634e-07
Gs18	40702294	40902294	9.54012e-07
Gs18	46541846	46741846	1.51358e-06
Gs18	46765182	46965182	3.24228e-07
Gs18	50283734	50483734	3.98941e-07
Gs20	17299926	17499926	3.78768e-09
Gs20	19593302	19793349	9.84163e-08
Gs20	33587996	33787996	3.05077e-09

## Sheet: S2
Dataset S2. SALs for annual mean precipitation
Chromosome	Start	End	p-value (the most significant SNP)
Gs01	10533827	10733827	1.15198e-08
Gs01	30570470	30770470	1.59393e-08
Gs01	31920141	32120141	9.62507e-07
Gs01	47189360	47389360	7.51236e-07
Gs01	50334554	50534554	2.3919e-09
Gs01	57741822	57941822	6.51174e-08
Gs02	18414822	18614822	8.02883e-08
Gs02	28317763	28517763	6.96243e-07
Gs02	31983215	32183326	1.23753e-08
Gs02	43863171	44063273	8.52338e-12
Gs03	38330199	38530199	1.47808e-06
Gs04	731124	931175	1.1002e-07
Gs04	10445316	10778660	2.67694e-12
Gs04	15697839	15897839	3.28857e-07
Gs04	18373518	18573518	1.23869e-06
Gs04	18630349	18977478	3.05322e-09
Gs04	28480095	28680163	6.56831e-10
Gs04	33921130	34121292	5.32802e-14
Gs04	50874732	51074732	1.74098e-07
Gs05	8163117	8363117	5.58203e-09
Gs05	9626996	9827039	4.13163e-08
Gs06	35403065	35603065	6.10439e-13
Gs06	43459903	43659903	6.90437e-07
Gs06	46734531	46934531	1.50472e-06
Gs06	48271138	48471138	2.14478e-08
Gs06	49616469	49816469	1.15569e-06
Gs07	1008414	1208414	1.15611e-06
Gs08	14772957	14972957	2.5178e-07
Gs08	36732153	36976272	1.76473e-10
Gs08	45761044	45961044	2.34178e-09
Gs09	4799094	4999094	6.86113e-07
Gs09	5218837	5418837	1.12715e-09
Gs09	25118747	25318747	1.22964e-07
Gs09	28229006	28429006	1.58244e-07
Gs10	6787292	6987292	6.2017e-08
Gs10	11957144	12157144	1.18156e-06
Gs10	18152152	18352152	1.0326e-09
Gs10	19371915	19571915	2.47155e-07
Gs10	23000638	23200638	3.73425e-07
Gs10	25930696	26130696	5.12348e-07
Gs10	38312469	38512469	2.77796e-08
Gs10	40806659	41006682	1.92756e-07
Gs10	51529508	51729509	1.066e-06
Gs11	6645854	6845854	3.56398e-10
Gs11	7822461	8022461	2.61677e-09
Gs11	28057337	28257337	1.03849e-09
Gs11	37921799	38121799	1.35509e-07
Gs11	39075306	39275306	1.29415e-08
Gs12	19556653	19756653	1.02149e-07
Gs12	19796467	19996467	7.64886e-09
Gs12	20465192	20665252	2.24692e-11
Gs12	23470034	23670214	4.52964e-10
Gs12	27338314	27538314	5.38251e-07
Gs12	39214273	39414273	8.32034e-07
Gs13	1751581	1951613	4.08812e-13
Gs13	4421993	4621993	1.28313e-07
Gs13	7922165	8122165	1.54576e-08
Gs13	23808271	24008271	1.13424e-08
Gs13	31800339	32000339	1.89234e-11
Gs14	5006883	5206883	6.05723e-07
Gs14	6320904	6520904	1.85023e-07
Gs14	6873947	7077062	8.18803e-10
Gs14	12024152	12224242	1.63212e-08
Gs14	17017314	17217314	5.00755e-07
Gs14	20738397	20944597	8.1275e-09
Gs14	20974326	21174326	9.71664e-11
Gs14	31736997	31936997	6.12298e-07
Gs14	34726425	34926427	2.97012e-09
Gs14	41209215	41409215	1.14987e-06
Gs15	4491475	4691475	2.11088e-08
Gs15	20105360	20305360	8.31678e-07
Gs15	20338757	20538757	3.39227e-08
Gs15	24098777	24298777	5.75433e-14
Gs15	38112439	38312439	2.77204e-07
Gs15	38537179	38737361	3.95326e-15
Gs15	39926660	40152406	2.49548e-08
Gs16	7981755	8181755	1.22404e-06
Gs16	22491541	22691541	6.85626e-11
Gs16	23900879	24101031	1.28158e-08
Gs17	5652013	5852013	2.08317e-08
Gs17	24166667	24366667	6.92518e-08
Gs17	36858659	37058669	1.8284e-07
Gs18	9648897	9848897	5.45015e-07
Gs18	11205400	11405434	5.44755e-08
Gs18	11735883	11935929	1.16859e-08
Gs18	17352943	17553127	1.69445e-09
Gs18	22600588	22800588	1.47212e-10
Gs18	25300033	25500033	2.92783e-07
Gs18	27100764	27300764	6.01117e-08
Gs18	37384403	37584403	1.28476e-10
Gs18	39647042	39847042	1.36125e-06
Gs18	40803728	41003728	3.73828e-09
Gs18	46765182	46965182	5.28154e-09
Gs18	50283734	50483734	3.20907e-12
Gs19	21340571	21591455	2.91727e-08
Gs19	36449102	36649102	3.25022e-07
Gs19	46578523	46778523	1.53231e-08
Gs19	49432104	49632104	1.94754e-08
Gs20	2637924	2837924	7.22009e-08
Gs20	17299926	17499926	1.24041e-06
Gs20	19593302	19793349	2.63516e-12
Gs20	29474274	29674274	1.45258e-10
Gs20	33587996	33787996	4.31632e-07
Gs20	41464961	41664961	1.03239e-07

## Sheet: S3
Dataset S3. SALs for latitude.
Chromosome	Start	End	p-value (the most significant SNP)
Gs01	6691476	6891560	2.08976e-09
Gs01	7494900	7694900	1.15264e-06
Gs01	10533827	10733827	7.79377e-08
Gs01	13373865	13573865	5.62093e-07
Gs01	29984997	30184997	4.64182e-07
Gs01	52484741	52684741	4.79058e-08
Gs01	57741822	57941822	6.097e-07
Gs02	4972765	5172765	1.35519e-07
Gs02	13343453	13543476	3.93824e-07
Gs02	18414822	18614841	2.23121e-10
Gs02	19773492	20205277	3.37494e-07
Gs02	23066422	23266422	1.3988e-07
Gs02	26205913	26405913	4.53464e-07
Gs02	37869217	38069217	1.08382e-07
Gs02	43863273	44063273	6.78171e-07
Gs02	48110879	48310893	1.40269e-06
Gs04	731175	931175	1.46501e-06
Gs04	10445316	10778660	1.66946e-08
Gs04	18630349	18977385	1.09478e-06
Gs04	28480095	28680163	3.95118e-08
Gs04	32831968	33032086	1.11551e-08
Gs04	33921130	34121292	1.15012e-10
Gs04	47965508	48165508	3.75298e-07
Gs05	8163117	8363117	4.57999e-10
Gs05	30864869	31064869	1.45835e-07
Gs05	38923467	39123524	1.77535e-08
Gs06	8859388	9059388	4.03798e-07
Gs06	11298979	11498979	4.68579e-07
Gs06	34754296	34954296	1.16732e-06
Gs06	46734568	46934568	3.9832e-07
Gs08	14772957	14972957	8.06698e-07
Gs08	17994333	18194333	2.64755e-09
Gs08	36732153	36976272	1.87082e-08
Gs08	39122495	39322495	3.93605e-07
Gs08	45761044	45961044	1.82559e-08
Gs09	5218837	5418837	9.34794e-11
Gs09	17484048	17684048	6.52001e-09
Gs09	47056975	47256975	9.38889e-07
Gs10	6787292	6987292	1.82032e-08
Gs10	7082290	7282290	6.84167e-09
Gs10	8038833	8238833	8.98981e-08
Gs10	11957144	12157144	9.74409e-08
Gs10	18152152	18352152	4.60503e-08
Gs10	23000638	23200638	9.0236e-07
Gs10	38312469	38512469	2.46288e-08
Gs10	51529508	51729509	1.84268e-08
Gs11	6645854	6845854	6.78411e-08
Gs11	19610986	19810986	6.91392e-07
Gs11	28057337	28257337	3.94738e-08
Gs11	28829180	29029180	8.63937e-09
Gs11	37921799	38121799	1.23416e-07
Gs12	20465205	20665252	3.03583e-09
Gs12	23470101	23670173	1.25643e-08
Gs12	27338314	27538314	9.31985e-07
Gs12	39214273	39414273	2.46885e-07
Gs12	39784998	39985013	7.47658e-09
Gs13	1751581	1951613	4.04383e-11
Gs13	4421991	4622057	1.33249e-07
Gs13	7922165	8122165	1.27856e-06
Gs13	15709694	15909694	3.20434e-07
Gs13	21655596	21855596	1.18729e-07
Gs13	23808271	24008271	1.44283e-10
Gs13	26226016	26426016	3.1059e-07
Gs13	31800339	32000339	5.53839e-07
Gs13	44668745	44868745	1.21772e-08
Gs14	18929874	19129874	1.71347e-09
Gs14	20744597	20944597	2.20344e-08
Gs14	20974326	21174326	1.02346e-09
Gs14	28392059	28592059	6.52166e-09
Gs14	31736992	31937120	4.50761e-12
Gs14	32027765	32227765	8.39288e-09
Gs14	34726425	34926427	1.37116e-13
Gs14	35287417	35487417	5.14318e-08
Gs14	41209215	41409215	1.6479e-09
Gs15	4491475	4691475	6.31481e-08
Gs15	20338757	20538757	1.70941e-08
Gs15	24098777	24298777	6.72501e-11
Gs15	38537179	38737361	5.38106e-09
Gs15	47895350	48095488	2.55256e-07
Gs16	7981755	8181755	2.80951e-07
Gs16	17862057	18062057	1.36945e-07
Gs16	32312566	32512566	1.96481e-07
Gs17	632092	832092	2.21249e-08
Gs18	6391862	6591883	3.68037e-07
Gs18	9648897	9848897	2.09922e-07
Gs18	11311746	11511768	1.37393e-07
Gs18	11735883	11935929	4.93098e-08
Gs18	17352943	17553127	3.96836e-09
Gs18	22600588	22800588	3.10756e-07
Gs18	26996015	27196015	7.41088e-08
Gs18	37384403	37584403	8.95732e-10
Gs18	40702294	41003728	6.89367e-08
Gs18	46541846	46741846	6.82769e-07
Gs18	46765182	46965182	6.78308e-09
Gs18	50283734	50483734	1.57284e-09
Gs19	36449102	36649102	7.52626e-07
Gs19	46578523	46778523	1.40314e-06
Gs20	17299926	17499926	9.40415e-10
Gs20	19593302	19793349	8.56156e-11
Gs20	29474274	29674274	7.15418e-08
Gs20	33587996	33787996	6.33195e-09

## Sheet: S4
Dataset S4. The best blastp hits in Arabidopsis thaliana for genes in SALs for annual mean temperature.
gene	Chr	Start	End	p.value	arabidopsis_locus
GlysoPI483463.01G046900	Gs01	6691476	6891560	1.10156e-10	AT1G69440
GlysoPI483463.01G047000	Gs01	6691476	6891560	1.10156e-10	AT1G26660
GlysoPI483463.01G047100	Gs01	6691476	6891560	1.10156e-10	AT1G69420
GlysoPI483463.01G049600	Gs01	7494900	7695032	9.4777e-07	AT1G26610
GlysoPI483463.01G049700	Gs01	7494900	7695032	9.4777e-07	AT3G29360
GlysoPI483463.01G049800	Gs01	7494900	7695032	9.4777e-07	AT1G26560
GlysoPI483463.01G059300	Gs01	13373865	13573865	2.98902e-07	AT5G05400
GlysoPI483463.01G059400	Gs01	13373865	13573865	2.98902e-07	AT1G48490
GlysoPI483463.01G086900	Gs01	39102485	39302485	1.309e-06	AT2G45960
GlysoPI483463.01G087000	Gs01	39102485	39302485	1.309e-06	AT2G24670
GlysoPI483463.01G087100	Gs01	39102485	39302485	1.309e-06	AT2G24670
GlysoPI483463.01G141300	Gs01	52484741	52684741	9.98863e-10	AT4G36850
GlysoPI483463.01G141400	Gs01	52484741	52684741	9.98863e-10	AT5G09280
GlysoPI483463.01G141500	Gs01	52484741	52684741	9.98863e-10	AT2G23770
GlysoPI483463.01G141600	Gs01	52484741	52684741	9.98863e-10	AT2G33580
GlysoPI483463.01G141700	Gs01	52484741	52684741	9.98863e-10	AT5G66631
GlysoPI483463.01G141800	Gs01	52484741	52684741	9.98863e-10	AT3G11130
GlysoPI483463.01G141900	Gs01	52484741	52684741	9.98863e-10	AT3G26300
GlysoPI483463.01G142000	Gs01	52484741	52684741	9.98863e-10	AT3G26300
GlysoPI483463.01G142100	Gs01	52484741	52684741	9.98863e-10	AT3G26310
GlysoPI483463.01G142200	Gs01	52484741	52684741	9.98863e-10	AT3G26300
GlysoPI483463.01G142300	Gs01	52484741	52684741	9.98863e-10	AT4G36860
GlysoPI483463.01G142400	Gs01	52484741	52684741	9.98863e-10	AT4G36870
GlysoPI483463.01G142500	Gs01	52484741	52684741	9.98863e-10	AT3G50780
GlysoPI483463.01G142600	Gs01	52484741	52684741	9.98863e-10	AT2G23740
GlysoPI483463.01G142700	Gs01	52484741	52684741	9.98863e-10	AT5G66600
GlysoPI483463.01G142800	Gs01	52484741	52684741	9.98863e-10	AT2G28625
GlysoPI483463.01G142900	Gs01	52484741	52684741	9.98863e-10	AT5G66590
GlysoPI483463.01G143000	Gs01	52484741	52684741	9.98863e-10	AT3G50800
GlysoPI483463.02G049000	Gs02	4972765	5172765	2.81465e-07	AT4G36530
GlysoPI483463.02G049100	Gs02	4972765	5172765	2.81465e-07	AT2G18280
GlysoPI483463.02G049200	Gs02	4972765	5172765	2.81465e-07	AT2G18290
GlysoPI483463.02G049300	Gs02	4972765	5172765	2.81465e-07	AT4G36550
GlysoPI483463.02G049400	Gs02	4972765	5172765	2.81465e-07	AT1G75250
GlysoPI483463.02G049500	Gs02	4972765	5172765	2.81465e-07	AT1G75250
GlysoPI483463.02G049600	Gs02	4972765	5172765	2.81465e-07	AT2G18350
GlysoPI483463.02G049700	Gs02	4972765	5172765	2.81465e-07	AT1G75220
GlysoPI483463.02G049800	Gs02	4972765	5172765	2.81465e-07	AT1G75220
GlysoPI483463.02G049900	Gs02	4972765	5172765	2.81465e-07	AT2G18360
GlysoPI483463.02G050000	Gs02	4972765	5172765	2.81465e-07	AT3G50870
GlysoPI483463.02G050100	Gs02	4972765	5172765	2.81465e-07	AT5G66550
GlysoPI483463.02G050200	Gs02	4972765	5172765	2.81465e-07	AT5G49555
GlysoPI483463.02G050300	Gs02	4972765	5172765	2.81465e-07	AT3G50860
GlysoPI483463.02G050400	Gs02	4972765	5172765	2.81465e-07	AT5G49560
GlysoPI483463.02G050500	Gs02	4972765	5172765	2.81465e-07	AT1G55520
GlysoPI483463.02G050600	Gs02	4972765	5172765	2.81465e-07	AT4G36640
GlysoPI483463.02G050700	Gs02	4972765	5172765	2.81465e-07	AT3G48880
GlysoPI483463.02G050800	Gs02	4972765	5172765	2.81465e-07	AT5G66760
GlysoPI483463.02G050900	Gs02	4972765	5172765	2.81465e-07	AT3G50660
GlysoPI483463.02G051000	Gs02	4972765	5172765	2.81465e-07	AT3G50670
GlysoPI483463.02G051100	Gs02	4972765	5172765	2.81465e-07	AT2G18470
GlysoPI483463.02G112800	Gs02	13343453	13543476	3.00374e-07	AT1G40390
GlysoPI483463.02G112900	Gs02	13343453	13543476	3.00374e-07	AT5G13930
GlysoPI483463.02G113000	Gs02	13343453	13543476	3.00374e-07
GlysoPI483463.02G113100	Gs02	13343453	13543476	3.00374e-07	AT3G25620
GlysoPI483463.02G113200	Gs02	13343453	13543476	3.00374e-07	AT1G68750
GlysoPI483463.02G113300	Gs02	13343453	13543476	3.00374e-07	AT1G68750
GlysoPI483463.02G113400	Gs02	13343453	13543476	3.00374e-07	AT1G68760
GlysoPI483463.02G139600	Gs02	18414822	18614841	1.70035e-10	AT3G56640
GlysoPI483463.02G140200	Gs02	19773492	19973492	1.03936e-08	AT2G05642
GlysoPI483463.02G141500	Gs02	23066422	23266422	1.25119e-07	AT3G30730
GlysoPI483463.02G141600	Gs02	23066422	23266422	1.25119e-07	AT2G05642
GlysoPI483463.02G141700	Gs02	23066422	23266422	1.25119e-07	AT3G56960
GlysoPI483463.02G142700	Gs02	26205913	26405913	4.50006e-07	AT2G28600
GlysoPI483463.02G158400	Gs02	37869217	38069217	1.2318e-07	ATCG01130
GlysoPI483463.04G121700	Gs04	32831968	33032086	3.86495e-10	AT2G03500
GlysoPI483463.04G164400	Gs04	47965508	48165508	1.87848e-07	AT2G40980
GlysoPI483463.04G164500	Gs04	47965508	48165508	1.87848e-07	AT4G38620
GlysoPI483463.04G164600	Gs04	47965508	48165508	1.87848e-07	AT2G29880
GlysoPI483463.04G164700	Gs04	47965508	48165508	1.87848e-07	AT1G72160
GlysoPI483463.04G164800	Gs04	47965508	48165508	1.87848e-07	AT1G10940
GlysoPI483463.04G164900	Gs04	47965508	48165508	1.87848e-07	AT5G03795
GlysoPI483463.04G165000	Gs04	47965508	48165508	1.87848e-07	AT2G30390
GlysoPI483463.04G165100	Gs04	47965508	48165508	1.87848e-07
GlysoPI483463.04G165200	Gs04	47965508	48165508	1.87848e-07	AT5G09840
GlysoPI483463.04G165300	Gs04	47965508	48165508	1.87848e-07	AT5G63640
GlysoPI483463.04G165400	Gs04	47965508	48165508	1.87848e-07	AT4G08180
GlysoPI483463.04G165500	Gs04	47965508	48165508	1.87848e-07	AT1G21980
GlysoPI483463.04G165600	Gs04	47965508	48165508	1.87848e-07	AT5G08650
GlysoPI483463.04G165700	Gs04	47965508	48165508	1.87848e-07	AT1G34320
GlysoPI483463.04G165800	Gs04	47965508	48165508	1.87848e-07	AT4G38730
GlysoPI483463.04G165900	Gs04	47965508	48165508	1.87848e-07	AT1G77270
GlysoPI483463.04G166000	Gs04	47965508	48165508	1.87848e-07	AT5G13340
GlysoPI483463.04G166100	Gs04	47965508	48165508	1.87848e-07	AT2G03200
GlysoPI483463.05G064300	Gs05	8163117	8363117	1.79196e-09	AT1G13440
GlysoPI483463.05G064400	Gs05	8163117	8363117	1.79196e-09	AT3G27320
GlysoPI483463.05G064500	Gs05	8163117	8363117	1.79196e-09	AT4G15415
GlysoPI483463.05G064600	Gs05	8163117	8363117	1.79196e-09	AT5G40740
GlysoPI483463.05G064700	Gs05	8163117	8363117	1.79196e-09	AT3G26000
GlysoPI483463.05G096000	Gs05	30864869	31064869	9.70578e-08	AT1G22040
GlysoPI483463.05G096100	Gs05	30864869	31064869	9.70578e-08	AT4G33430
GlysoPI483463.05G096200	Gs05	30864869	31064869	9.70578e-08	AT4G34640
GlysoPI483463.05G096300	Gs05	30864869	31064869	9.70578e-08	AT4G33430
GlysoPI483463.05G096400	Gs05	30864869	31064869	9.70578e-08	AT3G53500
GlysoPI483463.05G096500	Gs05	30864869	31064869	9.70578e-08	AT5G64550
GlysoPI483463.05G096600	Gs05	30864869	31064869	9.70578e-08
GlysoPI483463.05G096700	Gs05	30864869	31064869	9.70578e-08	AT3G09580
GlysoPI483463.05G096800	Gs05	30864869	31064869	9.70578e-08	AT3G19720
GlysoPI483463.05G096900	Gs05	30864869	31064869	9.70578e-08	AT5G64530
GlysoPI483463.05G097000	Gs05	30864869	31064869	9.70578e-08	AT2G29880
GlysoPI483463.05G097100	Gs05	30864869	31064869	9.70578e-08	AT4G15010
GlysoPI483463.05G097200	Gs05	30864869	31064869	9.70578e-08	AT4G14320
GlysoPI483463.05G097300	Gs05	30864869	31064869	9.70578e-08	AT1G03050
GlysoPI483463.05G097400	Gs05	30864869	31064869	9.70578e-08
GlysoPI483463.05G097500	Gs05	30864869	31064869	9.70578e-08	AT3G26410
GlysoPI483463.05G097600	Gs05	30864869	31064869	9.70578e-08	AT3G26420
GlysoPI483463.05G097700	Gs05	30864869	31064869	9.70578e-08	AT3G43660
GlysoPI483463.05G097800	Gs05	30864869	31064869	9.70578e-08	AT3G43660
GlysoPI483463.05G178000	Gs05	38923467	39123524	1.99359e-09	AT5G41350
GlysoPI483463.05G178100	Gs05	38923467	39123524	1.99359e-09	AT5G41370
GlysoPI483463.05G178200	Gs05	38923467	39123524	1.99359e-09	AT5G41380
GlysoPI483463.05G178300	Gs05	38923467	39123524	1.99359e-09	AT4G23470
GlysoPI483463.05G178400	Gs05	38923467	39123524	1.99359e-09	AT3G61460
GlysoPI483463.05G178500	Gs05	38923467	39123524	1.99359e-09	AT1G63850
GlysoPI483463.05G178600	Gs05	38923467	39123524	1.99359e-09	AT5G41410
GlysoPI483463.05G178700	Gs05	38923467	39123524	1.99359e-09	AT4G23490
GlysoPI483463.05G178800	Gs05	38923467	39123524	1.99359e-09	AT1G01350
GlysoPI483463.05G178900	Gs05	38923467	39123524	1.99359e-09	AT1G69230
GlysoPI483463.05G179000	Gs05	38923467	39123524	1.99359e-09	AT4G23500
GlysoPI483463.05G179100	Gs05	38923467	39123524	1.99359e-09	AT4G01370
GlysoPI483463.05G179200	Gs05	38923467	39123524	1.99359e-09	AT4G25740
GlysoPI483463.05G179300	Gs05	38923467	39123524	1.99359e-09	AT1G63910
GlysoPI483463.05G179400	Gs05	38923467	39123524	1.99359e-09	AT1G63930
GlysoPI483463.05G179500	Gs05	38923467	39123524	1.99359e-09	AT1G63940
GlysoPI483463.05G179600	Gs05	38923467	39123524	1.99359e-09	AT1G63940
GlysoPI483463.05G179700	Gs05	38923467	39123524	1.99359e-09	AT1G01490
GlysoPI483463.05G179800	Gs05	38923467	39123524	1.99359e-09	AT3G61510
GlysoPI483463.05G179900	Gs05	38923467	39123524	1.99359e-09	AT1G63980
GlysoPI483463.05G180000	Gs05	38923467	39123524	1.99359e-09	AT4G23550
GlysoPI483463.05G180100	Gs05	38923467	39123524	1.99359e-09	AT4G11270
GlysoPI483463.06G098800	Gs06	8859388	9059388	8.78876e-07	AT1G36940
GlysoPI483463.06G098900	Gs06	8859388	9059388	8.78876e-07	AT1G77800
GlysoPI483463.06G099000	Gs06	8859388	9059388	8.78876e-07	AT1G36980
GlysoPI483463.06G099100	Gs06	8859388	9059388	8.78876e-07	AT1G77780
GlysoPI483463.06G099200	Gs06	8859388	9059388	8.78876e-07	AT1G36990
GlysoPI483463.06G099300	Gs06	8859388	9059388	8.78876e-07	AT4G08500
GlysoPI483463.06G099400	Gs06	8859388	9059388	8.78876e-07	AT4G08460
GlysoPI483463.06G099500	Gs06	8859388	9059388	8.78876e-07	AT1G77760
GlysoPI483463.06G099600	Gs06	8859388	9059388	8.78876e-07	AT1G77760
GlysoPI483463.06G099700	Gs06	8859388	9059388	8.78876e-07	AT5G14320
GlysoPI483463.06G099800	Gs06	8859388	9059388	8.78876e-07	AT1G21980
GlysoPI483463.06G099900	Gs06	8859388	9059388	8.78876e-07	AT4G08180
GlysoPI483463.06G100000	Gs06	8859388	9059388	8.78876e-07	AT2G17900
GlysoPI483463.06G100100	Gs06	8859388	9059388	8.78876e-07	AT1G77720
GlysoPI483463.06G100200	Gs06	8859388	9059388	8.78876e-07	AT1G75710
GlysoPI483463.06G100300	Gs06	8859388	9059388	8.78876e-07	AT4G08210
GlysoPI483463.06G100400	Gs06	8859388	9059388	8.78876e-07	AT1G77710
GlysoPI483463.06G122900	Gs06	11298979	11498979	7.00866e-09	AT5G53660
GlysoPI483463.06G123000	Gs06	11298979	11498979	7.00866e-09	AT3G47570
GlysoPI483463.06G123100	Gs06	11298979	11498979	7.00866e-09
GlysoPI483463.06G123200	Gs06	11298979	11498979	7.00866e-09	AT3G47580
GlysoPI483463.06G123300	Gs06	11298979	11498979	7.00866e-09	AT4G27670
GlysoPI483463.06G123400	Gs06	11298979	11498979	7.00866e-09	AT5G03890
GlysoPI483463.06G123500	Gs06	11298979	11498979	7.00866e-09	AT2G46780
GlysoPI483463.06G123600	Gs06	11298979	11498979	7.00866e-09	AT1G32790
GlysoPI483463.06G123700	Gs06	11298979	11498979	7.00866e-09	AT1G32790
GlysoPI483463.06G123800	Gs06	11298979	11498979	7.00866e-09	AT3G49430
GlysoPI483463.06G123900	Gs06	11298979	11498979	7.00866e-09	AT3G03810
GlysoPI483463.06G124000	Gs06	11298979	11498979	7.00866e-09	AT5G24510
GlysoPI483463.06G124100	Gs06	11298979	11498979	7.00866e-09	AT5G54165
GlysoPI483463.06G124200	Gs06	11298979	11498979	7.00866e-09	AT1G32920
GlysoPI483463.06G124300	Gs06	11298979	11498979	7.00866e-09
GlysoPI483463.06G124400	Gs06	11298979	11498979	7.00866e-09	AT1G64720
GlysoPI483463.06G124500	Gs06	11298979	11498979	7.00866e-09	AT5G24500
GlysoPI483463.06G124600	Gs06	11298979	11498979	7.00866e-09	AT5G24490
GlysoPI483463.06G124700	Gs06	11298979	11498979	7.00866e-09	AT5G24470
GlysoPI483463.06G124800	Gs06	11298979	11498979	7.00866e-09	AT5G53730
GlysoPI483463.06G124900	Gs06	11298979	11498979	7.00866e-09	AT5G24460
GlysoPI483463.06G125000	Gs06	11298979	11498979	7.00866e-09	AT5G24520
GlysoPI483463.06G125100	Gs06	11298979	11498979	7.00866e-09	AT5G24530
GlysoPI483463.06G125200	Gs06	11298979	11498979	7.00866e-09	AT5G54160
GlysoPI483463.06G125300	Gs06	11298979	11498979	7.00866e-09	AT5G54160
GlysoPI483463.06G125400	Gs06	11298979	11498979	7.00866e-09	AT5G54160
GlysoPI483463.06G125500	Gs06	11298979	11498979	7.00866e-09	AT4G27660
GlysoPI483463.06G125600	Gs06	11298979	11498979	7.00866e-09	AT3G49470
GlysoPI483463.08G199200	Gs08	17994333	18194356	1.0425e-10	AT1G80810
GlysoPI483463.08G199200	Gs08	17994333	18194356	1.0425e-10	AT4G31880
GlysoPI483463.08G199300	Gs08	17994333	18194356	1.0425e-10	AT1G15950
GlysoPI483463.08G199400	Gs08	17994333	18194356	1.0425e-10	AT1G15960
GlysoPI483463.08G199500	Gs08	17994333	18194356	1.0425e-10	AT5G10930
GlysoPI483463.08G199600	Gs08	17994333	18194356	1.0425e-10	AT3G58730
GlysoPI483463.08G199700	Gs08	17994333	18194356	1.0425e-10	AT1G80840
GlysoPI483463.08G199800	Gs08	17994333	18194356	1.0425e-10	AT5G57970
GlysoPI483463.08G199900	Gs08	17994333	18194356	1.0425e-10	AT1G15980
GlysoPI483463.08G200000	Gs08	17994333	18194356	1.0425e-10	AT1G80860
GlysoPI483463.08G200100	Gs08	17994333	18194356	1.0425e-10	AT4G37580
GlysoPI483463.08G200200	Gs08	17994333	18194356	1.0425e-10	AT1G16880
GlysoPI483463.08G200300	Gs08	17994333	18194356	1.0425e-10	AT1G73060
GlysoPI483463.08G200400	Gs08	17994333	18194356	1.0425e-10	AT1G19780
GlysoPI483463.08G200500	Gs08	17994333	18194356	1.0425e-10	AT2G03220
GlysoPI483463.08G200600	Gs08	17994333	18194356	1.0425e-10	AT2G03220
GlysoPI483463.08G200700	Gs08	17994333	18194356	1.0425e-10	AT2G35736
GlysoPI483463.08G200800	Gs08	17994333	18194356	1.0425e-10	AT2G35736
GlysoPI483463.08G200900	Gs08	17994333	18194356	1.0425e-10	AT1G16000
GlysoPI483463.08G201000	Gs08	17994333	18194356	1.0425e-10	AT1G80920
GlysoPI483463.08G201100	Gs08	17994333	18194356	1.0425e-10	AT4G31860
GlysoPI483463.08G239300	Gs08	34371073	34571073	4.73391e-07	AT5G44650
GlysoPI483463.08G248600	Gs08	39122495	39322495	1.30049e-07	AT1G24590
GlysoPI483463.08G248700	Gs08	39122495	39322495	1.30049e-07	AT3G26510
GlysoPI483463.08G248800	Gs08	39122495	39322495	1.30049e-07	AT3G26570
GlysoPI483463.08G248900	Gs08	39122495	39322495	1.30049e-07	AT1G70630
GlysoPI483463.08G249000	Gs08	39122495	39322495	1.30049e-07	AT2G34440
GlysoPI483463.08G249100	Gs08	39122495	39322495	1.30049e-07	AT3G26590
GlysoPI483463.08G249200	Gs08	39122495	39322495	1.30049e-07	AT2G42490
GlysoPI483463.08G296400	Gs08	45761044	45961044	5.70197e-08	AT1G55730
GlysoPI483463.08G296500	Gs08	45761044	45961044	5.70197e-08	AT3G13310
GlysoPI483463.08G296600	Gs08	45761044	45961044	5.70197e-08	AT3G13300
GlysoPI483463.08G296700	Gs08	45761044	45961044	5.70197e-08	AT3G13300
GlysoPI483463.08G296800	Gs08	45761044	45961044	5.70197e-08	AT3G13300
GlysoPI483463.08G296900	Gs08	45761044	45961044	5.70197e-08	AT3G13235
GlysoPI483463.08G297000	Gs08	45761044	45961044	5.70197e-08	AT5G43822
GlysoPI483463.08G297100	Gs08	45761044	45961044	5.70197e-08
GlysoPI483463.08G297200	Gs08	45761044	45961044	5.70197e-08	AT3G13230
GlysoPI483463.08G297300	Gs08	45761044	45961044	5.70197e-08	AT1G55760
GlysoPI483463.08G297400	Gs08	45761044	45961044	5.70197e-08	AT4G01070
GlysoPI483463.08G297500	Gs08	45761044	45961044	5.70197e-08	AT4G01070
GlysoPI483463.08G297600	Gs08	45761044	45961044	5.70197e-08	AT4G01070
GlysoPI483463.08G297700	Gs08	45761044	45961044	5.70197e-08
GlysoPI483463.08G297800	Gs08	45761044	45961044	5.70197e-08	AT4G01070
GlysoPI483463.08G297900	Gs08	45761044	45961044	5.70197e-08	AT4G01070
GlysoPI483463.08G298000	Gs08	45761044	45961044	5.70197e-08	AT4G01070
GlysoPI483463.08G298100	Gs08	45761044	45961044	5.70197e-08	AT4G01070
GlysoPI483463.08G298200	Gs08	45761044	45961044	5.70197e-08	AT3G60450
GlysoPI483463.08G298300	Gs08	45761044	45961044	5.70197e-08	AT3G18990
GlysoPI483463.08G298400	Gs08	45761044	45961044	5.70197e-08	AT3G18990
GlysoPI483463.08G298500	Gs08	45761044	45961044	5.70197e-08
GlysoPI483463.08G298600	Gs08	45761044	45961044	5.70197e-08
GlysoPI483463.08G298700	Gs08	45761044	45961044	5.70197e-08
GlysoPI483463.08G298800	Gs08	45761044	45961044	5.70197e-08	AT5G40240
GlysoPI483463.08G298800	Gs08	45761044	45961044	5.70197e-08	AT3G28100
GlysoPI483463.09G051300	Gs09	5218837	5418837	1.20152e-09	AT4G30180
GlysoPI483463.09G051400	Gs09	5218837	5418837	1.20152e-09	AT4G25910
GlysoPI483463.09G051500	Gs09	5218837	5418837	1.20152e-09	AT5G57340
GlysoPI483463.09G051600	Gs09	5218837	5418837	1.20152e-09	AT2G18980
GlysoPI483463.09G051700	Gs09	5218837	5418837	1.20152e-09	AT1G62520
GlysoPI483463.09G051800	Gs09	5218837	5418837	1.20152e-09	AT5G57330
GlysoPI483463.09G051900	Gs09	5218837	5418837	1.20152e-09	AT4G30160
GlysoPI483463.09G052000	Gs09	5218837	5418837	1.20152e-09	AT1G71840
GlysoPI483463.09G052100	Gs09	5218837	5418837	1.20152e-09	AT1G17690
GlysoPI483463.09G052200	Gs09	5218837	5418837	1.20152e-09	AT3G20250
GlysoPI483463.09G052300	Gs09	5218837	5418837	1.20152e-09	AT2G19080
GlysoPI483463.09G052400	Gs09	5218837	5418837	1.20152e-09	AT2G19090
GlysoPI483463.09G052500	Gs09	5218837	5418837	1.20152e-09	ATCG01230
GlysoPI483463.09G081700	Gs09	17484048	17684048	5.02184e-10	AT4G27290
GlysoPI483463.09G081800	Gs09	17484048	17684048	5.02184e-10	AT4G27290
GlysoPI483463.09G081900	Gs09	17484048	17684048	5.02184e-10
GlysoPI483463.09G082000	Gs09	17484048	17684048	5.02184e-10	AT1G53490
GlysoPI483463.09G222500	Gs09	46642743	46842743	2.24933e-07	AT2G34930
GlysoPI483463.09G222600	Gs09	46642743	46842743	2.24933e-07	AT5G37450
GlysoPI483463.09G222700	Gs09	46642743	46842743	2.24933e-07	AT2G34930
GlysoPI483463.09G222800	Gs09	46642743	46842743	2.24933e-07	AT5G01950
GlysoPI483463.09G222900	Gs09	46642743	46842743	2.24933e-07	AT1G32070
GlysoPI483463.09G223000	Gs09	46642743	46842743	2.24933e-07	AT3G08570
GlysoPI483463.09G223100	Gs09	46642743	46842743	2.24933e-07
GlysoPI483463.09G223200	Gs09	46642743	46842743	2.24933e-07	AT4G23660
GlysoPI483463.09G223300	Gs09	46642743	46842743	2.24933e-07	AT3G08670
GlysoPI483463.09G223400	Gs09	46642743	46842743	2.24933e-07	AT5G58300
GlysoPI483463.09G223500	Gs09	46642743	46842743	2.24933e-07	AT2G38580
GlysoPI483463.09G223600	Gs09	46642743	46842743	2.24933e-07	AT5G41700
GlysoPI483463.09G223700	Gs09	46642743	46842743	2.24933e-07	AT3G08710
GlysoPI483463.09G223800	Gs09	46642743	46842743	2.24933e-07	AT3G51550
GlysoPI483463.09G223900	Gs09	46642743	46842743	2.24933e-07	AT5G08380
GlysoPI483463.09G224000	Gs09	46642743	46842743	2.24933e-07	AT5G01930
GlysoPI483463.09G224100	Gs09	46642743	46842743	2.24933e-07	AT3G08720
GlysoPI483463.09G224200	Gs09	46642743	46842743	2.24933e-07	AT2G38570
GlysoPI483463.09G224300	Gs09	46642743	46842743	2.24933e-07	AT5G01910
GlysoPI483463.09G224400	Gs09	46642743	46842743	2.24933e-07	AT5G04930
GlysoPI483463.09G224500	Gs09	46642743	46842743	2.24933e-07	AT3G56400
GlysoPI483463.09G224600	Gs09	46642743	46842743	2.24933e-07
GlysoPI483463.09G224700	Gs09	46642743	46842743	2.24933e-07	AT5G43180
GlysoPI483463.09G224800	Gs09	46642743	46842743	2.24933e-07	AT3G52850
GlysoPI483463.09G224900	Gs09	46642743	46842743	2.24933e-07	AT4G21480
GlysoPI483463.09G225000	Gs09	46642743	46842743	2.24933e-07	AT2G38550
GlysoPI483463.09G225100	Gs09	46642743	46842743	2.24933e-07	AT5G01890
GlysoPI483463.09G227700	Gs09	47056975	47256975	6.26123e-07	AT1G62640
GlysoPI483463.09G227800	Gs09	47056975	47256975	6.26123e-07	AT4G25850
GlysoPI483463.09G227900	Gs09	47056975	47256975	6.26123e-07	AT3G51650
GlysoPI483463.09G228000	Gs09	47056975	47256975	6.26123e-07	AT3G51650
GlysoPI483463.09G228100	Gs09	47056975	47256975	6.26123e-07	AT5G05340
GlysoPI483463.09G228200	Gs09	47056975	47256975	6.26123e-07	AT5G05340
GlysoPI483463.09G228300	Gs09	47056975	47256975	6.26123e-07	AT2G38540
GlysoPI483463.09G228400	Gs09	47056975	47256975	6.26123e-07	AT2G40435
GlysoPI483463.09G228500	Gs09	47056975	47256975	6.26123e-07	AT3G51710
GlysoPI483463.09G228600	Gs09	47056975	47256975	6.26123e-07	AT4G14368
GlysoPI483463.09G228700	Gs09	47056975	47256975	6.26123e-07	AT3G08850
GlysoPI483463.09G228800	Gs09	47056975	47256975	6.26123e-07	AT5G01760
GlysoPI483463.09G228900	Gs09	47056975	47256975	6.26123e-07	AT3G08850
GlysoPI483463.09G229000	Gs09	47056975	47256975	6.26123e-07	AT5G01750
GlysoPI483463.09G229100	Gs09	47056975	47256975	6.26123e-07	AT4G35800
GlysoPI483463.09G229200	Gs09	47056975	47256975	6.26123e-07	AT5G01750
GlysoPI483463.09G229300	Gs09	47056975	47256975	6.26123e-07	AT4G13310
GlysoPI483463.09G229400	Gs09	47056975	47256975	6.26123e-07	AT2G38420
GlysoPI483463.10G063200	Gs10	7082290	7282290	5.25624e-11	AT5G45980
GlysoPI483463.10G063300	Gs10	7082290	7282290	5.25624e-11	AT3G11710
GlysoPI483463.10G063400	Gs10	7082290	7282290	5.25624e-11	AT2G18950
GlysoPI483463.10G063500	Gs10	7082290	7282290	5.25624e-11	AT2G18950
GlysoPI483463.10G063600	Gs10	7082290	7282290	5.25624e-11	AT2G18950
GlysoPI483463.10G068100	Gs10	8038833	8238833	2.09987e-08	AT2G36080
GlysoPI483463.10G068200	Gs10	8038833	8238833	2.09987e-08	AT5G04800
GlysoPI483463.10G068300	Gs10	8038833	8238833	2.09987e-08	AT5G45910
GlysoPI483463.10G068400	Gs10	8038833	8238833	2.09987e-08	AT5G45910
GlysoPI483463.10G068500	Gs10	8038833	8238833	2.09987e-08	AT3G11600
GlysoPI483463.10G068600	Gs10	8038833	8238833	2.09987e-08	AT2G37340
GlysoPI483463.10G078300	Gs10	11957144	12157144	5.09483e-07	AT3G60830
GlysoPI483463.10G078400	Gs10	11957144	12157144	5.09483e-07	AT1G51400
GlysoPI483463.10G078500	Gs10	11957144	12157144	5.09483e-07
GlysoPI483463.10G078600	Gs10	11957144	12157144	5.09483e-07	AT3G21055
GlysoPI483463.10G078700	Gs10	11957144	12157144	5.09483e-07	AT5G47970
GlysoPI483463.10G078800	Gs10	11957144	12157144	5.09483e-07	AT3G08010
GlysoPI483463.10G078900	Gs10	11957144	12157144	5.09483e-07	AT1G55530
GlysoPI483463.10G079000	Gs10	11957144	12157144	5.09483e-07	AT3G52080
GlysoPI483463.10G079100	Gs10	11957144	12157144	5.09483e-07	AT3G23890
GlysoPI483463.10G079200	Gs10	11957144	12157144	5.09483e-07	AT3G08030
GlysoPI483463.10G088800	Gs10	23583639	23783639	1.25182e-06	AT3G57190
GlysoPI483463.10G088900	Gs10	23583639	23783639	1.25182e-06	AT3G10160
GlysoPI483463.10G089000	Gs10	23583639	23783639	1.25182e-06	AT3G30730
GlysoPI483463.10G113100	Gs10	38312469	38512469	3.56539e-07	AT3G62010
GlysoPI483463.10G113200	Gs10	38312469	38512469	3.56539e-07	AT5G15610
GlysoPI483463.10G113300	Gs10	38312469	38512469	3.56539e-07	AT5G03560
GlysoPI483463.10G113400	Gs10	38312469	38512469	3.56539e-07	AT5G26742
GlysoPI483463.10G113500	Gs10	38312469	38512469	3.56539e-07	AT3G05940
GlysoPI483463.10G113600	Gs10	38312469	38512469	3.56539e-07	AT5G26731
GlysoPI483463.10G113700	Gs10	38312469	38512469	3.56539e-07
GlysoPI483463.10G113800	Gs10	38312469	38512469	3.56539e-07	AT1G09570
GlysoPI483463.10G113900	Gs10	38312469	38512469	3.56539e-07	AT5G26710
GlysoPI483463.10G114000	Gs10	38312469	38512469	3.56539e-07	AT3G62020
GlysoPI483463.10G114100	Gs10	38312469	38512469	3.56539e-07	AT5G26680
GlysoPI483463.10G114200	Gs10	38312469	38512469	3.56539e-07	AT1G59740
GlysoPI483463.10G114300	Gs10	38312469	38512469	3.56539e-07	AT3G05910
GlysoPI483463.10G242300	Gs10	51529508	51729509	4.02876e-09	AT3G19910
GlysoPI483463.10G242400	Gs10	51529508	51729509	4.02876e-09	AT1G50320
GlysoPI483463.10G242500	Gs10	51529508	51729509	4.02876e-09	AT3G19940
GlysoPI483463.10G242600	Gs10	51529508	51729509	4.02876e-09	AT3G59040
GlysoPI483463.10G242700	Gs10	51529508	51729509	4.02876e-09	AT3G19950
GlysoPI483463.10G242800	Gs10	51529508	51729509	4.02876e-09
GlysoPI483463.10G242900	Gs10	51529508	51729509	4.02876e-09
GlysoPI483463.10G243000	Gs10	51529508	51729509	4.02876e-09	AT5G08320
GlysoPI483463.10G243100	Gs10	51529508	51729509	4.02876e-09	AT5G23280
GlysoPI483463.10G243200	Gs10	51529508	51729509	4.02876e-09	AT5G23290
GlysoPI483463.10G243300	Gs10	51529508	51729509	4.02876e-09	AT2G29690
GlysoPI483463.10G243400	Gs10	51529508	51729509	4.02876e-09	AT5G23300
GlysoPI483463.10G243500	Gs10	51529508	51729509	4.02876e-09	AT3G19960
GlysoPI483463.10G243600	Gs10	51529508	51729509	4.02876e-09	AT5G08340
GlysoPI483463.10G243700	Gs10	51529508	51729509	4.02876e-09	AT3G19970
GlysoPI483463.10G243800	Gs10	51529508	51729509	4.02876e-09	AT5G23340
GlysoPI483463.10G243900	Gs10	51529508	51729509	4.02876e-09	AT5G23340
GlysoPI483463.10G244000	Gs10	51529508	51729509	4.02876e-09	AT5G64920
GlysoPI483463.10G244100	Gs10	51529508	51729509	4.02876e-09	AT5G08350
GlysoPI483463.10G244200	Gs10	51529508	51729509	4.02876e-09	AT5G08350
GlysoPI483463.10G244300	Gs10	51529508	51729509	4.02876e-09	AT5G08350
GlysoPI483463.10G244400	Gs10	51529508	51729509	4.02876e-09	AT5G08580
GlysoPI483463.10G244500	Gs10	51529508	51729509	4.02876e-09	AT5G46610
GlysoPI483463.10G244600	Gs10	51529508	51729509	4.02876e-09	AT4G17970
GlysoPI483463.10G244700	Gs10	51529508	51729509	4.02876e-09	AT5G46610
GlysoPI483463.10G244800	Gs10	51529508	51729509	4.02876e-09	AT2G27285
GlysoPI483463.10G244900	Gs10	51529508	51729509	4.02876e-09	AT3G20015
GlysoPI483463.10G245000	Gs10	51529508	51729509	4.02876e-09	AT1G50410
GlysoPI483463.11G191600	Gs11	33789546	33989546	1.00934e-06	AT1G70520
GlysoPI483463.11G191700	Gs11	33789546	33989546	1.00934e-06	AT1G70520
GlysoPI483463.11G191800	Gs11	33789546	33989546	1.00934e-06	AT2G32980
GlysoPI483463.11G191900	Gs11	33789546	33989546	1.00934e-06	AT1G70520
GlysoPI483463.11G192000	Gs11	33789546	33989546	1.00934e-06	AT1G70520
GlysoPI483463.11G192100	Gs11	33789546	33989546	1.00934e-06	AT1G56120
GlysoPI483463.12G121000	Gs12	20465215	20665252	9.47266e-07	AT1G49430
GlysoPI483463.12G121100	Gs12	20465215	20665252	9.47266e-07	AT3G20630
GlysoPI483463.12G125200	Gs12	23470155	23670155	8.94559e-07	AT2G24220
GlysoPI483463.12G125300	Gs12	23470155	23670155	8.94559e-07	AT4G30935
GlysoPI483463.12G185800	Gs12	39785004	39985004	6.35905e-08	AT1G61810
GlysoPI483463.12G185800	Gs12	39785004	39985004	6.35905e-08	AT1G61820
GlysoPI483463.12G185900	Gs12	39785004	39985004	6.35905e-08	AT1G61820
GlysoPI483463.12G186000	Gs12	39785004	39985004	6.35905e-08	AT1G52980
GlysoPI483463.12G186100	Gs12	39785004	39985004	6.35905e-08	AT5G53760
GlysoPI483463.12G186200	Gs12	39785004	39985004	6.35905e-08	AT3G15390
GlysoPI483463.12G186300	Gs12	39785004	39985004	6.35905e-08	AT3G15380
GlysoPI483463.12G186400	Gs12	39785004	39985004	6.35905e-08	AT5G53800
GlysoPI483463.12G186500	Gs12	39785004	39985004	6.35905e-08	AT3G15360
GlysoPI483463.12G186600	Gs12	39785004	39985004	6.35905e-08	AT1G23220
GlysoPI483463.12G186700	Gs12	39785004	39985004	6.35905e-08	AT1G53010
GlysoPI483463.12G186800	Gs12	39785004	39985004	6.35905e-08	AT1G53010
GlysoPI483463.12G186900	Gs12	39785004	39985004	6.35905e-08	AT4G21700
GlysoPI483463.12G187000	Gs12	39785004	39985004	6.35905e-08
GlysoPI483463.12G187100	Gs12	39785004	39985004	6.35905e-08	AT1G03080
GlysoPI483463.12G187200	Gs12	39785004	39985004	6.35905e-08	AT3G15355
GlysoPI483463.12G187300	Gs12	39785004	39985004	6.35905e-08	AT1G53035
GlysoPI483463.12G187400	Gs12	39785004	39985004	6.35905e-08	AT1G53040
GlysoPI483463.12G187500	Gs12	39785004	39985004	6.35905e-08	AT1G53050
GlysoPI483463.12G187600	Gs12	39785004	39985004	6.35905e-08	AT3G15354
GlysoPI483463.12G187700	Gs12	39785004	39985004	6.35905e-08	AT3G15350
GlysoPI483463.12G187800	Gs12	39785004	39985004	6.35905e-08	AT4G27500
GlysoPI483463.12G187900	Gs12	39785004	39985004	6.35905e-08	AT1G53120
GlysoPI483463.13G004600	Gs13	1751581	1951613	1.43001e-08	AT4G25330
GlysoPI483463.13G004700	Gs13	1751581	1951613	1.43001e-08	AT3G51690
GlysoPI483463.13G004800	Gs13	1751581	1951613	1.43001e-08	AT1G02960
GlysoPI483463.13G004900	Gs13	1751581	1951613	1.43001e-08	AT4G12680
GlysoPI483463.13G009000	Gs13	4421991	4621993	3.64851e-07	AT2G04570
GlysoPI483463.13G040400	Gs13	15709694	15909694	3.05368e-08	AT3G01220
GlysoPI483463.13G040400	Gs13	15709694	15909694	3.05368e-08	AT5G15150
GlysoPI483463.13G040500	Gs13	15709694	15909694	3.05368e-08	AT3G28760
GlysoPI483463.13G040600	Gs13	15709694	15909694	3.05368e-08	AT3G47800
GlysoPI483463.13G040700	Gs13	15709694	15909694	3.05368e-08	AT5G39890
GlysoPI483463.13G040800	Gs13	15709694	15909694	3.05368e-08	AT5G25150
GlysoPI483463.13G040900	Gs13	15709694	15909694	3.05368e-08	AT3G28720
GlysoPI483463.13G041000	Gs13	15709694	15909694	3.05368e-08	AT1G14420
GlysoPI483463.13G041100	Gs13	15709694	15909694	3.05368e-08	AT3G28730
GlysoPI483463.13G041200	Gs13	15709694	15909694	3.05368e-08	AT3G01280
GlysoPI483463.13G041300	Gs13	15709694	15909694	3.05368e-08	AT5G62740
GlysoPI483463.13G041400	Gs13	15709694	15909694	3.05368e-08
GlysoPI483463.13G041500	Gs13	15709694	15909694	3.05368e-08
GlysoPI483463.13G041600	Gs13	15709694	15909694	3.05368e-08	AT5G62670
GlysoPI483463.13G041700	Gs13	15709694	15909694	3.05368e-08	AT5G15070
GlysoPI483463.13G077700	Gs13	21655596	21855596	7.76459e-07	AT1G17455
GlysoPI483463.13G077800	Gs13	21655596	21855596	7.76459e-07
GlysoPI483463.13G077900	Gs13	21655596	21855596	7.76459e-07	AT2G31670
GlysoPI483463.13G078000	Gs13	21655596	21855596	7.76459e-07	AT2G47460
GlysoPI483463.13G078100	Gs13	21655596	21855596	7.76459e-07	AT5G09380
GlysoPI483463.13G078200	Gs13	21655596	21855596	7.76459e-07	AT2G28230
GlysoPI483463.13G078300	Gs13	21655596	21855596	7.76459e-07	AT3G13960
GlysoPI483463.13G078400	Gs13	21655596	21855596	7.76459e-07	AT5G35560
GlysoPI483463.13G078500	Gs13	21655596	21855596	7.76459e-07	AT2G06050
GlysoPI483463.13G078600	Gs13	21655596	21855596	7.76459e-07	AT2G06050
GlysoPI483463.13G078700	Gs13	21655596	21855596	7.76459e-07	AT5G35570
GlysoPI483463.13G078800	Gs13	21655596	21855596	7.76459e-07	AT2G06040
GlysoPI483463.13G078900	Gs13	21655596	21855596	7.76459e-07	AT2G06025
GlysoPI483463.13G079000	Gs13	21655596	21855596	7.76459e-07	AT3G42725
GlysoPI483463.13G079100	Gs13	21655596	21855596	7.76459e-07	AT2G06010
GlysoPI483463.13G079200	Gs13	21655596	21855596	7.76459e-07	AT1G49290
GlysoPI483463.13G079300	Gs13	21655596	21855596	7.76459e-07	AT5G21940
GlysoPI483463.13G079400	Gs13	21655596	21855596	7.76459e-07	AT3G45310
GlysoPI483463.13G079500	Gs13	21655596	21855596	7.76459e-07	AT2G05940
GlysoPI483463.13G079600	Gs13	21655596	21855596	7.76459e-07	AT2G05920
GlysoPI483463.13G079700	Gs13	21655596	21855596	7.76459e-07	AT5G20635
GlysoPI483463.13G079800	Gs13	21655596	21855596	7.76459e-07	AT2G05910
GlysoPI483463.13G098500	Gs13	23808271	24008271	7.20233e-11	AT2G37570
GlysoPI483463.13G098600	Gs13	23808271	24008271	7.20233e-11	AT2G37570
GlysoPI483463.13G098700	Gs13	23808271	24008271	7.20233e-11	AT5G02500
GlysoPI483463.13G098800	Gs13	23808271	24008271	7.20233e-11	AT5G02520
GlysoPI483463.13G098900	Gs13	23808271	24008271	7.20233e-11	AT3G53720
GlysoPI483463.13G099000	Gs13	23808271	24008271	7.20233e-11	AT2G37550
GlysoPI483463.13G099100	Gs13	23808271	24008271	7.20233e-11	AT5G02540
GlysoPI483463.13G099200	Gs13	23808271	24008271	7.20233e-11	AT2G37530
GlysoPI483463.13G099300	Gs13	23808271	24008271	7.20233e-11	AT3G53700
GlysoPI483463.13G099400	Gs13	23808271	24008271	7.20233e-11	AT5G59890
GlysoPI483463.13G099500	Gs13	23808271	24008271	7.20233e-11	AT2G37520
GlysoPI483463.13G099600	Gs13	23808271	24008271	7.20233e-11	AT2G37500
GlysoPI483463.13G099700	Gs13	23808271	24008271	7.20233e-11	AT3G53670
GlysoPI483463.13G099800	Gs13	23808271	24008271	7.20233e-11	AT2G37470
GlysoPI483463.13G099900	Gs13	23808271	24008271	7.20233e-11	AT3G62450
GlysoPI483463.13G100000	Gs13	23808271	24008271	7.20233e-11	AT3G53620
GlysoPI483463.13G100100	Gs13	23808271	24008271	7.20233e-11	AT2G37460
GlysoPI483463.13G100200	Gs13	23808271	24008271	7.20233e-11	AT5G59830
GlysoPI483463.13G100300	Gs13	23808271	24008271	7.20233e-11	AT2G37440
GlysoPI483463.13G100400	Gs13	23808271	24008271	7.20233e-11	AT2G37430
GlysoPI483463.13G100500	Gs13	23808271	24008271	7.20233e-11	AT2G37430
GlysoPI483463.13G100600	Gs13	23808271	24008271	7.20233e-11	AT3G53600
GlysoPI483463.13G100700	Gs13	23808271	24008271	7.20233e-11	AT2G37420
GlysoPI483463.13G118900	Gs13	26226016	26434463	1.47575e-08	AT3G52870
GlysoPI483463.13G119000	Gs13	26226016	26434463	1.47575e-08	AT2G27690
GlysoPI483463.13G119100	Gs13	26226016	26434463	1.47575e-08	AT1G28520
GlysoPI483463.13G119200	Gs13	26226016	26434463	1.47575e-08	AT5G46030
GlysoPI483463.13G119300	Gs13	26226016	26434463	1.47575e-08	AT1G28530
GlysoPI483463.13G119400	Gs13	26226016	26434463	1.47575e-08	AT5G55125
GlysoPI483463.13G119500	Gs13	26226016	26434463	1.47575e-08	AT5G46020
GlysoPI483463.13G119600	Gs13	26226016	26434463	1.47575e-08	AT3G20070
GlysoPI483463.13G119700	Gs13	26226016	26434463	1.47575e-08	AT5G49760
GlysoPI483463.13G119700	Gs13	26226016	26434463	1.47575e-08	AT1G79620
GlysoPI483463.13G119800	Gs13	26226016	26434463	1.47575e-08	AT1G28540
GlysoPI483463.13G119900	Gs13	26226016	26434463	1.47575e-08	AT5G60860
GlysoPI483463.13G120000	Gs13	26226016	26434463	1.47575e-08	AT5G45980
GlysoPI483463.13G120100	Gs13	26226016	26434463	1.47575e-08	AT3G11710
GlysoPI483463.13G120200	Gs13	26226016	26434463	1.47575e-08	AT5G09280
GlysoPI483463.13G120300	Gs13	26226016	26434463	1.47575e-08	AT2G18950
GlysoPI483463.13G120400	Gs13	26226016	26434463	1.47575e-08
GlysoPI483463.13G308700	Gs13	44668745	44868745	1.86246e-07	AT1G04250
GlysoPI483463.13G308800	Gs13	44668745	44868745	1.86246e-07	AT1G80380
GlysoPI483463.13G308900	Gs13	44668745	44868745	1.86246e-07	AT1G80360
GlysoPI483463.13G309000	Gs13	44668745	44868745	1.86246e-07	AT1G15550
GlysoPI483463.13G309100	Gs13	44668745	44868745	1.86246e-07	AT1G15520
GlysoPI483463.13G309200	Gs13	44668745	44868745	1.86246e-07	AT1G15520
GlysoPI483463.13G309300	Gs13	44668745	44868745	1.86246e-07	AT1G15520
GlysoPI483463.13G309400	Gs13	44668745	44868745	1.86246e-07	AT1G15520
GlysoPI483463.13G309500	Gs13	44668745	44868745	1.86246e-07	AT3G15550
GlysoPI483463.13G309600	Gs13	44668745	44868745	1.86246e-07	AT3G15570
GlysoPI483463.13G309700	Gs13	44668745	44868745	1.86246e-07	AT1G80300
GlysoPI483463.13G309800	Gs13	44668745	44868745	1.86246e-07	AT1G80280
GlysoPI483463.13G309800	Gs13	44668745	44868745	1.86246e-07	AT1G15490
GlysoPI483463.13G309900	Gs13	44668745	44868745	1.86246e-07
GlysoPI483463.13G310000	Gs13	44668745	44868745	1.86246e-07	AT5G11470
GlysoPI483463.13G310100	Gs13	44668745	44868745	1.86246e-07	AT1G10490
GlysoPI483463.13G310200	Gs13	44668745	44868745	1.86246e-07	AT5G11420
GlysoPI483463.13G310300	Gs13	44668745	44868745	1.86246e-07	AT1G80230
GlysoPI483463.13G310400	Gs13	44668745	44868745	1.86246e-07	AT1G52700
GlysoPI483463.13G310500	Gs13	44668745	44868745	1.86246e-07	AT3G15660
GlysoPI483463.13G310600	Gs13	44668745	44868745	1.86246e-07	AT1G15420
GlysoPI483463.13G310700	Gs13	44668745	44868745	1.86246e-07	AT1G52690
GlysoPI483463.13G310800	Gs13	44668745	44868745	1.86246e-07	AT1G80210
GlysoPI483463.14G106400	Gs14	18929858	19130004	2.59966e-11	AT4G32630
GlysoPI483463.14G106500	Gs14	18929858	19130004	2.59966e-11	AT2G25680
GlysoPI483463.14G106600	Gs14	18929858	19130004	2.59966e-11	AT3G13560
GlysoPI483463.14G106700	Gs14	18929858	19130004	2.59966e-11
GlysoPI483463.14G110500	Gs14	20744597	20944597	1.16136e-07	AT4G31570
GlysoPI483463.14G110700	Gs14	20974326	21174326	5.42277e-08	AT4G31580
GlysoPI483463.14G117700	Gs14	28392059	28592059	3.54096e-10	AT1G77590
GlysoPI483463.14G117800	Gs14	28392059	28592059	3.54096e-10	AT1G21830
GlysoPI483463.14G117900	Gs14	28392059	28592059	3.54096e-10	AT3G26430
GlysoPI483463.14G118000	Gs14	28392059	28592059	3.54096e-10	AT3G26430
GlysoPI483463.14G118100	Gs14	28392059	28592059	3.54096e-10	AT3G26430
GlysoPI483463.14G118100	Gs14	28392059	28592059	3.54096e-10	AT1G67830
GlysoPI483463.14G123700	Gs14	31736992	31937120	8.01767e-13	AT3G49260
GlysoPI483463.14G126200	Gs14	34726425	34926427	2.74915e-14	AT2G05642
GlysoPI483463.14G126300	Gs14	34726425	34926427	2.74915e-14	AT1G77120
GlysoPI483463.14G126400	Gs14	34726425	34926427	2.74915e-14	AT1G43800
GlysoPI483463.14G126500	Gs14	34726425	34926427	2.74915e-14	AT4G10180
GlysoPI483463.14G126600	Gs14	34726425	34926427	2.74915e-14	AT1G43790
GlysoPI483463.14G127100	Gs14	35287417	35487417	1.10322e-07	AT1G77220
GlysoPI483463.14G127200	Gs14	35287417	35487417	1.10322e-07	AT1G21370
GlysoPI483463.15G054100	Gs15	4491475	4691475	5.20144e-07	AT2G22540
GlysoPI483463.15G054200	Gs15	4491475	4691475	5.20144e-07	AT2G22540
GlysoPI483463.15G054300	Gs15	4491475	4691475	5.20144e-07	AT4G33620
GlysoPI483463.15G054400	Gs15	4491475	4691475	5.20144e-07	AT2G14110
GlysoPI483463.15G054500	Gs15	4491475	4691475	5.20144e-07	AT4G38070
GlysoPI483463.15G054600	Gs15	4491475	4691475	5.20144e-07	AT5G64390
GlysoPI483463.15G054700	Gs15	4491475	4691475	5.20144e-07	AT4G33650
GlysoPI483463.15G054800	Gs15	4491475	4691475	5.20144e-07	AT5G17050
GlysoPI483463.15G054900	Gs15	4491475	4691475	5.20144e-07	AT2G14170
GlysoPI483463.15G055000	Gs15	4491475	4691475	5.20144e-07	AT4G31070
GlysoPI483463.15G055100	Gs15	4491475	4691475	5.20144e-07	AT1G18265
GlysoPI483463.15G055200	Gs15	4491475	4691475	5.20144e-07	AT5G10530
GlysoPI483463.15G055300	Gs15	4491475	4691475	5.20144e-07	AT5G14050
GlysoPI483463.15G055400	Gs15	4491475	4691475	5.20144e-07	AT1G72680
GlysoPI483463.15G055500	Gs15	4491475	4691475	5.20144e-07	AT4G37940
GlysoPI483463.15G055600	Gs15	4491475	4691475	5.20144e-07	AT5G64410
GlysoPI483463.15G055700	Gs15	4491475	4691475	5.20144e-07	AT5G64410
GlysoPI483463.15G055800	Gs15	4491475	4691475	5.20144e-07	AT5G09590
GlysoPI483463.15G055900	Gs15	4491475	4691475	5.20144e-07	AT2G04305
GlysoPI483463.15G056000	Gs15	4491475	4691475	5.20144e-07	AT5G64420
GlysoPI483463.15G056100	Gs15	4491475	4691475	5.20144e-07	AT5G65630
GlysoPI483463.15G056200	Gs15	4491475	4691475	5.20144e-07	AT1G06230
GlysoPI483463.15G169000	Gs15	20338757	20538757	1.14628e-07	AT1G56720
GlysoPI483463.15G169100	Gs15	20338757	20538757	1.14628e-07	AT3G29638
GlysoPI483463.15G169200	Gs15	20338757	20538757	1.14628e-07	AT1G59960
GlysoPI483463.15G169300	Gs15	20338757	20538757	1.14628e-07	AT2G36060
GlysoPI483463.15G175500	Gs15	24098777	24298777	8.76984e-09	AT1G32050
GlysoPI483463.15G175600	Gs15	24098777	24298777	8.76984e-09	AT4G39630
GlysoPI483463.15G175700	Gs15	24098777	24298777	8.76984e-09	AT3G22142
GlysoPI483463.15G190500	Gs15	40184564	40384564	1.45619e-06	AT5G17770
GlysoPI483463.15G190600	Gs15	40184564	40384564	1.45619e-06	AT5G27600
GlysoPI483463.15G190700	Gs15	40184564	40384564	1.45619e-06	AT5G04920
GlysoPI483463.15G190800	Gs15	40184564	40384564	1.45619e-06	AT4G34131
GlysoPI483463.15G190900	Gs15	40184564	40384564	1.45619e-06	AT5G50350
GlysoPI483463.15G207100	Gs15	47895373	48095373	1.47324e-06	AT3G14590
GlysoPI483463.15G207100	Gs15	47895373	48095373	1.47324e-06	AT1G53590
GlysoPI483463.15G207200	Gs15	47895373	48095373	1.47324e-06	AT3G14580
GlysoPI483463.15G207300	Gs15	47895373	48095373	1.47324e-06	AT3G14570
GlysoPI483463.15G207400	Gs15	47895373	48095373	1.47324e-06	AT1G61190
GlysoPI483463.15G207500	Gs15	47895373	48095373	1.47324e-06	AT1G64110
GlysoPI483463.15G207600	Gs15	47895373	48095373	1.47324e-06	AT1G12280
GlysoPI483463.15G207700	Gs15	47895373	48095373	1.47324e-06	AT4G27220
GlysoPI483463.15G207800	Gs15	47895373	48095373	1.47324e-06
GlysoPI483463.16G068400	Gs16	7981755	8181755	2.253e-07	AT2G37410
GlysoPI483463.16G068500	Gs16	7981755	8181755	2.253e-07	AT5G25930
GlysoPI483463.16G068600	Gs16	7981755	8181755	2.253e-07	AT5G25930
GlysoPI483463.16G068700	Gs16	7981755	8181755	2.253e-07	AT5G48385
GlysoPI483463.16G068800	Gs16	7981755	8181755	2.253e-07	AT5G48380
GlysoPI483463.16G068900	Gs16	7981755	8181755	2.253e-07	AT3G14460
GlysoPI483463.16G069000	Gs16	7981755	8181755	2.253e-07	AT5G41761
GlysoPI483463.16G069100	Gs16	7981755	8181755	2.253e-07	AT4G27950
GlysoPI483463.16G081000	Gs16	17862057	18062057	1.11263e-07	AT4G20310
GlysoPI483463.16G125500	Gs16	32312566	32512566	2.01743e-08	AT1G71850
GlysoPI483463.16G125600	Gs16	32312566	32512566	2.01743e-08	AT1G71870
GlysoPI483463.16G125700	Gs16	32312566	32512566	2.01743e-08	AT1G34300
GlysoPI483463.16G125800	Gs16	32312566	32512566	2.01743e-08	AT1G34300
GlysoPI483463.16G125900	Gs16	32312566	32512566	2.01743e-08	AT1G71865
GlysoPI483463.16G126000	Gs16	32312566	32512566	2.01743e-08	AT5G46090
GlysoPI483463.16G126100	Gs16	32312566	32512566	2.01743e-08	AT1G34220
GlysoPI483463.16G126200	Gs16	32312566	32512566	2.01743e-08	AT5G60340
GlysoPI483463.16G126300	Gs16	32312566	32512566	2.01743e-08	AT1G05680
GlysoPI483463.16G126400	Gs16	32312566	32512566	2.01743e-08	AT2G39210
GlysoPI483463.16G126500	Gs16	32312566	32512566	2.01743e-08	AT5G43140
GlysoPI483463.16G126600	Gs16	32312566	32512566	2.01743e-08	AT5G48100
GlysoPI483463.16G126700	Gs16	32312566	32512566	2.01743e-08	AT1G71810
GlysoPI483463.16G126800	Gs16	32312566	32512566	2.01743e-08	AT5G36930
GlysoPI483463.16G126900	Gs16	32312566	32512566	2.01743e-08	AT5G36930
GlysoPI483463.16G127000	Gs16	32312566	32512566	2.01743e-08	AT5G36930
GlysoPI483463.16G127100	Gs16	32312566	32512566	2.01743e-08	AT5G36930
GlysoPI483463.16G127200	Gs16	32312566	32512566	2.01743e-08	AT5G36930
GlysoPI483463.16G127300	Gs16	32312566	32512566	2.01743e-08	AT5G17680
GlysoPI483463.16G127400	Gs16	32312566	32512566	2.01743e-08	AT4G02450
GlysoPI483463.16G127500	Gs16	32312566	32512566	2.01743e-08	AT1G22730
GlysoPI483463.16G127600	Gs16	32312566	32512566	2.01743e-08	AT1G71780
GlysoPI483463.16G127700	Gs16	32312566	32512566	2.01743e-08	AT1G62670
GlysoPI483463.17G006900	Gs17	632092	832092	6.86063e-09	AT4G17230
GlysoPI483463.17G007000	Gs17	632092	832092	6.86063e-09	AT4G16490
GlysoPI483463.17G007100	Gs17	632092	832092	6.86063e-09	AT5G47530
GlysoPI483463.17G007200	Gs17	632092	832092	6.86063e-09	AT5G47540
GlysoPI483463.17G007300	Gs17	632092	832092	6.86063e-09	AT4G12560
GlysoPI483463.17G007400	Gs17	632092	832092	6.86063e-09	AT4G12570
GlysoPI483463.17G007500	Gs17	632092	832092	6.86063e-09
GlysoPI483463.17G007600	Gs17	632092	832092	6.86063e-09	AT4G22360
GlysoPI483463.17G007700	Gs17	632092	832092	6.86063e-09	AT5G20130
GlysoPI483463.17G007800	Gs17	632092	832092	6.86063e-09	AT3G07880
GlysoPI483463.17G007900	Gs17	632092	832092	6.86063e-09
GlysoPI483463.17G008000	Gs17	632092	832092	6.86063e-09	AT4G22330
GlysoPI483463.17G008100	Gs17	632092	832092	6.86063e-09	AT4G22300
GlysoPI483463.17G008200	Gs17	632092	832092	6.86063e-09	AT1G12020
GlysoPI483463.17G008300	Gs17	632092	832092	6.86063e-09	AT1G62400
GlysoPI483463.17G008400	Gs17	632092	832092	6.86063e-09	AT4G05530
GlysoPI483463.17G008500	Gs17	632092	832092	6.86063e-09	AT4G05520
GlysoPI483463.17G008600	Gs17	632092	832092	6.86063e-09	AT3G25070
GlysoPI483463.17G008700	Gs17	632092	832092	6.86063e-09	AT1G62390
GlysoPI483463.17G008800	Gs17	632092	832092	6.86063e-09	AT1G05010
GlysoPI483463.17G008900	Gs17	632092	832092	6.86063e-09	AT4G03965
GlysoPI483463.17G009000	Gs17	632092	832092	6.86063e-09	AT2G30400
GlysoPI483463.17G009100	Gs17	632092	832092	6.86063e-09	AT1G12000
GlysoPI483463.17G009200	Gs17	632092	832092	6.86063e-09	AT1G62360
GlysoPI483463.18G061800	Gs18	6391862	6591883	4.512e-08
GlysoPI483463.18G061900	Gs18	6391862	6591883	4.512e-08	AT3G30842
GlysoPI483463.18G062000	Gs18	6391862	6591883	4.512e-08	AT3G07040
GlysoPI483463.18G062100	Gs18	6391862	6591883	4.512e-08	AT3G07040
GlysoPI483463.18G062200	Gs18	6391862	6591883	4.512e-08	AT3G04580
GlysoPI483463.18G062300	Gs18	6391862	6591883	4.512e-08
GlysoPI483463.18G062400	Gs18	6391862	6591883	4.512e-08
GlysoPI483463.18G062500	Gs18	6391862	6591883	4.512e-08
GlysoPI483463.18G062600	Gs18	6391862	6591883	4.512e-08
GlysoPI483463.18G062700	Gs18	6391862	6591883	4.512e-08	AT1G07380
GlysoPI483463.18G062800	Gs18	6391862	6591883	4.512e-08	AT3G04580
GlysoPI483463.18G062900	Gs18	6391862	6591883	4.512e-08
GlysoPI483463.18G063000	Gs18	6391862	6591883	4.512e-08
GlysoPI483463.18G088200	Gs18	11311746	11511768	9.75755e-08
GlysoPI483463.18G088300	Gs18	11311746	11511768	9.75755e-08	AT1G78570
GlysoPI483463.18G088400	Gs18	11311746	11511768	9.75755e-08	AT2G42840
GlysoPI483463.18G088500	Gs18	11311746	11511768	9.75755e-08	AT4G14130
GlysoPI483463.18G088600	Gs18	11311746	11511768	9.75755e-08	AT3G58840
GlysoPI483463.18G088700	Gs18	11311746	11511768	9.75755e-08	AT2G42880
GlysoPI483463.18G088800	Gs18	11311746	11511768	9.75755e-08	AT1G29400
GlysoPI483463.18G088900	Gs18	11311746	11511768	9.75755e-08	AT2G42910
GlysoPI483463.18G089000	Gs18	11311746	11511768	9.75755e-08	AT1G06520
GlysoPI483463.18G089100	Gs18	11311746	11511768	9.75755e-08	AT4G17310
GlysoPI483463.18G103100	Gs18	17352943	17553127	5.5547e-08	AT1G27200
GlysoPI483463.18G103200	Gs18	17352943	17553127	5.5547e-08	AT1G03750
GlysoPI483463.18G103300	Gs18	17352943	17553127	5.5547e-08	AT1G24190
GlysoPI483463.18G111300	Gs18	22248895	22546181	1.70798e-07	AT1G10710
GlysoPI483463.18G111400	Gs18	22248895	22546181	1.70798e-07	AT5G40460
GlysoPI483463.18G111500	Gs18	22248895	22546181	1.70798e-07	AT5G25150
GlysoPI483463.18G111600	Gs18	22248895	22546181	1.70798e-07	AT2G42490
GlysoPI483463.18G111700	Gs18	22248895	22546181	1.70798e-07	AT3G26590
GlysoPI483463.18G131500	Gs18	40702294	40902294	9.54012e-07	AT5G46550
GlysoPI483463.18G131600	Gs18	40702294	40902294	9.54012e-07	AT5G46550
GlysoPI483463.18G131700	Gs18	40702294	40902294	9.54012e-07	AT5G46550
GlysoPI483463.18G146900	Gs18	46541846	46741846	1.51358e-06
GlysoPI483463.18G147000	Gs18	46541846	46741846	1.51358e-06	AT3G09060
GlysoPI483463.18G147100	Gs18	46541846	46741846	1.51358e-06	AT3G09050
GlysoPI483463.18G147200	Gs18	46541846	46741846	1.51358e-06	AT2G38080
GlysoPI483463.18G147300	Gs18	46541846	46741846	1.51358e-06	AT2G38090
GlysoPI483463.18G147400	Gs18	46541846	46741846	1.51358e-06	AT5G01220
GlysoPI483463.18G147500	Gs18	46541846	46741846	1.51358e-06	AT3G09032
GlysoPI483463.18G147600	Gs18	46541846	46741846	1.51358e-06	AT2G38110
GlysoPI483463.18G147700	Gs18	46765182	46965182	3.24228e-07	AT4G08850
GlysoPI483463.18G147800	Gs18	46765182	46965182	3.24228e-07	AT4G00430
GlysoPI483463.18G147900	Gs18	46765182	46965182	3.24228e-07	AT2G38120
GlysoPI483463.18G148000	Gs18	46765182	46965182	3.24228e-07	AT4G28010
GlysoPI483463.18G148100	Gs18	46765182	46965182	3.24228e-07
GlysoPI483463.18G169700	Gs18	50283734	50483734	3.98941e-07	AT2G45550
GlysoPI483463.18G169800	Gs18	50283734	50483734	3.98941e-07	AT3G61040
GlysoPI483463.18G169900	Gs18	50283734	50483734	3.98941e-07	AT2G45550
GlysoPI483463.18G170000	Gs18	50283734	50483734	3.98941e-07	AT2G45540
GlysoPI483463.18G170100	Gs18	50283734	50483734	3.98941e-07	AT3G18030
GlysoPI483463.18G170200	Gs18	50283734	50483734	3.98941e-07	AT3G18030
GlysoPI483463.18G170300	Gs18	50283734	50483734	3.98941e-07	AT3G18030
GlysoPI483463.18G170400	Gs18	50283734	50483734	3.98941e-07	AT1G48605
GlysoPI483463.18G170500	Gs18	50283734	50483734	3.98941e-07	AT1G08500
GlysoPI483463.18G170600	Gs18	50283734	50483734	3.98941e-07	AT3G61050
GlysoPI483463.20G043100	Gs20	19593302	19793349	9.84163e-08	AT3G07740
GlysoPI483463.20G061300	Gs20	33587996	33787996	3.05077e-09	AT4G14410
GlysoPI483463.20G061400	Gs20	33587996	33787996	3.05077e-09	AT1G04360
GlysoPI483463.20G061500	Gs20	33587996	33787996	3.05077e-09	AT4G01630
GlysoPI483463.20G061600	Gs20	33587996	33787996	3.05077e-09	AT5G03050
GlysoPI483463.20G061700	Gs20	33587996	33787996	3.05077e-09	AT3G62010
GlysoPI483463.20G061800	Gs20	33587996	33787996	3.05077e-09	AT5G15610
GlysoPI483463.20G061900	Gs20	33587996	33787996	3.05077e-09	AT5G03560
GlysoPI483463.20G062000	Gs20	33587996	33787996	3.05077e-09	AT5G26742

## Sheet: S5
Dataset S5. The best blastp hits in Arabidopsis thaliana for genes in SALs for annual mean precipitation.
gene	Chr	Start	End	p.value	arabidopsis_locus
GlysoPI483463.01G056000	Gs01	10533827	10733827	1.15198e-08	AT1G69940
GlysoPI483463.01G056100	Gs01	10533827	10733827	1.15198e-08	AT5G15740
GlysoPI483463.01G056200	Gs01	10533827	10733827	1.15198e-08	AT1G69010
GlysoPI483463.01G075100	Gs01	30570470	30770470	1.59393e-08	AT1G72210
GlysoPI483463.01G075200	Gs01	30570470	30770470	1.59393e-08	AT4G17920
GlysoPI483463.01G075900	Gs01	31920141	32120141	9.62507e-07	AT5G46800
GlysoPI483463.01G104300	Gs01	47189360	47389360	7.51236e-07	AT2G45200
GlysoPI483463.01G104400	Gs01	47189360	47389360	7.51236e-07	AT2G45210
GlysoPI483463.01G104500	Gs01	47189360	47389360	7.51236e-07	AT3G60720
GlysoPI483463.01G104600	Gs01	47189360	47389360	7.51236e-07	AT2G45220
GlysoPI483463.01G104700	Gs01	47189360	47389360	7.51236e-07	AT3G22520
GlysoPI483463.01G120300	Gs01	50334554	50534554	2.3919e-09	AT4G36280
GlysoPI483463.01G120400	Gs01	50334554	50534554	2.3919e-09	AT4G35470
GlysoPI483463.01G120500	Gs01	50334554	50534554	2.3919e-09	AT2G17270
GlysoPI483463.01G120600	Gs01	50334554	50534554	2.3919e-09	AT5G67360
GlysoPI483463.01G120700	Gs01	50334554	50534554	2.3919e-09	AT3G51490
GlysoPI483463.01G120800	Gs01	50334554	50534554	2.3919e-09	AT1G76410
GlysoPI483463.01G120900	Gs01	50334554	50534554	2.3919e-09	AT2G17480
GlysoPI483463.01G121000	Gs01	50334554	50534554	2.3919e-09	AT1G42960
GlysoPI483463.01G121100	Gs01	50334554	50534554	2.3919e-09	AT5G65980
GlysoPI483463.01G121200	Gs01	50334554	50534554	2.3919e-09	AT2G17520
GlysoPI483463.01G121300	Gs01	50334554	50534554	2.3919e-09	AT3G51480
GlysoPI483463.01G121400	Gs01	50334554	50534554	2.3919e-09	AT3G51470
GlysoPI483463.01G121500	Gs01	50334554	50534554	2.3919e-09	AT2G17525
GlysoPI483463.01G202500	Gs01	57741822	57941822	6.51174e-08	AT4G34150
GlysoPI483463.01G202600	Gs01	57741822	57941822	6.51174e-08	AT3G19320
GlysoPI483463.01G202700	Gs01	57741822	57941822	6.51174e-08	AT3G19210
GlysoPI483463.01G202800	Gs01	57741822	57941822	6.51174e-08	AT3G19184
GlysoPI483463.01G202900	Gs01	57741822	57941822	6.51174e-08	AT1G49630
GlysoPI483463.01G203000	Gs01	57741822	57941822	6.51174e-08	AT4G38130
GlysoPI483463.01G203100	Gs01	57741822	57941822	6.51174e-08	AT1G76630
GlysoPI483463.01G203200	Gs01	57741822	57941822	6.51174e-08	AT2G27610
GlysoPI483463.01G203300	Gs01	57741822	57941822	6.51174e-08	AT5G25070
GlysoPI483463.01G203400	Gs01	57741822	57941822	6.51174e-08	AT1G21070
GlysoPI483463.01G203500	Gs01	57741822	57941822	6.51174e-08	AT1G21080
GlysoPI483463.01G203600	Gs01	57741822	57941822	6.51174e-08	AT1G76700
GlysoPI483463.02G139600	Gs02	18414822	18614822	8.02883e-08	AT3G56640
GlysoPI483463.02G145800	Gs02	28317763	28517763	6.96243e-07	AT5G49040
GlysoPI483463.02G145900	Gs02	28317763	28517763	6.96243e-07
GlysoPI483463.02G146000	Gs02	28317763	28517763	6.96243e-07	AT2G41945
GlysoPI483463.02G146100	Gs02	28317763	28517763	6.96243e-07	AT2G41940
GlysoPI483463.02G151000	Gs02	31983215	32183326	1.23753e-08	AT5G06800
GlysoPI483463.02G186200	Gs02	43863171	44063273	8.52338e-12	AT5G58900
GlysoPI483463.02G186300	Gs02	43863171	44063273	8.52338e-12	AT3G47000
GlysoPI483463.02G186400	Gs02	43863171	44063273	8.52338e-12	AT4G40080
GlysoPI483463.02G186500	Gs02	43863171	44063273	8.52338e-12	AT5G17910
GlysoPI483463.02G186600	Gs02	43863171	44063273	8.52338e-12	AT5G58870
GlysoPI483463.02G186700	Gs02	43863171	44063273	8.52338e-12	AT4G25440
GlysoPI483463.02G186800	Gs02	43863171	44063273	8.52338e-12	AT2G29640
GlysoPI483463.02G186900	Gs02	43863171	44063273	8.52338e-12	AT1G07300
GlysoPI483463.02G187000	Gs02	43863171	44063273	8.52338e-12	AT5G11050
GlysoPI483463.02G187100	Gs02	43863171	44063273	8.52338e-12	AT1G07260
GlysoPI483463.02G187200	Gs02	43863171	44063273	8.52338e-12	AT2G29730
GlysoPI483463.02G187300	Gs02	43863171	44063273	8.52338e-12	AT3G47120
GlysoPI483463.02G187400	Gs02	43863171	44063273	8.52338e-12	AT5G58770
GlysoPI483463.02G187500	Gs02	43863171	44063273	8.52338e-12	AT5G58760
GlysoPI483463.02G187600	Gs02	43863171	44063273	8.52338e-12	AT2G38170
GlysoPI483463.02G187700	Gs02	43863171	44063273	8.52338e-12	AT5G58730
GlysoPI483463.02G187800	Gs02	43863171	44063273	8.52338e-12	AT3G08510
GlysoPI483463.02G187900	Gs02	43863171	44063273	8.52338e-12	AT1G07200
GlysoPI483463.02G188000	Gs02	43863171	44063273	8.52338e-12	AT5G58620
GlysoPI483463.02G188100	Gs02	43863171	44063273	8.52338e-12	AT5G58630
GlysoPI483463.02G188200	Gs02	43863171	44063273	8.52338e-12	AT5G05580
GlysoPI483463.03G119200	Gs03	38330199	38530199	1.47808e-06
GlysoPI483463.03G119300	Gs03	38330199	38530199	1.47808e-06	AT4G02800
GlysoPI483463.03G119400	Gs03	38330199	38530199	1.47808e-06	AT1G09960
GlysoPI483463.03G119500	Gs03	38330199	38530199	1.47808e-06	AT3G63120
GlysoPI483463.03G119600	Gs03	38330199	38530199	1.47808e-06	AT4G02790
GlysoPI483463.03G119700	Gs03	38330199	38530199	1.47808e-06	AT5G19330
GlysoPI483463.03G119800	Gs03	38330199	38530199	1.47808e-06	AT3G63200
GlysoPI483463.03G119900	Gs03	38330199	38530199	1.47808e-06	AT4G02780
GlysoPI483463.03G120000	Gs03	38330199	38530199	1.47808e-06	AT3G63170
GlysoPI483463.03G120100	Gs03	38330199	38530199	1.47808e-06	AT4G02780
GlysoPI483463.03G120200	Gs03	38330199	38530199	1.47808e-06	AT1G03150
GlysoPI483463.03G120300	Gs03	38330199	38530199	1.47808e-06	AT1G03140
GlysoPI483463.03G120400	Gs03	38330199	38530199	1.47808e-06	ATCG00730
GlysoPI483463.03G120500	Gs03	38330199	38530199	1.47808e-06	AT4G02760
GlysoPI483463.03G120600	Gs03	38330199	38530199	1.47808e-06	AT4G02725
GlysoPI483463.03G120700	Gs03	38330199	38530199	1.47808e-06	AT5G28150
GlysoPI483463.03G120800	Gs03	38330199	38530199	1.47808e-06
GlysoPI483463.04G008600	Gs04	731124	931175	1.1002e-07	AT4G34660
GlysoPI483463.04G008700	Gs04	731124	931175	1.1002e-07	AT4G39050
GlysoPI483463.04G008800	Gs04	731124	931175	1.1002e-07	AT1G75540
GlysoPI483463.04G008900	Gs04	731124	931175	1.1002e-07	AT1G75520
GlysoPI483463.04G009000	Gs04	731124	931175	1.1002e-07	AT1G20440
GlysoPI483463.04G009100	Gs04	731124	931175	1.1002e-07	AT4G39100
GlysoPI483463.04G009200	Gs04	731124	931175	1.1002e-07	AT4G34610
GlysoPI483463.04G009300	Gs04	731124	931175	1.1002e-07	AT3G43850
GlysoPI483463.04G009400	Gs04	731124	931175	1.1002e-07	AT4G39120
GlysoPI483463.04G009500	Gs04	731124	931175	1.1002e-07	AT2G21490
GlysoPI483463.04G009600	Gs04	731124	931175	1.1002e-07	AT4G39140
GlysoPI483463.04G009700	Gs04	731124	931175	1.1002e-07
GlysoPI483463.04G009800	Gs04	731124	931175	1.1002e-07	AT4G21065
GlysoPI483463.04G009900	Gs04	731124	931175	1.1002e-07	AT4G34590
GlysoPI483463.04G010000	Gs04	731124	931175	1.1002e-07	AT4G34588
GlysoPI483463.04G010100	Gs04	731124	931175	1.1002e-07	AT2G21520
GlysoPI483463.04G010200	Gs04	731124	931175	1.1002e-07	AT2G21540
GlysoPI483463.04G010300	Gs04	731124	931175	1.1002e-07	AT2G16370
GlysoPI483463.04G010400	Gs04	731124	931175	1.1002e-07	AT5G38020
GlysoPI483463.04G010500	Gs04	731124	931175	1.1002e-07	AT4G34560
GlysoPI483463.04G010600	Gs04	731124	931175	1.1002e-07	AT2G21580
GlysoPI483463.04G010700	Gs04	731124	931175	1.1002e-07	AT2G17080
GlysoPI483463.04G010800	Gs04	731124	931175	1.1002e-07	AT2G17070
GlysoPI483463.04G010900	Gs04	731124	931175	1.1002e-07	AT2G17080
GlysoPI483463.04G011000	Gs04	731124	931175	1.1002e-07	AT2G17070
GlysoPI483463.04G011100	Gs04	731124	931175	1.1002e-07	AT2G17080
GlysoPI483463.04G104800	Gs04	15697839	15897839	3.28857e-07
GlysoPI483463.04G104900	Gs04	15697839	15897839	3.28857e-07	AT4G22900
GlysoPI483463.04G110400	Gs04	18373518	18573518	1.23869e-06	AT4G28230
GlysoPI483463.04G110500	Gs04	18373518	18573518	1.23869e-06	AT3G02080
GlysoPI483463.04G110600	Gs04	18373518	18573518	1.23869e-06	AT2G35040
GlysoPI483463.04G110700	Gs04	18373518	18573518	1.23869e-06	AT4G03170
GlysoPI483463.04G110800	Gs04	18373518	18573518	1.23869e-06	AT3G25400
GlysoPI483463.04G110900	Gs04	18373518	18573518	1.23869e-06	AT5G06980
GlysoPI483463.04G110900	Gs04	18373518	18573518	1.23869e-06	AT3G12320
GlysoPI483463.04G111000	Gs04	18373518	18573518	1.23869e-06	AT1G80190
GlysoPI483463.04G111100	Gs04	18630349	18977478	3.05322e-09	AT5G09860
GlysoPI483463.04G111200	Gs04	18630349	18977478	3.05322e-09	AT3G12270
GlysoPI483463.04G111300	Gs04	18630349	18977478	3.05322e-09
GlysoPI483463.04G111400	Gs04	18630349	18977478	3.05322e-09	AT3G56710
GlysoPI483463.04G111500	Gs04	18630349	18977478	3.05322e-09	AT5G15220
GlysoPI483463.04G111600	Gs04	18630349	18977478	3.05322e-09	AT5G13530
GlysoPI483463.04G194500	Gs04	50874732	51074732	1.74098e-07	AT5G53150
GlysoPI483463.04G194600	Gs04	50874732	51074732	1.74098e-07	AT1G78090
GlysoPI483463.04G194700	Gs04	50874732	51074732	1.74098e-07	AT5G53180
GlysoPI483463.04G194800	Gs04	50874732	51074732	1.74098e-07	AT5G24130
GlysoPI483463.04G194900	Gs04	50874732	51074732	1.74098e-07	AT5G53190
GlysoPI483463.04G195000	Gs04	50874732	51074732	1.74098e-07	AT5G24120
GlysoPI483463.04G195100	Gs04	50874732	51074732	1.74098e-07	AT5G24110
GlysoPI483463.04G195200	Gs04	50874732	51074732	1.74098e-07	AT5G53210
GlysoPI483463.04G195300	Gs04	50874732	51074732	1.74098e-07	AT2G46330
GlysoPI483463.04G195400	Gs04	50874732	51074732	1.74098e-07	AT4G27940
GlysoPI483463.04G195500	Gs04	50874732	51074732	1.74098e-07	AT4G27950
GlysoPI483463.04G195600	Gs04	50874732	51074732	1.74098e-07	AT4G27960
GlysoPI483463.04G195600	Gs04	50874732	51074732	1.74098e-07	AT1G64230
GlysoPI483463.04G195700	Gs04	50874732	51074732	1.74098e-07	AT5G53310
GlysoPI483463.04G195800	Gs04	50874732	51074732	1.74098e-07	AT4G23740
GlysoPI483463.04G195900	Gs04	50874732	51074732	1.74098e-07	AT5G53330
GlysoPI483463.04G196000	Gs04	50874732	51074732	1.74098e-07	AT5G53340
GlysoPI483463.04G196100	Gs04	50874732	51074732	1.74098e-07	AT3G18690
GlysoPI483463.04G196200	Gs04	50874732	51074732	1.74098e-07	AT3G52440
GlysoPI483463.04G196300	Gs04	50874732	51074732	1.74098e-07	AT5G41470
GlysoPI483463.04G196300	Gs04	50874732	51074732	1.74098e-07	AT1G71480
GlysoPI483463.05G064300	Gs05	8163117	8363117	5.58203e-09	AT1G13440
GlysoPI483463.05G064400	Gs05	8163117	8363117	5.58203e-09	AT3G27320
GlysoPI483463.05G064500	Gs05	8163117	8363117	5.58203e-09	AT4G15415
GlysoPI483463.05G064600	Gs05	8163117	8363117	5.58203e-09	AT5G40740
GlysoPI483463.05G064700	Gs05	8163117	8363117	5.58203e-09	AT3G26000
GlysoPI483463.05G066400	Gs05	9626996	9827039	4.13163e-08	AT5G05210
GlysoPI483463.05G066500	Gs05	9626996	9827039	4.13163e-08	AT3G01860
GlysoPI483463.05G066600	Gs05	9626996	9827039	4.13163e-08	AT3G50180
GlysoPI483463.05G066700	Gs05	9626996	9827039	4.13163e-08	AT1G53540
GlysoPI483463.06G203800	Gs06	35403065	35603065	6.10439e-13
GlysoPI483463.06G203900	Gs06	35403065	35603065	6.10439e-13	AT2G31085
GlysoPI483463.06G204000	Gs06	35403065	35603065	6.10439e-13
GlysoPI483463.06G204100	Gs06	35403065	35603065	6.10439e-13	AT1G73170
GlysoPI483463.06G221400	Gs06	43459903	43659903	6.90437e-07	AT2G41905
GlysoPI483463.06G221500	Gs06	43459903	43659903	6.90437e-07	AT4G27280
GlysoPI483463.06G221600	Gs06	43459903	43659903	6.90437e-07	AT4G27300
GlysoPI483463.06G221700	Gs06	43459903	43659903	6.90437e-07	AT4G27300
GlysoPI483463.06G221800	Gs06	43459903	43659903	6.90437e-07	AT4G27290
GlysoPI483463.06G221900	Gs06	43459903	43659903	6.90437e-07	AT1G73880
GlysoPI483463.06G222000	Gs06	43459903	43659903	6.90437e-07	AT4G21380
GlysoPI483463.06G222000	Gs06	43459903	43659903	6.90437e-07	AT4G27290
GlysoPI483463.06G222100	Gs06	43459903	43659903	6.90437e-07	AT4G27290
GlysoPI483463.06G222100	Gs06	43459903	43659903	6.90437e-07	AT4G21380
GlysoPI483463.06G222200	Gs06	43459903	43659903	6.90437e-07	AT4G21380
GlysoPI483463.06G240400	Gs06	46734531	46934531	1.50472e-06	AT4G38840
GlysoPI483463.06G240500	Gs06	46734531	46934531	1.50472e-06	AT4G38840
GlysoPI483463.06G240600	Gs06	46734531	46934531	1.50472e-06	AT4G38840
GlysoPI483463.06G240700	Gs06	46734531	46934531	1.50472e-06	AT4G38840
GlysoPI483463.06G240800	Gs06	46734531	46934531	1.50472e-06	AT4G38840
GlysoPI483463.06G240900	Gs06	46734531	46934531	1.50472e-06	AT4G38840
GlysoPI483463.06G241000	Gs06	46734531	46934531	1.50472e-06	AT4G38840
GlysoPI483463.06G241100	Gs06	46734531	46934531	1.50472e-06	AT5G45890
GlysoPI483463.06G241200	Gs06	46734531	46934531	1.50472e-06	AT5G45890
GlysoPI483463.06G241300	Gs06	46734531	46934531	1.50472e-06	AT3G58610
GlysoPI483463.06G241400	Gs06	46734531	46934531	1.50472e-06	AT1G68810
GlysoPI483463.06G241500	Gs06	46734531	46934531	1.50472e-06	AT1G69523
GlysoPI483463.06G241600	Gs06	46734531	46934531	1.50472e-06	AT1G69523
GlysoPI483463.06G241700	Gs06	46734531	46934531	1.50472e-06	AT2G31130
GlysoPI483463.06G241800	Gs06	46734531	46934531	1.50472e-06	AT2G42570
GlysoPI483463.06G241900	Gs06	46734531	46934531	1.50472e-06	AT2G42560
GlysoPI483463.06G242000	Gs06	46734531	46934531	1.50472e-06	AT1G06230
GlysoPI483463.06G242100	Gs06	46734531	46934531	1.50472e-06	AT2G31085
GlysoPI483463.06G242200	Gs06	46734531	46934531	1.50472e-06	AT3G58590
GlysoPI483463.06G242300	Gs06	46734531	46934531	1.50472e-06	AT2G38080
GlysoPI483463.06G242400	Gs06	46734531	46934531	1.50472e-06
GlysoPI483463.06G253000	Gs06	48271138	48471138	2.14478e-08	AT4G10265
GlysoPI483463.06G253100	Gs06	48271138	48471138	2.14478e-08	AT4G10265
GlysoPI483463.06G253200	Gs06	48271138	48471138	2.14478e-08	AT4G10265
GlysoPI483463.06G253300	Gs06	48271138	48471138	2.14478e-08	AT4G10265
GlysoPI483463.06G253400	Gs06	48271138	48471138	2.14478e-08	AT4G28210
GlysoPI483463.06G253500	Gs06	48271138	48471138	2.14478e-08	AT4G21490
GlysoPI483463.06G253600	Gs06	48271138	48471138	2.14478e-08	AT4G28240
GlysoPI483463.06G253700	Gs06	48271138	48471138	2.14478e-08	AT4G21450
GlysoPI483463.06G253800	Gs06	48271138	48471138	2.14478e-08	AT4G10265
GlysoPI483463.06G253900	Gs06	48271138	48471138	2.14478e-08	AT4G10265
GlysoPI483463.06G254000	Gs06	48271138	48471138	2.14478e-08	AT4G10265
GlysoPI483463.06G254100	Gs06	48271138	48471138	2.14478e-08	AT4G10265
GlysoPI483463.06G254200	Gs06	48271138	48471138	2.14478e-08	AT4G10265
GlysoPI483463.06G254300	Gs06	48271138	48471138	2.14478e-08	AT4G10265
GlysoPI483463.06G254400	Gs06	48271138	48471138	2.14478e-08	AT2G20890
GlysoPI483463.06G254500	Gs06	48271138	48471138	2.14478e-08	AT2G20900
GlysoPI483463.06G254600	Gs06	48271138	48471138	2.14478e-08	AT4G21440
GlysoPI483463.06G254700	Gs06	48271138	48471138	2.14478e-08	AT4G28100
GlysoPI483463.06G254800	Gs06	48271138	48471138	2.14478e-08	AT4G05120
GlysoPI483463.06G254900	Gs06	48271138	48471138	2.14478e-08	AT4G03270
GlysoPI483463.06G255000	Gs06	48271138	48471138	2.14478e-08	AT2G31180
GlysoPI483463.06G265700	Gs06	49616469	49816469	1.15569e-06	AT1G65440
GlysoPI483463.06G265800	Gs06	49616469	49816469	1.15569e-06	AT1G30400
GlysoPI483463.06G265900	Gs06	49616469	49816469	1.15569e-06	AT4G10800
GlysoPI483463.06G266000	Gs06	49616469	49816469	1.15569e-06	AT2G38695
GlysoPI483463.06G266100	Gs06	49616469	49816469	1.15569e-06	AT5G56790
GlysoPI483463.06G266200	Gs06	49616469	49816469	1.15569e-06	AT5G56790
GlysoPI483463.06G266300	Gs06	49616469	49816469	1.15569e-06	AT5G53530
GlysoPI483463.06G266400	Gs06	49616469	49816469	1.15569e-06	AT3G11440
GlysoPI483463.06G266400	Gs06	49616469	49816469	1.15569e-06	AT5G06100
GlysoPI483463.06G266500	Gs06	49616469	49816469	1.15569e-06	AT3G54360
GlysoPI483463.06G266600	Gs06	49616469	49816469	1.15569e-06	AT3G10400
GlysoPI483463.06G266700	Gs06	49616469	49816469	1.15569e-06	AT1G48560
GlysoPI483463.06G266800	Gs06	49616469	49816469	1.15569e-06	AT5G13750
GlysoPI483463.06G266900	Gs06	49616469	49816469	1.15569e-06	AT5G13750
GlysoPI483463.06G267000	Gs06	49616469	49816469	1.15569e-06	AT5G13740
GlysoPI483463.06G267000	Gs06	49616469	49816469	1.15569e-06	AT5G13750
GlysoPI483463.06G267100	Gs06	49616469	49816469	1.15569e-06	AT4G22900
GlysoPI483463.07G011300	Gs07	1008414	1208414	1.15611e-06	AT1G51745
GlysoPI483463.07G011400	Gs07	1008414	1208414	1.15611e-06	AT4G29410
GlysoPI483463.07G011500	Gs07	1008414	1208414	1.15611e-06
GlysoPI483463.07G011600	Gs07	1008414	1208414	1.15611e-06	AT1G73020
GlysoPI483463.07G011700	Gs07	1008414	1208414	1.15611e-06	AT1G51760
GlysoPI483463.07G011800	Gs07	1008414	1208414	1.15611e-06	AT1G51760
GlysoPI483463.07G011900	Gs07	1008414	1208414	1.15611e-06	AT5G11730
GlysoPI483463.07G012000	Gs07	1008414	1208414	1.15611e-06	AT3G21320
GlysoPI483463.07G012100	Gs07	1008414	1208414	1.15611e-06	AT3G21330
GlysoPI483463.07G012200	Gs07	1008414	1208414	1.15611e-06	AT1G51800
GlysoPI483463.07G012300	Gs07	1008414	1208414	1.15611e-06	AT5G35790
GlysoPI483463.07G012400	Gs07	1008414	1208414	1.15611e-06	AT1G14520
GlysoPI483463.07G012500	Gs07	1008414	1208414	1.15611e-06	AT3G16370
GlysoPI483463.07G012600	Gs07	1008414	1208414	1.15611e-06	AT4G26270
GlysoPI483463.07G012700	Gs07	1008414	1208414	1.15611e-06	AT1G51980
GlysoPI483463.07G012800	Gs07	1008414	1208414	1.15611e-06	AT4G25150
GlysoPI483463.07G012900	Gs07	1008414	1208414	1.15611e-06	AT4G25150
GlysoPI483463.07G013000	Gs07	1008414	1208414	1.15611e-06
GlysoPI483463.07G013100	Gs07	1008414	1208414	1.15611e-06	AT3G16490
GlysoPI483463.07G013200	Gs07	1008414	1208414	1.15611e-06	AT4G32850
GlysoPI483463.08G166100	Gs08	14772957	14972957	2.5178e-07	AT2G13810
GlysoPI483463.08G166200	Gs08	14772957	14972957	2.5178e-07	AT1G80670
GlysoPI483463.08G166300	Gs08	14772957	14972957	2.5178e-07	AT4G33430
GlysoPI483463.08G166400	Gs08	14772957	14972957	2.5178e-07	AT5G64570
GlysoPI483463.08G166500	Gs08	14772957	14972957	2.5178e-07	AT2G22590
GlysoPI483463.08G166600	Gs08	14772957	14972957	2.5178e-07	AT5G64530
GlysoPI483463.08G166700	Gs08	14772957	14972957	2.5178e-07	AT5G57190
GlysoPI483463.08G166800	Gs08	14772957	14972957	2.5178e-07	AT4G14320
GlysoPI483463.08G166900	Gs08	14772957	14972957	2.5178e-07	AT1G03050
GlysoPI483463.08G167000	Gs08	14772957	14972957	2.5178e-07	AT4G25980
GlysoPI483463.08G167100	Gs08	14772957	14972957	2.5178e-07
GlysoPI483463.08G167200	Gs08	14772957	14972957	2.5178e-07	AT1G43710
GlysoPI483463.08G167300	Gs08	14772957	14972957	2.5178e-07
GlysoPI483463.08G167400	Gs08	14772957	14972957	2.5178e-07	AT1G15120
GlysoPI483463.08G167500	Gs08	14772957	14972957	2.5178e-07	AT3G43660
GlysoPI483463.08G167600	Gs08	14772957	14972957	2.5178e-07	AT5G09900
GlysoPI483463.08G167700	Gs08	14772957	14972957	2.5178e-07	AT3G26330
GlysoPI483463.08G167800	Gs08	14772957	14972957	2.5178e-07	AT3G12110
GlysoPI483463.08G167900	Gs08	14772957	14972957	2.5178e-07	AT1G43670
GlysoPI483463.08G168000	Gs08	14772957	14972957	2.5178e-07
GlysoPI483463.08G168100	Gs08	14772957	14972957	2.5178e-07	AT1G25270
GlysoPI483463.08G168200	Gs08	14772957	14972957	2.5178e-07	AT1G68170
GlysoPI483463.08G244000	Gs08	36732153	36976272	1.76473e-10	AT5G10530
GlysoPI483463.08G244100	Gs08	36732153	36976272	1.76473e-10	AT5G65600
GlysoPI483463.08G244200	Gs08	36732153	36976272	1.76473e-10	AT2G18950
GlysoPI483463.08G244300	Gs08	36732153	36976272	1.76473e-10	AT5G65600
GlysoPI483463.08G244400	Gs08	36732153	36976272	1.76473e-10	AT5G10530
GlysoPI483463.08G244500	Gs08	36732153	36976272	1.76473e-10
GlysoPI483463.08G244600	Gs08	36732153	36976272	1.76473e-10	AT5G10530
GlysoPI483463.08G296400	Gs08	45761044	45961044	2.34178e-09	AT1G55730
GlysoPI483463.08G296500	Gs08	45761044	45961044	2.34178e-09	AT3G13310
GlysoPI483463.08G296600	Gs08	45761044	45961044	2.34178e-09	AT3G13300
GlysoPI483463.08G296700	Gs08	45761044	45961044	2.34178e-09	AT3G13300
GlysoPI483463.08G296800	Gs08	45761044	45961044	2.34178e-09	AT3G13300
GlysoPI483463.08G296900	Gs08	45761044	45961044	2.34178e-09	AT3G13235
GlysoPI483463.08G297000	Gs08	45761044	45961044	2.34178e-09	AT5G43822
GlysoPI483463.08G297100	Gs08	45761044	45961044	2.34178e-09
GlysoPI483463.08G297200	Gs08	45761044	45961044	2.34178e-09	AT3G13230
GlysoPI483463.08G297300	Gs08	45761044	45961044	2.34178e-09	AT1G55760
GlysoPI483463.08G297400	Gs08	45761044	45961044	2.34178e-09	AT4G01070
GlysoPI483463.08G297500	Gs08	45761044	45961044	2.34178e-09	AT4G01070
GlysoPI483463.08G297600	Gs08	45761044	45961044	2.34178e-09	AT4G01070
GlysoPI483463.08G297700	Gs08	45761044	45961044	2.34178e-09
GlysoPI483463.08G297800	Gs08	45761044	45961044	2.34178e-09	AT4G01070
GlysoPI483463.08G297900	Gs08	45761044	45961044	2.34178e-09	AT4G01070
GlysoPI483463.08G298000	Gs08	45761044	45961044	2.34178e-09	AT4G01070
GlysoPI483463.08G298100	Gs08	45761044	45961044	2.34178e-09	AT4G01070
GlysoPI483463.08G298200	Gs08	45761044	45961044	2.34178e-09	AT3G60450
GlysoPI483463.08G298300	Gs08	45761044	45961044	2.34178e-09	AT3G18990
GlysoPI483463.08G298400	Gs08	45761044	45961044	2.34178e-09	AT3G18990
GlysoPI483463.08G298500	Gs08	45761044	45961044	2.34178e-09
GlysoPI483463.08G298600	Gs08	45761044	45961044	2.34178e-09
GlysoPI483463.08G298700	Gs08	45761044	45961044	2.34178e-09
GlysoPI483463.08G298800	Gs08	45761044	45961044	2.34178e-09	AT5G40240
GlysoPI483463.08G298800	Gs08	45761044	45961044	2.34178e-09	AT3G28100
GlysoPI483463.09G048900	Gs09	4799094	4999094	6.86113e-07	AT3G54070
GlysoPI483463.09G049000	Gs09	4799094	4999094	6.86113e-07	AT3G54070
GlysoPI483463.09G049100	Gs09	4799094	4999094	6.86113e-07	AT3G54070
GlysoPI483463.09G049200	Gs09	4799094	4999094	6.86113e-07	AT3G54070
GlysoPI483463.09G049300	Gs09	4799094	4999094	6.86113e-07	AT3G54070
GlysoPI483463.09G049400	Gs09	4799094	4999094	6.86113e-07	AT3G54070
GlysoPI483463.09G049500	Gs09	4799094	4999094	6.86113e-07	AT2G22370
GlysoPI483463.09G049600	Gs09	4799094	4999094	6.86113e-07	AT3G54070
GlysoPI483463.09G049700	Gs09	4799094	4999094	6.86113e-07	AT3G50120
GlysoPI483463.09G049800	Gs09	4799094	4999094	6.86113e-07	AT3G54070
GlysoPI483463.09G051300	Gs09	5218837	5418837	1.12715e-09	AT4G30180
GlysoPI483463.09G051400	Gs09	5218837	5418837	1.12715e-09	AT4G25910
GlysoPI483463.09G051500	Gs09	5218837	5418837	1.12715e-09	AT5G57340
GlysoPI483463.09G051600	Gs09	5218837	5418837	1.12715e-09	AT2G18980
GlysoPI483463.09G051700	Gs09	5218837	5418837	1.12715e-09	AT1G62520
GlysoPI483463.09G051800	Gs09	5218837	5418837	1.12715e-09	AT5G57330
GlysoPI483463.09G051900	Gs09	5218837	5418837	1.12715e-09	AT4G30160
GlysoPI483463.09G052000	Gs09	5218837	5418837	1.12715e-09	AT1G71840
GlysoPI483463.09G052100	Gs09	5218837	5418837	1.12715e-09	AT1G17690
GlysoPI483463.09G052200	Gs09	5218837	5418837	1.12715e-09	AT3G20250
GlysoPI483463.09G052300	Gs09	5218837	5418837	1.12715e-09	AT2G19080
GlysoPI483463.09G052400	Gs09	5218837	5418837	1.12715e-09	AT2G19090
GlysoPI483463.09G052500	Gs09	5218837	5418837	1.12715e-09	ATCG01230
GlysoPI483463.09G091200	Gs09	25118747	25318747	1.22964e-07	AT3G25750
GlysoPI483463.09G096300	Gs09	28229006	28429006	1.58244e-07	AT1G70670
GlysoPI483463.10G061300	Gs10	6787292	6987292	6.2017e-08	AT4G25490
GlysoPI483463.10G061400	Gs10	6787292	6987292	6.2017e-08	AT5G03670
GlysoPI483463.10G061500	Gs10	6787292	6987292	6.2017e-08	AT2G36400
GlysoPI483463.10G061600	Gs10	6787292	6987292	6.2017e-08	AT2G36350
GlysoPI483463.10G061700	Gs10	6787292	6987292	6.2017e-08	AT3G52880
GlysoPI483463.10G061800	Gs10	6787292	6987292	6.2017e-08	AT3G44590
GlysoPI483463.10G061900	Gs10	6787292	6987292	6.2017e-08	AT3G52870
GlysoPI483463.10G062000	Gs10	6787292	6987292	6.2017e-08	AT5G03620
GlysoPI483463.10G062100	Gs10	6787292	6987292	6.2017e-08	AT1G19485
GlysoPI483463.10G062200	Gs10	6787292	6987292	6.2017e-08	AT5G60800
GlysoPI483463.10G078300	Gs10	11957144	12157144	1.18156e-06	AT3G60830
GlysoPI483463.10G078400	Gs10	11957144	12157144	1.18156e-06	AT1G51400
GlysoPI483463.10G078500	Gs10	11957144	12157144	1.18156e-06
GlysoPI483463.10G078600	Gs10	11957144	12157144	1.18156e-06	AT3G21055
GlysoPI483463.10G078700	Gs10	11957144	12157144	1.18156e-06	AT5G47970
GlysoPI483463.10G078800	Gs10	11957144	12157144	1.18156e-06	AT3G08010
GlysoPI483463.10G078900	Gs10	11957144	12157144	1.18156e-06	AT1G55530
GlysoPI483463.10G079000	Gs10	11957144	12157144	1.18156e-06	AT3G52080
GlysoPI483463.10G079100	Gs10	11957144	12157144	1.18156e-06	AT3G23890
GlysoPI483463.10G079200	Gs10	11957144	12157144	1.18156e-06	AT3G08030
GlysoPI483463.10G092100	Gs10	25930696	26130696	5.12348e-07	AT4G36520
GlysoPI483463.10G092200	Gs10	25930696	26130696	5.12348e-07	AT5G11240
GlysoPI483463.10G092300	Gs10	25930696	26130696	5.12348e-07
GlysoPI483463.10G092400	Gs10	25930696	26130696	5.12348e-07	AT4G38070
GlysoPI483463.10G092500	Gs10	25930696	26130696	5.12348e-07	AT5G55850
GlysoPI483463.10G092600	Gs10	25930696	26130696	5.12348e-07
GlysoPI483463.10G092700	Gs10	25930696	26130696	5.12348e-07
GlysoPI483463.10G092800	Gs10	25930696	26130696	5.12348e-07
GlysoPI483463.10G113100	Gs10	38312469	38512469	2.77796e-08	AT3G62010
GlysoPI483463.10G113200	Gs10	38312469	38512469	2.77796e-08	AT5G15610
GlysoPI483463.10G113300	Gs10	38312469	38512469	2.77796e-08	AT5G03560
GlysoPI483463.10G113400	Gs10	38312469	38512469	2.77796e-08	AT5G26742
GlysoPI483463.10G113500	Gs10	38312469	38512469	2.77796e-08	AT3G05940
GlysoPI483463.10G113600	Gs10	38312469	38512469	2.77796e-08	AT5G26731
GlysoPI483463.10G113700	Gs10	38312469	38512469	2.77796e-08
GlysoPI483463.10G113800	Gs10	38312469	38512469	2.77796e-08	AT1G09570
GlysoPI483463.10G113900	Gs10	38312469	38512469	2.77796e-08	AT5G26710
GlysoPI483463.10G114000	Gs10	38312469	38512469	2.77796e-08	AT3G62020
GlysoPI483463.10G114100	Gs10	38312469	38512469	2.77796e-08	AT5G26680
GlysoPI483463.10G114200	Gs10	38312469	38512469	2.77796e-08	AT1G59740
GlysoPI483463.10G114300	Gs10	38312469	38512469	2.77796e-08	AT3G05910
GlysoPI483463.10G134700	Gs10	40806659	41006682	1.92756e-07	AT1G54560
GlysoPI483463.10G134800	Gs10	40806659	41006682	1.92756e-07	AT5G32470
GlysoPI483463.10G134900	Gs10	40806659	41006682	1.92756e-07	AT5G18480
GlysoPI483463.10G135000	Gs10	40806659	41006682	1.92756e-07	AT5G18480
GlysoPI483463.10G135100	Gs10	40806659	41006682	1.92756e-07	AT1G08590
GlysoPI483463.10G135200	Gs10	40806659	41006682	1.92756e-07	AT3G04340
GlysoPI483463.10G135300	Gs10	40806659	41006682	1.92756e-07	AT1G08600
GlysoPI483463.10G135400	Gs10	40806659	41006682	1.92756e-07	AT3G04350
GlysoPI483463.10G135500	Gs10	40806659	41006682	1.92756e-07	AT1G04540
GlysoPI483463.10G135600	Gs10	40806659	41006682	1.92756e-07	AT2G33330
GlysoPI483463.10G135700	Gs10	40806659	41006682	1.92756e-07	AT3G04380
GlysoPI483463.10G135800	Gs10	40806659	41006682	1.92756e-07
GlysoPI483463.10G135900	Gs10	40806659	41006682	1.92756e-07	AT5G28910
GlysoPI483463.10G136000	Gs10	40806659	41006682	1.92756e-07	AT3G04470
GlysoPI483463.10G136100	Gs10	40806659	41006682	1.92756e-07	AT3G23250
GlysoPI483463.10G136200	Gs10	40806659	41006682	1.92756e-07	AT1G09770
GlysoPI483463.10G136300	Gs10	40806659	41006682	1.92756e-07	AT1G08630
GlysoPI483463.10G242300	Gs10	51529508	51729509	1.066e-06	AT3G19910
GlysoPI483463.10G242400	Gs10	51529508	51729509	1.066e-06	AT1G50320
GlysoPI483463.10G242500	Gs10	51529508	51729509	1.066e-06	AT3G19940
GlysoPI483463.10G242600	Gs10	51529508	51729509	1.066e-06	AT3G59040
GlysoPI483463.10G242700	Gs10	51529508	51729509	1.066e-06	AT3G19950
GlysoPI483463.10G242800	Gs10	51529508	51729509	1.066e-06
GlysoPI483463.10G242900	Gs10	51529508	51729509	1.066e-06
GlysoPI483463.10G243000	Gs10	51529508	51729509	1.066e-06	AT5G08320
GlysoPI483463.10G243100	Gs10	51529508	51729509	1.066e-06	AT5G23280
GlysoPI483463.10G243200	Gs10	51529508	51729509	1.066e-06	AT5G23290
GlysoPI483463.10G243300	Gs10	51529508	51729509	1.066e-06	AT2G29690
GlysoPI483463.10G243400	Gs10	51529508	51729509	1.066e-06	AT5G23300
GlysoPI483463.10G243500	Gs10	51529508	51729509	1.066e-06	AT3G19960
GlysoPI483463.10G243600	Gs10	51529508	51729509	1.066e-06	AT5G08340
GlysoPI483463.10G243700	Gs10	51529508	51729509	1.066e-06	AT3G19970
GlysoPI483463.10G243800	Gs10	51529508	51729509	1.066e-06	AT5G23340
GlysoPI483463.10G243900	Gs10	51529508	51729509	1.066e-06	AT5G23340
GlysoPI483463.10G244000	Gs10	51529508	51729509	1.066e-06	AT5G64920
GlysoPI483463.10G244100	Gs10	51529508	51729509	1.066e-06	AT5G08350
GlysoPI483463.10G244200	Gs10	51529508	51729509	1.066e-06	AT5G08350
GlysoPI483463.10G244300	Gs10	51529508	51729509	1.066e-06	AT5G08350
GlysoPI483463.10G244400	Gs10	51529508	51729509	1.066e-06	AT5G08580
GlysoPI483463.10G244500	Gs10	51529508	51729509	1.066e-06	AT5G46610
GlysoPI483463.10G244600	Gs10	51529508	51729509	1.066e-06	AT4G17970
GlysoPI483463.10G244700	Gs10	51529508	51729509	1.066e-06	AT5G46610
GlysoPI483463.10G244800	Gs10	51529508	51729509	1.066e-06	AT2G27285
GlysoPI483463.10G244900	Gs10	51529508	51729509	1.066e-06	AT3G20015
GlysoPI483463.10G245000	Gs10	51529508	51729509	1.066e-06	AT1G50410
GlysoPI483463.11G079800	Gs11	6645854	6845854	3.56398e-10	AT3G51480
GlysoPI483463.11G079900	Gs11	6645854	6845854	3.56398e-10	AT2G17520
GlysoPI483463.11G080000	Gs11	6645854	6845854	3.56398e-10	AT5G65980
GlysoPI483463.11G080100	Gs11	6645854	6845854	3.56398e-10	AT1G42960
GlysoPI483463.11G080200	Gs11	6645854	6845854	3.56398e-10	AT2G17480
GlysoPI483463.11G080300	Gs11	6645854	6845854	3.56398e-10	AT1G76410
GlysoPI483463.11G080400	Gs11	6645854	6845854	3.56398e-10	AT3G51490
GlysoPI483463.11G080500	Gs11	6645854	6845854	3.56398e-10	AT2G17270
GlysoPI483463.11G080600	Gs11	6645854	6845854	3.56398e-10	AT4G35470
GlysoPI483463.11G080700	Gs11	6645854	6845854	3.56398e-10	AT1G76490
GlysoPI483463.11G080800	Gs11	6645854	6845854	3.56398e-10
GlysoPI483463.11G080900	Gs11	6645854	6845854	3.56398e-10	AT2G17420
GlysoPI483463.11G081000	Gs11	6645854	6845854	3.56398e-10
GlysoPI483463.11G081100	Gs11	6645854	6845854	3.56398e-10	AT2G17410
GlysoPI483463.11G081200	Gs11	6645854	6845854	3.56398e-10	AT1G76520
GlysoPI483463.11G081300	Gs11	6645854	6845854	3.56398e-10	AT4G38180
GlysoPI483463.11G081400	Gs11	6645854	6845854	3.56398e-10	AT3G51520
GlysoPI483463.11G081500	Gs11	6645854	6845854	3.56398e-10	AT2G04160
GlysoPI483463.11G081600	Gs11	6645854	6845854	3.56398e-10	AT3G51500
GlysoPI483463.11G093500	Gs11	7822461	8022461	2.61677e-09	AT3G19740
GlysoPI483463.11G093600	Gs11	7822461	8022461	2.61677e-09	AT3G13530
GlysoPI483463.11G093700	Gs11	7822461	8022461	2.61677e-09	AT4G10620
GlysoPI483463.11G093800	Gs11	7822461	8022461	2.61677e-09	AT3G63380
GlysoPI483463.11G093900	Gs11	7822461	8022461	2.61677e-09	AT1G17680
GlysoPI483463.11G094000	Gs11	7822461	8022461	2.61677e-09	AT1G50200
GlysoPI483463.11G094100	Gs11	7822461	8022461	2.61677e-09	AT3G19780
GlysoPI483463.11G094200	Gs11	7822461	8022461	2.61677e-09	AT3G19800
GlysoPI483463.11G094300	Gs11	7822461	8022461	2.61677e-09	AT4G10130
GlysoPI483463.11G094400	Gs11	7822461	8022461	2.61677e-09	AT3G19840
GlysoPI483463.11G094500	Gs11	7822461	8022461	2.61677e-09	AT3G07860
GlysoPI483463.11G094600	Gs11	7822461	8022461	2.61677e-09	AT5G18400
GlysoPI483463.11G094700	Gs11	7822461	8022461	2.61677e-09	AT3G19870
GlysoPI483463.11G094800	Gs11	7822461	8022461	2.61677e-09	AT3G07860
GlysoPI483463.11G094900	Gs11	7822461	8022461	2.61677e-09	AT3G19840
GlysoPI483463.11G095000	Gs11	7822461	8022461	2.61677e-09	AT1G09820
GlysoPI483463.11G095100	Gs11	7822461	8022461	2.61677e-09	AT3G19830
GlysoPI483463.11G095200	Gs11	7822461	8022461	2.61677e-09	AT3G19820
GlysoPI483463.11G095300	Gs11	7822461	8022461	2.61677e-09	AT3G18630
GlysoPI483463.11G095400	Gs11	7822461	8022461	2.61677e-09	AT3G62870
GlysoPI483463.11G095500	Gs11	7822461	8022461	2.61677e-09	AT5G48655
GlysoPI483463.11G095600	Gs11	7822461	8022461	2.61677e-09	AT1G50300
GlysoPI483463.11G095700	Gs11	7822461	8022461	2.61677e-09	AT3G19895
GlysoPI483463.11G182400	Gs11	28057337	28257337	1.03849e-09	AT3G53730
GlysoPI483463.11G219800	Gs11	37921799	38121799	1.35509e-07	AT4G39910
GlysoPI483463.11G219900	Gs11	37921799	38121799	1.35509e-07	AT1G34370
GlysoPI483463.11G220000	Gs11	37921799	38121799	1.35509e-07	AT5G10290
GlysoPI483463.11G220100	Gs11	37921799	38121799	1.35509e-07	AT2G22360
GlysoPI483463.11G220200	Gs11	37921799	38121799	1.35509e-07	AT5G10310
GlysoPI483463.11G220300	Gs11	37921799	38121799	1.35509e-07	AT5G10320
GlysoPI483463.11G220400	Gs11	37921799	38121799	1.35509e-07	AT2G22400
GlysoPI483463.11G220500	Gs11	37921799	38121799	1.35509e-07	AT5G65280
GlysoPI483463.11G220600	Gs11	37921799	38121799	1.35509e-07	AT4G40020
GlysoPI483463.11G220700	Gs11	37921799	38121799	1.35509e-07	AT4G40030
GlysoPI483463.11G220800	Gs11	37921799	38121799	1.35509e-07	AT4G40030
GlysoPI483463.11G220900	Gs11	37921799	38121799	1.35509e-07	AT5G65290
GlysoPI483463.11G221000	Gs11	37921799	38121799	1.35509e-07	AT3G06868
GlysoPI483463.11G221100	Gs11	37921799	38121799	1.35509e-07	AT3G18860
GlysoPI483463.11G221200	Gs11	37921799	38121799	1.35509e-07	AT2G22430
GlysoPI483463.11G233900	Gs11	39075306	39275306	1.29415e-08	AT3G32940
GlysoPI483463.11G234000	Gs11	39075306	39275306	1.29415e-08	AT1G55260
GlysoPI483463.11G234100	Gs11	39075306	39275306	1.29415e-08	AT2G42520
GlysoPI483463.11G234200	Gs11	39075306	39275306	1.29415e-08	AT5G39980
GlysoPI483463.11G234300	Gs11	39075306	39275306	1.29415e-08	AT5G17230
GlysoPI483463.11G234400	Gs11	39075306	39275306	1.29415e-08	AT4G35160
GlysoPI483463.11G234500	Gs11	39075306	39275306	1.29415e-08	AT1G04860
GlysoPI483463.11G234600	Gs11	39075306	39275306	1.29415e-08	AT1G55570
GlysoPI483463.11G234700	Gs11	39075306	39275306	1.29415e-08	AT1G55325
GlysoPI483463.12G120400	Gs12	19556653	19756653	1.02149e-07	AT4G27290
GlysoPI483463.12G120500	Gs12	19796467	19996467	7.64886e-09	AT1G65790
GlysoPI483463.12G120600	Gs12	19796467	19996467	7.64886e-09	AT4G02210
GlysoPI483463.12G121000	Gs12	20465192	20665252	2.24692e-11	AT1G49430
GlysoPI483463.12G121100	Gs12	20465192	20665252	2.24692e-11	AT3G20630
GlysoPI483463.12G125200	Gs12	23470034	23670214	4.52964e-10	AT2G24220
GlysoPI483463.12G125300	Gs12	23470034	23670214	4.52964e-10	AT4G30935
GlysoPI483463.12G181100	Gs12	39214273	39414273	8.32034e-07	AT5G25610
GlysoPI483463.12G181200	Gs12	39214273	39414273	8.32034e-07	AT5G25610
GlysoPI483463.12G181300	Gs12	39214273	39414273	8.32034e-07	AT4G27280
GlysoPI483463.12G181400	Gs12	39214273	39414273	8.32034e-07	AT4G27280
GlysoPI483463.12G181500	Gs12	39214273	39414273	8.32034e-07	AT4G27340
GlysoPI483463.12G181600	Gs12	39214273	39414273	8.32034e-07	AT4G03270
GlysoPI483463.12G181700	Gs12	39214273	39414273	8.32034e-07	AT2G17510
GlysoPI483463.12G181800	Gs12	39214273	39414273	8.32034e-07	AT4G21440
GlysoPI483463.12G181900	Gs12	39214273	39414273	8.32034e-07	AT4G10265
GlysoPI483463.12G182000	Gs12	39214273	39414273	8.32034e-07	AT4G10265
GlysoPI483463.12G182100	Gs12	39214273	39414273	8.32034e-07	AT4G10780
GlysoPI483463.12G182200	Gs12	39214273	39414273	8.32034e-07
GlysoPI483463.12G182300	Gs12	39214273	39414273	8.32034e-07	AT4G21450
GlysoPI483463.12G182400	Gs12	39214273	39414273	8.32034e-07	AT5G54240
GlysoPI483463.12G182500	Gs12	39214273	39414273	8.32034e-07	AT4G27360
GlysoPI483463.12G182600	Gs12	39214273	39414273	8.32034e-07
GlysoPI483463.12G182700	Gs12	39214273	39414273	8.32034e-07	AT5G54250
GlysoPI483463.12G182800	Gs12	39214273	39414273	8.32034e-07	AT5G54260
GlysoPI483463.13G004600	Gs13	1751581	1951613	4.08812e-13	AT4G25330
GlysoPI483463.13G004700	Gs13	1751581	1951613	4.08812e-13	AT3G51690
GlysoPI483463.13G004800	Gs13	1751581	1951613	4.08812e-13	AT1G02960
GlysoPI483463.13G004900	Gs13	1751581	1951613	4.08812e-13	AT4G12680
GlysoPI483463.13G009000	Gs13	4421993	4621993	1.28313e-07	AT2G04570
GlysoPI483463.13G011000	Gs13	7922165	8122165	1.54576e-08	AT2G02970
GlysoPI483463.13G098500	Gs13	23808271	24008271	1.13424e-08	AT2G37570
GlysoPI483463.13G098600	Gs13	23808271	24008271	1.13424e-08	AT2G37570
GlysoPI483463.13G098700	Gs13	23808271	24008271	1.13424e-08	AT5G02500
GlysoPI483463.13G098800	Gs13	23808271	24008271	1.13424e-08	AT5G02520
GlysoPI483463.13G098900	Gs13	23808271	24008271	1.13424e-08	AT3G53720
GlysoPI483463.13G099000	Gs13	23808271	24008271	1.13424e-08	AT2G37550
GlysoPI483463.13G099100	Gs13	23808271	24008271	1.13424e-08	AT5G02540
GlysoPI483463.13G099200	Gs13	23808271	24008271	1.13424e-08	AT2G37530
GlysoPI483463.13G099300	Gs13	23808271	24008271	1.13424e-08	AT3G53700
GlysoPI483463.13G099400	Gs13	23808271	24008271	1.13424e-08	AT5G59890
GlysoPI483463.13G099500	Gs13	23808271	24008271	1.13424e-08	AT2G37520
GlysoPI483463.13G099600	Gs13	23808271	24008271	1.13424e-08	AT2G37500
GlysoPI483463.13G099700	Gs13	23808271	24008271	1.13424e-08	AT3G53670
GlysoPI483463.13G099800	Gs13	23808271	24008271	1.13424e-08	AT2G37470
GlysoPI483463.13G099900	Gs13	23808271	24008271	1.13424e-08	AT3G62450
GlysoPI483463.13G100000	Gs13	23808271	24008271	1.13424e-08	AT3G53620
GlysoPI483463.13G100100	Gs13	23808271	24008271	1.13424e-08	AT2G37460
GlysoPI483463.13G100200	Gs13	23808271	24008271	1.13424e-08	AT5G59830
GlysoPI483463.13G100300	Gs13	23808271	24008271	1.13424e-08	AT2G37440
GlysoPI483463.13G100400	Gs13	23808271	24008271	1.13424e-08	AT2G37430
GlysoPI483463.13G100500	Gs13	23808271	24008271	1.13424e-08	AT2G37430
GlysoPI483463.13G100600	Gs13	23808271	24008271	1.13424e-08	AT3G53600
GlysoPI483463.13G100700	Gs13	23808271	24008271	1.13424e-08	AT2G37420
GlysoPI483463.13G167500	Gs13	31800339	32000339	1.89234e-11	AT1G03220
GlysoPI483463.13G167600	Gs13	31800339	32000339	1.89234e-11	AT3G06120
GlysoPI483463.13G167700	Gs13	31800339	32000339	1.89234e-11	AT5G19090
GlysoPI483463.13G167800	Gs13	31800339	32000339	1.89234e-11	AT3G06140
GlysoPI483463.13G167900	Gs13	31800339	32000339	1.89234e-11	AT5G52210
GlysoPI483463.13G168000	Gs13	31800339	32000339	1.89234e-11	AT3G06145
GlysoPI483463.13G168100	Gs13	31800339	32000339	1.89234e-11	AT5G19070
GlysoPI483463.13G168200	Gs13	31800339	32000339	1.89234e-11	AT3G06150
GlysoPI483463.13G168300	Gs13	31800339	32000339	1.89234e-11	AT5G47550
GlysoPI483463.13G168400	Gs13	31800339	32000339	1.89234e-11	AT5G19040
GlysoPI483463.13G168500	Gs13	31800339	32000339	1.89234e-11	AT4G14230
GlysoPI483463.13G168600	Gs13	31800339	32000339	1.89234e-11	AT4G14240
GlysoPI483463.13G168700	Gs13	31800339	32000339	1.89234e-11	AT3G63088
GlysoPI483463.13G168800	Gs13	31800339	32000339	1.89234e-11	AT3G06170
GlysoPI483463.13G168900	Gs13	31800339	32000339	1.89234e-11	AT3G06180
GlysoPI483463.13G169000	Gs13	31800339	32000339	1.89234e-11	AT1G55230
GlysoPI483463.13G169100	Gs13	31800339	32000339	1.89234e-11	AT3G17265
GlysoPI483463.13G169200	Gs13	31800339	32000339	1.89234e-11
GlysoPI483463.13G169300	Gs13	31800339	32000339	1.89234e-11	AT3G23590
GlysoPI483463.14G054200	Gs14	5006883	5206883	6.05723e-07	AT2G39960
GlysoPI483463.14G054300	Gs14	5006883	5206883	6.05723e-07	AT2G39950
GlysoPI483463.14G054400	Gs14	5006883	5206883	6.05723e-07	AT2G39940
GlysoPI483463.14G054500	Gs14	5006883	5206883	6.05723e-07	AT2G38090
GlysoPI483463.14G054600	Gs14	5006883	5206883	6.05723e-07	AT2G38080
GlysoPI483463.14G054700	Gs14	5006883	5206883	6.05723e-07	AT2G25770
GlysoPI483463.14G054800	Gs14	5006883	5206883	6.05723e-07	AT1G36280
GlysoPI483463.14G054900	Gs14	5006883	5206883	6.05723e-07	AT2G39920
GlysoPI483463.14G055000	Gs14	5006883	5206883	6.05723e-07	AT3G55770
GlysoPI483463.14G055100	Gs14	5006883	5206883	6.05723e-07	AT3G11320
GlysoPI483463.14G055200	Gs14	5006883	5206883	6.05723e-07	AT1G74270
GlysoPI483463.14G055300	Gs14	5006883	5206883	6.05723e-07	AT2G37980
GlysoPI483463.14G055400	Gs14	5006883	5206883	6.05723e-07	AT3G54085
GlysoPI483463.14G055500	Gs14	5006883	5206883	6.05723e-07	AT2G39890
GlysoPI483463.14G055600	Gs14	5006883	5206883	6.05723e-07
GlysoPI483463.14G055700	Gs14	5006883	5206883	6.05723e-07	AT3G55730
GlysoPI483463.14G055800	Gs14	5006883	5206883	6.05723e-07	AT5G05830
GlysoPI483463.14G055900	Gs14	5006883	5206883	6.05723e-07	AT5G05840
GlysoPI483463.14G056000	Gs14	5006883	5206883	6.05723e-07	AT1G53540
GlysoPI483463.14G056100	Gs14	5006883	5206883	6.05723e-07	AT1G53540
GlysoPI483463.14G056200	Gs14	5006883	5206883	6.05723e-07	AT2G39870
GlysoPI483463.14G056300	Gs14	5006883	5206883	6.05723e-07	AT5G05940
GlysoPI483463.14G056400	Gs14	5006883	5206883	6.05723e-07	AT2G39855
GlysoPI483463.14G066600	Gs14	6320904	6520904	1.85023e-07	AT2G18460
GlysoPI483463.14G066700	Gs14	6320904	6520904	1.85023e-07	AT5G42950
GlysoPI483463.14G066800	Gs14	6320904	6520904	1.85023e-07	AT4G36660
GlysoPI483463.14G066900	Gs14	6320904	6520904	1.85023e-07	AT5G42960
GlysoPI483463.14G067000	Gs14	6320904	6520904	1.85023e-07	AT1G75140
GlysoPI483463.14G067100	Gs14	6320904	6520904	1.85023e-07	AT1G47740
GlysoPI483463.14G067200	Gs14	6320904	6520904	1.85023e-07	AT1G19360
GlysoPI483463.14G067300	Gs14	6320904	6520904	1.85023e-07	AT4G16580
GlysoPI483463.14G067400	Gs14	6320904	6520904	1.85023e-07	AT1G47750
GlysoPI483463.14G067500	Gs14	6320904	6520904	1.85023e-07	AT1G75080
GlysoPI483463.14G067600	Gs14	6320904	6520904	1.85023e-07	AT1G19340
GlysoPI483463.14G067700	Gs14	6320904	6520904	1.85023e-07	AT2G23790
GlysoPI483463.14G067800	Gs14	6320904	6520904	1.85023e-07	AT5G42620
GlysoPI483463.14G067900	Gs14	6320904	6520904	1.85023e-07	AT1G75030
GlysoPI483463.14G070400	Gs14	6873947	7077062	8.18803e-10	AT1G47720
GlysoPI483463.14G070500	Gs14	6873947	7077062	8.18803e-10	AT3G11960
GlysoPI483463.14G070600	Gs14	6873947	7077062	8.18803e-10
GlysoPI483463.14G070700	Gs14	6873947	7077062	8.18803e-10	AT1G10490
GlysoPI483463.14G095400	Gs14	12024152	12224242	1.63212e-08	AT2G26280
GlysoPI483463.14G095500	Gs14	12024152	12224242	1.63212e-08	AT1G72510
GlysoPI483463.14G095600	Gs14	12024152	12224242	1.63212e-08
GlysoPI483463.14G095700	Gs14	12024152	12224242	1.63212e-08	AT5G58130
GlysoPI483463.14G095800	Gs14	12024152	12224242	1.63212e-08	AT5G20650
GlysoPI483463.14G095900	Gs14	12024152	12224242	1.63212e-08	AT1G48270
GlysoPI483463.14G096000	Gs14	12024152	12224242	1.63212e-08	AT2G05940
GlysoPI483463.14G104700	Gs14	17017314	17217314	5.00755e-07
GlysoPI483463.14G110500	Gs14	20738397	20944597	8.1275e-09	AT4G31570
GlysoPI483463.14G110700	Gs14	20974326	21174326	9.71664e-11	AT4G31580
GlysoPI483463.14G123700	Gs14	31736997	31936997	6.12298e-07	AT3G49260
GlysoPI483463.14G126200	Gs14	34726425	34926427	2.97012e-09	AT2G05642
GlysoPI483463.14G126300	Gs14	34726425	34926427	2.97012e-09	AT1G77120
GlysoPI483463.14G126400	Gs14	34726425	34926427	2.97012e-09	AT1G43800
GlysoPI483463.14G126500	Gs14	34726425	34926427	2.97012e-09	AT4G10180
GlysoPI483463.14G126600	Gs14	34726425	34926427	2.97012e-09	AT1G43790
GlysoPI483463.15G054100	Gs15	4491475	4691475	2.11088e-08	AT2G22540
GlysoPI483463.15G054200	Gs15	4491475	4691475	2.11088e-08	AT2G22540
GlysoPI483463.15G054300	Gs15	4491475	4691475	2.11088e-08	AT4G33620
GlysoPI483463.15G054400	Gs15	4491475	4691475	2.11088e-08	AT2G14110
GlysoPI483463.15G054500	Gs15	4491475	4691475	2.11088e-08	AT4G38070
GlysoPI483463.15G054600	Gs15	4491475	4691475	2.11088e-08	AT5G64390
GlysoPI483463.15G054700	Gs15	4491475	4691475	2.11088e-08	AT4G33650
GlysoPI483463.15G054800	Gs15	4491475	4691475	2.11088e-08	AT5G17050
GlysoPI483463.15G054900	Gs15	4491475	4691475	2.11088e-08	AT2G14170
GlysoPI483463.15G055000	Gs15	4491475	4691475	2.11088e-08	AT4G31070
GlysoPI483463.15G055100	Gs15	4491475	4691475	2.11088e-08	AT1G18265
GlysoPI483463.15G055200	Gs15	4491475	4691475	2.11088e-08	AT5G10530
GlysoPI483463.15G055300	Gs15	4491475	4691475	2.11088e-08	AT5G14050
GlysoPI483463.15G055400	Gs15	4491475	4691475	2.11088e-08	AT1G72680
GlysoPI483463.15G055500	Gs15	4491475	4691475	2.11088e-08	AT4G37940
GlysoPI483463.15G055600	Gs15	4491475	4691475	2.11088e-08	AT5G64410
GlysoPI483463.15G055700	Gs15	4491475	4691475	2.11088e-08	AT5G64410
GlysoPI483463.15G055800	Gs15	4491475	4691475	2.11088e-08	AT5G09590
GlysoPI483463.15G055900	Gs15	4491475	4691475	2.11088e-08	AT2G04305
GlysoPI483463.15G056000	Gs15	4491475	4691475	2.11088e-08	AT5G64420
GlysoPI483463.15G056100	Gs15	4491475	4691475	2.11088e-08	AT5G65630
GlysoPI483463.15G056200	Gs15	4491475	4691475	2.11088e-08	AT1G06230
GlysoPI483463.15G168600	Gs15	20105360	20305360	8.31678e-07
GlysoPI483463.15G168700	Gs15	20105360	20305360	8.31678e-07	AT3G06483
GlysoPI483463.15G168800	Gs15	20105360	20305360	8.31678e-07	AT1G48170
GlysoPI483463.15G168900	Gs15	20105360	20305360	8.31678e-07	AT3G17430
GlysoPI483463.15G169000	Gs15	20338757	20538757	3.39227e-08	AT1G56720
GlysoPI483463.15G169100	Gs15	20338757	20538757	3.39227e-08	AT3G29638
GlysoPI483463.15G169200	Gs15	20338757	20538757	3.39227e-08	AT1G59960
GlysoPI483463.15G169300	Gs15	20338757	20538757	3.39227e-08	AT2G36060
GlysoPI483463.15G175500	Gs15	24098777	24298777	5.75433e-14	AT1G32050
GlysoPI483463.15G175600	Gs15	24098777	24298777	5.75433e-14	AT4G39630
GlysoPI483463.15G175700	Gs15	24098777	24298777	5.75433e-14	AT3G22142
GlysoPI483463.15G189600	Gs15	38112439	38312439	2.77204e-07	AT1G79350
GlysoPI483463.15G189700	Gs15	38112439	38312439	2.77204e-07	AT1G79380
GlysoPI483463.15G189900	Gs15	38537179	38737361	3.95326e-15
GlysoPI483463.15G190000	Gs15	38537179	38737361	3.95326e-15	AT2G18990
GlysoPI483463.15G190100	Gs15	38537179	38737361	3.95326e-15
GlysoPI483463.15G190400	Gs15	39926660	40152406	2.49548e-08	AT4G12560
GlysoPI483463.16G068400	Gs16	7981755	8181755	1.22404e-06	AT2G37410
GlysoPI483463.16G068500	Gs16	7981755	8181755	1.22404e-06	AT5G25930
GlysoPI483463.16G068600	Gs16	7981755	8181755	1.22404e-06	AT5G25930
GlysoPI483463.16G068700	Gs16	7981755	8181755	1.22404e-06	AT5G48385
GlysoPI483463.16G068800	Gs16	7981755	8181755	1.22404e-06	AT5G48380
GlysoPI483463.16G068900	Gs16	7981755	8181755	1.22404e-06	AT3G14460
GlysoPI483463.16G069000	Gs16	7981755	8181755	1.22404e-06	AT5G41761
GlysoPI483463.16G069100	Gs16	7981755	8181755	1.22404e-06	AT4G27950
GlysoPI483463.17G065100	Gs17	5652013	5852013	2.08317e-08	AT1G16060
GlysoPI483463.17G065200	Gs17	5652013	5852013	2.08317e-08	AT4G30850
GlysoPI483463.17G065300	Gs17	5652013	5852013	2.08317e-08	AT4G30845
GlysoPI483463.17G065400	Gs17	5652013	5852013	2.08317e-08	AT4G30840
GlysoPI483463.17G065500	Gs17	5652013	5852013	2.08317e-08	AT2G24090
GlysoPI483463.17G065600	Gs17	5652013	5852013	2.08317e-08	AT4G30780
GlysoPI483463.17G065700	Gs17	5652013	5852013	2.08317e-08	AT2G24100
GlysoPI483463.17G065800	Gs17	5652013	5852013	2.08317e-08	AT4G30790
GlysoPI483463.17G065900	Gs17	5652013	5852013	2.08317e-08	AT2G24120
GlysoPI483463.17G066000	Gs17	5652013	5852013	2.08317e-08	AT2G24130
GlysoPI483463.17G066100	Gs17	5652013	5852013	2.08317e-08	AT5G57830
GlysoPI483463.17G066200	Gs17	5652013	5852013	2.08317e-08	AT3G18430
GlysoPI483463.17G066300	Gs17	5652013	5852013	2.08317e-08	AT4G30710
GlysoPI483463.17G066400	Gs17	5652013	5852013	2.08317e-08	AT4G30700
GlysoPI483463.17G066500	Gs17	5652013	5852013	2.08317e-08	AT5G17420
GlysoPI483463.17G066600	Gs17	5652013	5852013	2.08317e-08	AT4G30690
GlysoPI483463.17G066700	Gs17	5652013	5852013	2.08317e-08	AT1G16030
GlysoPI483463.17G066800	Gs17	5652013	5852013	2.08317e-08	AT5G57870
GlysoPI483463.17G066900	Gs17	5652013	5852013	2.08317e-08	AT5G57880
GlysoPI483463.17G067000	Gs17	5652013	5852013	2.08317e-08	AT2G24030
GlysoPI483463.17G067100	Gs17	5652013	5852013	2.08317e-08	AT5G57910
GlysoPI483463.17G067200	Gs17	5652013	5852013	2.08317e-08
GlysoPI483463.17G067300	Gs17	5652013	5852013	2.08317e-08	AT4G30610
GlysoPI483463.17G067400	Gs17	5652013	5852013	2.08317e-08	AT4G30600
GlysoPI483463.17G067500	Gs17	5652013	5852013	2.08317e-08	AT4G31840
GlysoPI483463.17G067600	Gs17	5652013	5852013	2.08317e-08	AT5G57940
GlysoPI483463.17G163800	Gs17	24166667	24366667	6.92518e-08	AT5G16715
GlysoPI483463.17G163900	Gs17	24166667	24366667	6.92518e-08	AT5G16715
GlysoPI483463.17G164000	Gs17	24166667	24366667	6.92518e-08	AT5G16715
GlysoPI483463.17G164100	Gs17	24166667	24366667	6.92518e-08	AT3G03770
GlysoPI483463.17G183700	Gs17	36858659	37058669	1.8284e-07	AT4G29160
GlysoPI483463.17G183800	Gs17	36858659	37058669	1.8284e-07	AT4G19810
GlysoPI483463.17G183900	Gs17	36858659	37058669	1.8284e-07	AT2G25180
GlysoPI483463.17G184000	Gs17	36858659	37058669	1.8284e-07	AT4G31910
GlysoPI483463.17G184100	Gs17	36858659	37058669	1.8284e-07	AT2G25170
GlysoPI483463.18G083200	Gs18	9648897	9848897	5.45015e-07	AT1G09157
GlysoPI483463.18G083300	Gs18	9648897	9848897	5.45015e-07	AT5G36210
GlysoPI483463.18G083400	Gs18	9648897	9848897	5.45015e-07
GlysoPI483463.18G083500	Gs18	9648897	9848897	5.45015e-07	AT1G11660
GlysoPI483463.18G083600	Gs18	9648897	9848897	5.45015e-07	AT5G54930
GlysoPI483463.18G083700	Gs18	9648897	9848897	5.45015e-07	AT4G26990
GlysoPI483463.18G088000	Gs18	11205400	11405434	5.44755e-08	AT3G58780
GlysoPI483463.18G088100	Gs18	11205400	11405434	5.44755e-08	AT3G58790
GlysoPI483463.18G088200	Gs18	11205400	11405434	5.44755e-08
GlysoPI483463.18G088300	Gs18	11205400	11405434	5.44755e-08	AT1G78570
GlysoPI483463.18G088400	Gs18	11205400	11405434	5.44755e-08	AT2G42840
GlysoPI483463.18G088500	Gs18	11205400	11405434	5.44755e-08	AT4G14130
GlysoPI483463.18G088600	Gs18	11205400	11405434	5.44755e-08	AT3G58840
GlysoPI483463.18G088700	Gs18	11205400	11405434	5.44755e-08	AT2G42880
GlysoPI483463.18G090100	Gs18	11735883	11935929	1.16859e-08	AT1G04920
GlysoPI483463.18G090200	Gs18	11735883	11935929	1.16859e-08	AT4G26900
GlysoPI483463.18G090300	Gs18	11735883	11935929	1.16859e-08
GlysoPI483463.18G090400	Gs18	11735883	11935929	1.16859e-08	AT5G50890
GlysoPI483463.18G103100	Gs18	17352943	17553127	1.69445e-09	AT1G27200
GlysoPI483463.18G103200	Gs18	17352943	17553127	1.69445e-09	AT1G03750
GlysoPI483463.18G103300	Gs18	17352943	17553127	1.69445e-09	AT1G24190
GlysoPI483463.18G111800	Gs18	22600588	22800588	1.47212e-10	AT2G34440
GlysoPI483463.18G111900	Gs18	22600588	22800588	1.47212e-10	AT1G70620
GlysoPI483463.18G116100	Gs18	27100764	27300764	6.01117e-08	AT5G10530
GlysoPI483463.18G129700	Gs18	39647042	39847042	1.36125e-06	AT2G23470
GlysoPI483463.18G129800	Gs18	39647042	39847042	1.36125e-06	AT2G32700
GlysoPI483463.18G131600	Gs18	40803728	41003728	3.73828e-09	AT5G46550
GlysoPI483463.18G131700	Gs18	40803728	41003728	3.73828e-09	AT5G46550
GlysoPI483463.18G131800	Gs18	40803728	41003728	3.73828e-09	AT5G46550
GlysoPI483463.18G131900	Gs18	40803728	41003728	3.73828e-09	AT3G24715
GlysoPI483463.18G132000	Gs18	40803728	41003728	3.73828e-09	AT5G48890
GlysoPI483463.18G132100	Gs18	40803728	41003728	3.73828e-09	AT4G30480
GlysoPI483463.18G147700	Gs18	46765182	46965182	5.28154e-09	AT4G08850
GlysoPI483463.18G147800	Gs18	46765182	46965182	5.28154e-09	AT4G00430
GlysoPI483463.18G147900	Gs18	46765182	46965182	5.28154e-09	AT2G38120
GlysoPI483463.18G148000	Gs18	46765182	46965182	5.28154e-09	AT4G28010
GlysoPI483463.18G148100	Gs18	46765182	46965182	5.28154e-09
GlysoPI483463.18G169700	Gs18	50283734	50483734	3.20907e-12	AT2G45550
GlysoPI483463.18G169800	Gs18	50283734	50483734	3.20907e-12	AT3G61040
GlysoPI483463.18G169900	Gs18	50283734	50483734	3.20907e-12	AT2G45550
GlysoPI483463.18G170000	Gs18	50283734	50483734	3.20907e-12	AT2G45540
GlysoPI483463.18G170100	Gs18	50283734	50483734	3.20907e-12	AT3G18030
GlysoPI483463.18G170200	Gs18	50283734	50483734	3.20907e-12	AT3G18030
GlysoPI483463.18G170300	Gs18	50283734	50483734	3.20907e-12	AT3G18030
GlysoPI483463.18G170400	Gs18	50283734	50483734	3.20907e-12	AT1G48605
GlysoPI483463.18G170500	Gs18	50283734	50483734	3.20907e-12	AT1G08500
GlysoPI483463.18G170600	Gs18	50283734	50483734	3.20907e-12	AT3G61050
GlysoPI483463.19G052600	Gs19	21340571	21591455	2.91727e-08	AT5G04190
GlysoPI483463.19G084400	Gs19	36449102	36649102	3.25022e-07	AT3G03740
GlysoPI483463.19G084500	Gs19	36449102	36649102	3.25022e-07	AT1G58030
GlysoPI483463.19G084600	Gs19	36449102	36649102	3.25022e-07	AT1G58030
GlysoPI483463.19G084700	Gs19	36449102	36649102	3.25022e-07	AT1G80750
GlysoPI483463.19G084800	Gs19	36449102	36649102	3.25022e-07	AT3G03710
GlysoPI483463.19G084900	Gs19	36449102	36649102	3.25022e-07	AT2G44440
GlysoPI483463.19G085000	Gs19	36449102	36649102	3.25022e-07	AT5G17860
GlysoPI483463.19G085100	Gs19	36449102	36649102	3.25022e-07	AT5G17850
GlysoPI483463.19G085200	Gs19	36449102	36649102	3.25022e-07	AT5G17840
GlysoPI483463.19G085300	Gs19	36449102	36649102	3.25022e-07	AT3G04440
GlysoPI483463.19G085300	Gs19	36449102	36649102	3.25022e-07	AT3G03700
GlysoPI483463.19G085400	Gs19	36449102	36649102	3.25022e-07	AT2G40720
GlysoPI483463.19G085500	Gs19	36449102	36649102	3.25022e-07	AT3G03690
GlysoPI483463.19G085600	Gs19	36449102	36649102	3.25022e-07	AT3G09360
GlysoPI483463.19G180000	Gs19	46578523	46778523	1.53231e-08	AT2G47180
GlysoPI483463.19G180100	Gs19	46578523	46778523	1.53231e-08	AT1G10630
GlysoPI483463.19G180200	Gs19	46578523	46778523	1.53231e-08	AT3G62270
GlysoPI483463.19G180300	Gs19	46578523	46778523	1.53231e-08	AT1G02450
GlysoPI483463.19G180400	Gs19	46578523	46778523	1.53231e-08	AT1G02460
GlysoPI483463.19G180500	Gs19	46578523	46778523	1.53231e-08	AT2G47140
GlysoPI483463.19G180600	Gs19	46578523	46778523	1.53231e-08	AT2G47115
GlysoPI483463.19G180700	Gs19	46578523	46778523	1.53231e-08	AT3G62240
GlysoPI483463.19G180800	Gs19	46578523	46778523	1.53231e-08	AT4G01860
GlysoPI483463.19G180900	Gs19	46578523	46778523	1.53231e-08	AT4G01850
GlysoPI483463.19G181000	Gs19	46578523	46778523	1.53231e-08	AT3G62220
GlysoPI483463.19G181100	Gs19	46578523	46778523	1.53231e-08	AT3G17430
GlysoPI483463.19G181200	Gs19	46578523	46778523	1.53231e-08	AT5G27870
GlysoPI483463.19G181300	Gs19	46578523	46778523	1.53231e-08	AT2G47020
GlysoPI483463.19G181400	Gs19	46578523	46778523	1.53231e-08	AT1G75250
GlysoPI483463.19G181500	Gs19	46578523	46778523	1.53231e-08	AT4G02750
GlysoPI483463.19G181600	Gs19	46578523	46778523	1.53231e-08	AT4G01840
GlysoPI483463.19G181700	Gs19	46578523	46778523	1.53231e-08	AT3G62160
GlysoPI483463.19G181800	Gs19	46578523	46778523	1.53231e-08	AT3G62140
GlysoPI483463.19G181900	Gs19	46578523	46778523	1.53231e-08	AT4G01810
GlysoPI483463.19G182000	Gs19	46578523	46778523	1.53231e-08	AT3G62120
GlysoPI483463.19G211200	Gs19	49432104	49632104	1.94754e-08	AT1G61720
GlysoPI483463.19G211300	Gs19	49432104	49632104	1.94754e-08	AT1G61720
GlysoPI483463.19G211400	Gs19	49432104	49632104	1.94754e-08	AT4G11070
GlysoPI483463.19G211500	Gs19	49432104	49632104	1.94754e-08	AT3G03300
GlysoPI483463.19G211600	Gs19	49432104	49632104	1.94754e-08	AT4G01040
GlysoPI483463.19G211700	Gs19	49432104	49632104	1.94754e-08	AT3G61680
GlysoPI483463.19G211800	Gs19	49432104	49632104	1.94754e-08	AT2G46420
GlysoPI483463.19G211900	Gs19	49432104	49632104	1.94754e-08	AT5G53130
GlysoPI483463.19G212000	Gs19	49432104	49632104	1.94754e-08	AT5G53130
GlysoPI483463.19G212100	Gs19	49432104	49632104	1.94754e-08	AT5G53130
GlysoPI483463.19G212200	Gs19	49432104	49632104	1.94754e-08	AT4G01000
GlysoPI483463.19G212300	Gs19	49432104	49632104	1.94754e-08	AT2G46495
GlysoPI483463.19G212400	Gs19	49432104	49632104	1.94754e-08	AT3G61750
GlysoPI483463.19G212500	Gs19	49432104	49632104	1.94754e-08	AT3G61770
GlysoPI483463.19G212600	Gs19	49432104	49632104	1.94754e-08	AT2G46500
GlysoPI483463.19G212700	Gs19	49432104	49632104	1.94754e-08	AT3G61790
GlysoPI483463.19G212800	Gs19	49432104	49632104	1.94754e-08	AT3G61800
GlysoPI483463.19G212900	Gs19	49432104	49632104	1.94754e-08	AT1G01300
GlysoPI483463.19G213000	Gs19	49432104	49632104	1.94754e-08	AT4G00980
GlysoPI483463.19G213100	Gs19	49432104	49632104	1.94754e-08	AT3G49250
GlysoPI483463.19G213200	Gs19	49432104	49632104	1.94754e-08	AT1G01260
GlysoPI483463.19G213300	Gs19	49432104	49632104	1.94754e-08	AT1G01250
GlysoPI483463.19G213400	Gs19	49432104	49632104	1.94754e-08	AT5G44220
GlysoPI483463.19G213500	Gs19	49432104	49632104	1.94754e-08	AT4G27810
GlysoPI483463.19G213600	Gs19	49432104	49632104	1.94754e-08	AT2G46540
GlysoPI483463.19G213700	Gs19	49432104	49632104	1.94754e-08	AT2G46550
GlysoPI483463.20G018700	Gs20	2637924	2837924	7.22009e-08	AT5G45190
GlysoPI483463.20G018800	Gs20	2637924	2837924	7.22009e-08	AT4G38260
GlysoPI483463.20G018900	Gs20	2637924	2837924	7.22009e-08	AT1G30480
GlysoPI483463.20G019000	Gs20	2637924	2837924	7.22009e-08
GlysoPI483463.20G019100	Gs20	2637924	2837924	7.22009e-08	AT2G35540
GlysoPI483463.20G019200	Gs20	2637924	2837924	7.22009e-08	AT4G26370
GlysoPI483463.20G019300	Gs20	2637924	2837924	7.22009e-08	AT5G56360
GlysoPI483463.20G019400	Gs20	2637924	2837924	7.22009e-08	AT1G52520
GlysoPI483463.20G019500	Gs20	2637924	2837924	7.22009e-08	AT5G56350
GlysoPI483463.20G019600	Gs20	2637924	2837924	7.22009e-08	AT1G55535
GlysoPI483463.20G019700	Gs20	2637924	2837924	7.22009e-08	AT4G26410
GlysoPI483463.20G019800	Gs20	2637924	2837924	7.22009e-08	AT2G32080
GlysoPI483463.20G043100	Gs20	19593302	19793349	2.63516e-12	AT3G07740
GlysoPI483463.20G053200	Gs20	29474274	29674274	1.45258e-10	AT5G20230
GlysoPI483463.20G053300	Gs20	29474274	29674274	1.45258e-10
GlysoPI483463.20G061300	Gs20	33587996	33787996	4.31632e-07	AT4G14410
GlysoPI483463.20G061400	Gs20	33587996	33787996	4.31632e-07	AT1G04360
GlysoPI483463.20G061500	Gs20	33587996	33787996	4.31632e-07	AT4G01630
GlysoPI483463.20G061600	Gs20	33587996	33787996	4.31632e-07	AT5G03050
GlysoPI483463.20G061700	Gs20	33587996	33787996	4.31632e-07	AT3G62010
GlysoPI483463.20G061800	Gs20	33587996	33787996	4.31632e-07	AT5G15610
GlysoPI483463.20G061900	Gs20	33587996	33787996	4.31632e-07	AT5G03560
GlysoPI483463.20G062000	Gs20	33587996	33787996	4.31632e-07	AT5G26742
GlysoPI483463.20G134400	Gs20	41464961	41664961	1.03239e-07	AT1G76710
GlysoPI483463.20G134500	Gs20	41464961	41664961	1.03239e-07	AT5G42440
GlysoPI483463.20G134600	Gs20	41464961	41664961	1.03239e-07	AT1G71695
GlysoPI483463.20G134700	Gs20	41464961	41664961	1.03239e-07	AT4G09890
GlysoPI483463.20G134800	Gs20	41464961	41664961	1.03239e-07	AT1G53050
GlysoPI483463.20G134900	Gs20	41464961	41664961	1.03239e-07	AT1G34000
GlysoPI483463.20G135000	Gs20	41464961	41664961	1.03239e-07	AT1G22790
GlysoPI483463.20G135100	Gs20	41464961	41664961	1.03239e-07	AT4G09830
GlysoPI483463.20G135200	Gs20	41464961	41664961	1.03239e-07	AT1G22780
GlysoPI483463.20G135300	Gs20	41464961	41664961	1.03239e-07	AT1G22770
GlysoPI483463.20G135400	Gs20	41464961	41664961	1.03239e-07	AT1G71696
GlysoPI483463.20G135500	Gs20	41464961	41664961	1.03239e-07	AT1G74320
GlysoPI483463.20G135600	Gs20	41464961	41664961	1.03239e-07	AT4G10380
GlysoPI483463.20G135700	Gs20	41464961	41664961	1.03239e-07	AT1G71710
GlysoPI483463.20G135800	Gs20	41464961	41664961	1.03239e-07	AT1G71720
GlysoPI483463.20G135900	Gs20	41464961	41664961	1.03239e-07	AT5G58590

## Sheet: S6
Dataset S6. The best blastp hits in Arabidopsis thaliana for genes in SALs for latitude.
gene	Chr	Start	End	p.value	arabidopsis_locus
GlysoPI483463.01G046900	Gs01	6691476	6891560	2.08976e-09	AT1G69440
GlysoPI483463.01G047000	Gs01	6691476	6891560	2.08976e-09	AT1G26660
GlysoPI483463.01G047100	Gs01	6691476	6891560	2.08976e-09	AT1G69420
GlysoPI483463.01G049600	Gs01	7494900	7694900	1.15264e-06	AT1G26610
GlysoPI483463.01G049700	Gs01	7494900	7694900	1.15264e-06	AT3G29360
GlysoPI483463.01G049800	Gs01	7494900	7694900	1.15264e-06	AT1G26560
GlysoPI483463.01G056000	Gs01	10533827	10733827	7.79377e-08	AT1G69940
GlysoPI483463.01G056100	Gs01	10533827	10733827	7.79377e-08	AT5G15740
GlysoPI483463.01G056200	Gs01	10533827	10733827	7.79377e-08	AT1G69010
GlysoPI483463.01G059300	Gs01	13373865	13573865	5.62093e-07	AT5G05400
GlysoPI483463.01G059400	Gs01	13373865	13573865	5.62093e-07	AT1G48490
GlysoPI483463.01G141300	Gs01	52484741	52684741	4.79058e-08	AT4G36850
GlysoPI483463.01G141400	Gs01	52484741	52684741	4.79058e-08	AT5G09280
GlysoPI483463.01G141500	Gs01	52484741	52684741	4.79058e-08	AT2G23770
GlysoPI483463.01G141600	Gs01	52484741	52684741	4.79058e-08	AT2G33580
GlysoPI483463.01G141700	Gs01	52484741	52684741	4.79058e-08	AT5G66631
GlysoPI483463.01G141800	Gs01	52484741	52684741	4.79058e-08	AT3G11130
GlysoPI483463.01G141900	Gs01	52484741	52684741	4.79058e-08	AT3G26300
GlysoPI483463.01G142000	Gs01	52484741	52684741	4.79058e-08	AT3G26300
GlysoPI483463.01G142100	Gs01	52484741	52684741	4.79058e-08	AT3G26310
GlysoPI483463.01G142200	Gs01	52484741	52684741	4.79058e-08	AT3G26300
GlysoPI483463.01G142300	Gs01	52484741	52684741	4.79058e-08	AT4G36860
GlysoPI483463.01G142400	Gs01	52484741	52684741	4.79058e-08	AT4G36870
GlysoPI483463.01G142500	Gs01	52484741	52684741	4.79058e-08	AT3G50780
GlysoPI483463.01G142600	Gs01	52484741	52684741	4.79058e-08	AT2G23740
GlysoPI483463.01G142700	Gs01	52484741	52684741	4.79058e-08	AT5G66600
GlysoPI483463.01G142800	Gs01	52484741	52684741	4.79058e-08	AT2G28625
GlysoPI483463.01G142900	Gs01	52484741	52684741	4.79058e-08	AT5G66590
GlysoPI483463.01G143000	Gs01	52484741	52684741	4.79058e-08	AT3G50800
GlysoPI483463.01G202500	Gs01	57741822	57941822	6.097e-07	AT4G34150
GlysoPI483463.01G202600	Gs01	57741822	57941822	6.097e-07	AT3G19320
GlysoPI483463.01G202700	Gs01	57741822	57941822	6.097e-07	AT3G19210
GlysoPI483463.01G202800	Gs01	57741822	57941822	6.097e-07	AT3G19184
GlysoPI483463.01G202900	Gs01	57741822	57941822	6.097e-07	AT1G49630
GlysoPI483463.01G203000	Gs01	57741822	57941822	6.097e-07	AT4G38130
GlysoPI483463.01G203100	Gs01	57741822	57941822	6.097e-07	AT1G76630
GlysoPI483463.01G203200	Gs01	57741822	57941822	6.097e-07	AT2G27610
GlysoPI483463.01G203300	Gs01	57741822	57941822	6.097e-07	AT5G25070
GlysoPI483463.01G203400	Gs01	57741822	57941822	6.097e-07	AT1G21070
GlysoPI483463.01G203500	Gs01	57741822	57941822	6.097e-07	AT1G21080
GlysoPI483463.01G203600	Gs01	57741822	57941822	6.097e-07	AT1G76700
GlysoPI483463.02G049000	Gs02	4972765	5172765	1.35519e-07	AT4G36530
GlysoPI483463.02G049100	Gs02	4972765	5172765	1.35519e-07	AT2G18280
GlysoPI483463.02G049200	Gs02	4972765	5172765	1.35519e-07	AT2G18290
GlysoPI483463.02G049300	Gs02	4972765	5172765	1.35519e-07	AT4G36550
GlysoPI483463.02G049400	Gs02	4972765	5172765	1.35519e-07	AT1G75250
GlysoPI483463.02G049500	Gs02	4972765	5172765	1.35519e-07	AT1G75250
GlysoPI483463.02G049600	Gs02	4972765	5172765	1.35519e-07	AT2G18350
GlysoPI483463.02G049700	Gs02	4972765	5172765	1.35519e-07	AT1G75220
GlysoPI483463.02G049800	Gs02	4972765	5172765	1.35519e-07	AT1G75220
GlysoPI483463.02G049900	Gs02	4972765	5172765	1.35519e-07	AT2G18360
GlysoPI483463.02G050000	Gs02	4972765	5172765	1.35519e-07	AT3G50870
GlysoPI483463.02G050100	Gs02	4972765	5172765	1.35519e-07	AT5G66550
GlysoPI483463.02G050200	Gs02	4972765	5172765	1.35519e-07	AT5G49555
GlysoPI483463.02G050300	Gs02	4972765	5172765	1.35519e-07	AT3G50860
GlysoPI483463.02G050400	Gs02	4972765	5172765	1.35519e-07	AT5G49560
GlysoPI483463.02G050500	Gs02	4972765	5172765	1.35519e-07	AT1G55520
GlysoPI483463.02G050600	Gs02	4972765	5172765	1.35519e-07	AT4G36640
GlysoPI483463.02G050700	Gs02	4972765	5172765	1.35519e-07	AT3G48880
GlysoPI483463.02G050800	Gs02	4972765	5172765	1.35519e-07	AT5G66760
GlysoPI483463.02G050900	Gs02	4972765	5172765	1.35519e-07	AT3G50660
GlysoPI483463.02G051000	Gs02	4972765	5172765	1.35519e-07	AT3G50670
GlysoPI483463.02G051100	Gs02	4972765	5172765	1.35519e-07	AT2G18470
GlysoPI483463.02G112800	Gs02	13343453	13543476	3.93824e-07	AT1G40390
GlysoPI483463.02G112900	Gs02	13343453	13543476	3.93824e-07	AT5G13930
GlysoPI483463.02G113000	Gs02	13343453	13543476	3.93824e-07
GlysoPI483463.02G113100	Gs02	13343453	13543476	3.93824e-07	AT3G25620
GlysoPI483463.02G113200	Gs02	13343453	13543476	3.93824e-07	AT1G68750
GlysoPI483463.02G113300	Gs02	13343453	13543476	3.93824e-07	AT1G68750
GlysoPI483463.02G113400	Gs02	13343453	13543476	3.93824e-07	AT1G68760
GlysoPI483463.02G139600	Gs02	18414822	18614841	2.23121e-10	AT3G56640
GlysoPI483463.02G140200	Gs02	19773492	20205277	3.37494e-07	AT2G05642
GlysoPI483463.02G141500	Gs02	23066422	23266422	1.3988e-07	AT3G30730
GlysoPI483463.02G141600	Gs02	23066422	23266422	1.3988e-07	AT2G05642
GlysoPI483463.02G141700	Gs02	23066422	23266422	1.3988e-07	AT3G56960
GlysoPI483463.02G142700	Gs02	26205913	26405913	4.53464e-07	AT2G28600
GlysoPI483463.02G158400	Gs02	37869217	38069217	1.08382e-07	ATCG01130
GlysoPI483463.02G186200	Gs02	43863273	44063273	6.78171e-07	AT5G58900
GlysoPI483463.02G186300	Gs02	43863273	44063273	6.78171e-07	AT3G47000
GlysoPI483463.02G186400	Gs02	43863273	44063273	6.78171e-07	AT4G40080
GlysoPI483463.02G186500	Gs02	43863273	44063273	6.78171e-07	AT5G17910
GlysoPI483463.02G186600	Gs02	43863273	44063273	6.78171e-07	AT5G58870
GlysoPI483463.02G186700	Gs02	43863273	44063273	6.78171e-07	AT4G25440
GlysoPI483463.02G186800	Gs02	43863273	44063273	6.78171e-07	AT2G29640
GlysoPI483463.02G186900	Gs02	43863273	44063273	6.78171e-07	AT1G07300
GlysoPI483463.02G187000	Gs02	43863273	44063273	6.78171e-07	AT5G11050
GlysoPI483463.02G187100	Gs02	43863273	44063273	6.78171e-07	AT1G07260
GlysoPI483463.02G187200	Gs02	43863273	44063273	6.78171e-07	AT2G29730
GlysoPI483463.02G187300	Gs02	43863273	44063273	6.78171e-07	AT3G47120
GlysoPI483463.02G187400	Gs02	43863273	44063273	6.78171e-07	AT5G58770
GlysoPI483463.02G187500	Gs02	43863273	44063273	6.78171e-07	AT5G58760
GlysoPI483463.02G187600	Gs02	43863273	44063273	6.78171e-07	AT2G38170
GlysoPI483463.02G187700	Gs02	43863273	44063273	6.78171e-07	AT5G58730
GlysoPI483463.02G187800	Gs02	43863273	44063273	6.78171e-07	AT3G08510
GlysoPI483463.02G187900	Gs02	43863273	44063273	6.78171e-07	AT1G07200
GlysoPI483463.02G188000	Gs02	43863273	44063273	6.78171e-07	AT5G58620
GlysoPI483463.02G188100	Gs02	43863273	44063273	6.78171e-07	AT5G58630
GlysoPI483463.02G188200	Gs02	43863273	44063273	6.78171e-07	AT5G05580
GlysoPI483463.02G226500	Gs02	48110879	48310893	1.40269e-06	AT1G05065
GlysoPI483463.02G226600	Gs02	48110879	48310893	1.40269e-06	AT3G21630
GlysoPI483463.02G226700	Gs02	48110879	48310893	1.40269e-06	AT3G21630
GlysoPI483463.02G226800	Gs02	48110879	48310893	1.40269e-06	AT3G21630
GlysoPI483463.02G226900	Gs02	48110879	48310893	1.40269e-06	AT3G50120
GlysoPI483463.02G227000	Gs02	48110879	48310893	1.40269e-06	AT4G15420
GlysoPI483463.02G227100	Gs02	48110879	48310893	1.40269e-06	AT3G21620
GlysoPI483463.02G227200	Gs02	48110879	48310893	1.40269e-06	AT3G44020
GlysoPI483463.02G227300	Gs02	48110879	48310893	1.40269e-06	AT5G06600
GlysoPI483463.02G227400	Gs02	48110879	48310893	1.40269e-06	AT3G49730
GlysoPI483463.02G227500	Gs02	48110879	48310893	1.40269e-06	AT5G20930
GlysoPI483463.02G227600	Gs02	48110879	48310893	1.40269e-06	AT2G34570
GlysoPI483463.02G227700	Gs02	48110879	48310893	1.40269e-06	AT2G27170
GlysoPI483463.02G227800	Gs02	48110879	48310893	1.40269e-06	AT1G16740
GlysoPI483463.02G227900	Gs02	48110879	48310893	1.40269e-06	AT5G20950
GlysoPI483463.02G228000	Gs02	48110879	48310893	1.40269e-06	AT2G27150
GlysoPI483463.02G228100	Gs02	48110879	48310893	1.40269e-06	AT3G43600
GlysoPI483463.02G228100	Gs02	48110879	48310893	1.40269e-06	AT2G27150
GlysoPI483463.02G228200	Gs02	48110879	48310893	1.40269e-06	AT2G27140
GlysoPI483463.02G228300	Gs02	48110879	48310893	1.40269e-06	AT2G27140
GlysoPI483463.02G228400	Gs02	48110879	48310893	1.40269e-06	AT5G20990
GlysoPI483463.02G228500	Gs02	48110879	48310893	1.40269e-06	AT3G03740
GlysoPI483463.04G008600	Gs04	731175	931175	1.46501e-06	AT4G34660
GlysoPI483463.04G008700	Gs04	731175	931175	1.46501e-06	AT4G39050
GlysoPI483463.04G008800	Gs04	731175	931175	1.46501e-06	AT1G75540
GlysoPI483463.04G008900	Gs04	731175	931175	1.46501e-06	AT1G75520
GlysoPI483463.04G009000	Gs04	731175	931175	1.46501e-06	AT1G20440
GlysoPI483463.04G009100	Gs04	731175	931175	1.46501e-06	AT4G39100
GlysoPI483463.04G009200	Gs04	731175	931175	1.46501e-06	AT4G34610
GlysoPI483463.04G009300	Gs04	731175	931175	1.46501e-06	AT3G43850
GlysoPI483463.04G009400	Gs04	731175	931175	1.46501e-06	AT4G39120
GlysoPI483463.04G009500	Gs04	731175	931175	1.46501e-06	AT2G21490
GlysoPI483463.04G009600	Gs04	731175	931175	1.46501e-06	AT4G39140
GlysoPI483463.04G009700	Gs04	731175	931175	1.46501e-06
GlysoPI483463.04G009800	Gs04	731175	931175	1.46501e-06	AT4G21065
GlysoPI483463.04G009900	Gs04	731175	931175	1.46501e-06	AT4G34590
GlysoPI483463.04G010000	Gs04	731175	931175	1.46501e-06	AT4G34588
GlysoPI483463.04G010100	Gs04	731175	931175	1.46501e-06	AT2G21520
GlysoPI483463.04G010200	Gs04	731175	931175	1.46501e-06	AT2G21540
GlysoPI483463.04G010300	Gs04	731175	931175	1.46501e-06	AT2G16370
GlysoPI483463.04G010400	Gs04	731175	931175	1.46501e-06	AT5G38020
GlysoPI483463.04G010500	Gs04	731175	931175	1.46501e-06	AT4G34560
GlysoPI483463.04G010600	Gs04	731175	931175	1.46501e-06	AT2G21580
GlysoPI483463.04G010700	Gs04	731175	931175	1.46501e-06	AT2G17080
GlysoPI483463.04G010800	Gs04	731175	931175	1.46501e-06	AT2G17070
GlysoPI483463.04G010900	Gs04	731175	931175	1.46501e-06	AT2G17080
GlysoPI483463.04G011000	Gs04	731175	931175	1.46501e-06	AT2G17070
GlysoPI483463.04G011100	Gs04	731175	931175	1.46501e-06	AT2G17080
GlysoPI483463.04G111100	Gs04	18630349	18977385	1.09478e-06	AT5G09860
GlysoPI483463.04G111200	Gs04	18630349	18977385	1.09478e-06	AT3G12270
GlysoPI483463.04G111300	Gs04	18630349	18977385	1.09478e-06
GlysoPI483463.04G111400	Gs04	18630349	18977385	1.09478e-06	AT3G56710
GlysoPI483463.04G111500	Gs04	18630349	18977385	1.09478e-06	AT5G15220
GlysoPI483463.04G111600	Gs04	18630349	18977385	1.09478e-06	AT5G13530
GlysoPI483463.04G121700	Gs04	32831968	33032086	1.11551e-08	AT2G03500
GlysoPI483463.04G164400	Gs04	47965508	48165508	3.75298e-07	AT2G40980
GlysoPI483463.04G164500	Gs04	47965508	48165508	3.75298e-07	AT4G38620
GlysoPI483463.04G164600	Gs04	47965508	48165508	3.75298e-07	AT2G29880
GlysoPI483463.04G164700	Gs04	47965508	48165508	3.75298e-07	AT1G72160
GlysoPI483463.04G164800	Gs04	47965508	48165508	3.75298e-07	AT1G10940
GlysoPI483463.04G164900	Gs04	47965508	48165508	3.75298e-07	AT5G03795
GlysoPI483463.04G165000	Gs04	47965508	48165508	3.75298e-07	AT2G30390
GlysoPI483463.04G165100	Gs04	47965508	48165508	3.75298e-07
GlysoPI483463.04G165200	Gs04	47965508	48165508	3.75298e-07	AT5G09840
GlysoPI483463.04G165300	Gs04	47965508	48165508	3.75298e-07	AT5G63640
GlysoPI483463.04G165400	Gs04	47965508	48165508	3.75298e-07	AT4G08180
GlysoPI483463.04G165500	Gs04	47965508	48165508	3.75298e-07	AT1G21980
GlysoPI483463.04G165600	Gs04	47965508	48165508	3.75298e-07	AT5G08650
GlysoPI483463.04G165700	Gs04	47965508	48165508	3.75298e-07	AT1G34320
GlysoPI483463.04G165800	Gs04	47965508	48165508	3.75298e-07	AT4G38730
GlysoPI483463.04G165900	Gs04	47965508	48165508	3.75298e-07	AT1G77270
GlysoPI483463.04G166000	Gs04	47965508	48165508	3.75298e-07	AT5G13340
GlysoPI483463.04G166100	Gs04	47965508	48165508	3.75298e-07	AT2G03200
GlysoPI483463.05G064300	Gs05	8163117	8363117	4.57999e-10	AT1G13440
GlysoPI483463.05G064400	Gs05	8163117	8363117	4.57999e-10	AT3G27320
GlysoPI483463.05G064500	Gs05	8163117	8363117	4.57999e-10	AT4G15415
GlysoPI483463.05G064600	Gs05	8163117	8363117	4.57999e-10	AT5G40740
GlysoPI483463.05G064700	Gs05	8163117	8363117	4.57999e-10	AT3G26000
GlysoPI483463.05G096000	Gs05	30864869	31064869	1.45835e-07	AT1G22040
GlysoPI483463.05G096100	Gs05	30864869	31064869	1.45835e-07	AT4G33430
GlysoPI483463.05G096200	Gs05	30864869	31064869	1.45835e-07	AT4G34640
GlysoPI483463.05G096300	Gs05	30864869	31064869	1.45835e-07	AT4G33430
GlysoPI483463.05G096400	Gs05	30864869	31064869	1.45835e-07	AT3G53500
GlysoPI483463.05G096500	Gs05	30864869	31064869	1.45835e-07	AT5G64550
GlysoPI483463.05G096600	Gs05	30864869	31064869	1.45835e-07
GlysoPI483463.05G096700	Gs05	30864869	31064869	1.45835e-07	AT3G09580
GlysoPI483463.05G096800	Gs05	30864869	31064869	1.45835e-07	AT3G19720
GlysoPI483463.05G096900	Gs05	30864869	31064869	1.45835e-07	AT5G64530
GlysoPI483463.05G097000	Gs05	30864869	31064869	1.45835e-07	AT2G29880
GlysoPI483463.05G097100	Gs05	30864869	31064869	1.45835e-07	AT4G15010
GlysoPI483463.05G097200	Gs05	30864869	31064869	1.45835e-07	AT4G14320
GlysoPI483463.05G097300	Gs05	30864869	31064869	1.45835e-07	AT1G03050
GlysoPI483463.05G097400	Gs05	30864869	31064869	1.45835e-07
GlysoPI483463.05G097500	Gs05	30864869	31064869	1.45835e-07	AT3G26410
GlysoPI483463.05G097600	Gs05	30864869	31064869	1.45835e-07	AT3G26420
GlysoPI483463.05G097700	Gs05	30864869	31064869	1.45835e-07	AT3G43660
GlysoPI483463.05G097800	Gs05	30864869	31064869	1.45835e-07	AT3G43660
GlysoPI483463.05G178000	Gs05	38923467	39123524	1.77535e-08	AT5G41350
GlysoPI483463.05G178100	Gs05	38923467	39123524	1.77535e-08	AT5G41370
GlysoPI483463.05G178200	Gs05	38923467	39123524	1.77535e-08	AT5G41380
GlysoPI483463.05G178300	Gs05	38923467	39123524	1.77535e-08	AT4G23470
GlysoPI483463.05G178400	Gs05	38923467	39123524	1.77535e-08	AT3G61460
GlysoPI483463.05G178500	Gs05	38923467	39123524	1.77535e-08	AT1G63850
GlysoPI483463.05G178600	Gs05	38923467	39123524	1.77535e-08	AT5G41410
GlysoPI483463.05G178700	Gs05	38923467	39123524	1.77535e-08	AT4G23490
GlysoPI483463.05G178800	Gs05	38923467	39123524	1.77535e-08	AT1G01350
GlysoPI483463.05G178900	Gs05	38923467	39123524	1.77535e-08	AT1G69230
GlysoPI483463.05G179000	Gs05	38923467	39123524	1.77535e-08	AT4G23500
GlysoPI483463.05G179100	Gs05	38923467	39123524	1.77535e-08	AT4G01370
GlysoPI483463.05G179200	Gs05	38923467	39123524	1.77535e-08	AT4G25740
GlysoPI483463.05G179300	Gs05	38923467	39123524	1.77535e-08	AT1G63910
GlysoPI483463.05G179400	Gs05	38923467	39123524	1.77535e-08	AT1G63930
GlysoPI483463.05G179500	Gs05	38923467	39123524	1.77535e-08	AT1G63940
GlysoPI483463.05G179600	Gs05	38923467	39123524	1.77535e-08	AT1G63940
GlysoPI483463.05G179700	Gs05	38923467	39123524	1.77535e-08	AT1G01490
GlysoPI483463.05G179800	Gs05	38923467	39123524	1.77535e-08	AT3G61510
GlysoPI483463.05G179900	Gs05	38923467	39123524	1.77535e-08	AT1G63980
GlysoPI483463.05G180000	Gs05	38923467	39123524	1.77535e-08	AT4G23550
GlysoPI483463.05G180100	Gs05	38923467	39123524	1.77535e-08	AT4G11270
GlysoPI483463.06G098800	Gs06	8859388	9059388	4.03798e-07	AT1G36940
GlysoPI483463.06G098900	Gs06	8859388	9059388	4.03798e-07	AT1G77800
GlysoPI483463.06G099000	Gs06	8859388	9059388	4.03798e-07	AT1G36980
GlysoPI483463.06G099100	Gs06	8859388	9059388	4.03798e-07	AT1G77780
GlysoPI483463.06G099200	Gs06	8859388	9059388	4.03798e-07	AT1G36990
GlysoPI483463.06G099300	Gs06	8859388	9059388	4.03798e-07	AT4G08500
GlysoPI483463.06G099400	Gs06	8859388	9059388	4.03798e-07	AT4G08460
GlysoPI483463.06G099500	Gs06	8859388	9059388	4.03798e-07	AT1G77760
GlysoPI483463.06G099600	Gs06	8859388	9059388	4.03798e-07	AT1G77760
GlysoPI483463.06G099700	Gs06	8859388	9059388	4.03798e-07	AT5G14320
GlysoPI483463.06G099800	Gs06	8859388	9059388	4.03798e-07	AT1G21980
GlysoPI483463.06G099900	Gs06	8859388	9059388	4.03798e-07	AT4G08180
GlysoPI483463.06G100000	Gs06	8859388	9059388	4.03798e-07	AT2G17900
GlysoPI483463.06G100100	Gs06	8859388	9059388	4.03798e-07	AT1G77720
GlysoPI483463.06G100200	Gs06	8859388	9059388	4.03798e-07	AT1G75710
GlysoPI483463.06G100300	Gs06	8859388	9059388	4.03798e-07	AT4G08210
GlysoPI483463.06G100400	Gs06	8859388	9059388	4.03798e-07	AT1G77710
GlysoPI483463.06G122900	Gs06	11298979	11498979	4.68579e-07	AT5G53660
GlysoPI483463.06G123000	Gs06	11298979	11498979	4.68579e-07	AT3G47570
GlysoPI483463.06G123100	Gs06	11298979	11498979	4.68579e-07
GlysoPI483463.06G123200	Gs06	11298979	11498979	4.68579e-07	AT3G47580
GlysoPI483463.06G123300	Gs06	11298979	11498979	4.68579e-07	AT4G27670
GlysoPI483463.06G123400	Gs06	11298979	11498979	4.68579e-07	AT5G03890
GlysoPI483463.06G123500	Gs06	11298979	11498979	4.68579e-07	AT2G46780
GlysoPI483463.06G123600	Gs06	11298979	11498979	4.68579e-07	AT1G32790
GlysoPI483463.06G123700	Gs06	11298979	11498979	4.68579e-07	AT1G32790
GlysoPI483463.06G123800	Gs06	11298979	11498979	4.68579e-07	AT3G49430
GlysoPI483463.06G123900	Gs06	11298979	11498979	4.68579e-07	AT3G03810
GlysoPI483463.06G124000	Gs06	11298979	11498979	4.68579e-07	AT5G24510
GlysoPI483463.06G124100	Gs06	11298979	11498979	4.68579e-07	AT5G54165
GlysoPI483463.06G124200	Gs06	11298979	11498979	4.68579e-07	AT1G32920
GlysoPI483463.06G124300	Gs06	11298979	11498979	4.68579e-07
GlysoPI483463.06G124400	Gs06	11298979	11498979	4.68579e-07	AT1G64720
GlysoPI483463.06G124500	Gs06	11298979	11498979	4.68579e-07	AT5G24500
GlysoPI483463.06G124600	Gs06	11298979	11498979	4.68579e-07	AT5G24490
GlysoPI483463.06G124700	Gs06	11298979	11498979	4.68579e-07	AT5G24470
GlysoPI483463.06G124800	Gs06	11298979	11498979	4.68579e-07	AT5G53730
GlysoPI483463.06G124900	Gs06	11298979	11498979	4.68579e-07	AT5G24460
GlysoPI483463.06G125000	Gs06	11298979	11498979	4.68579e-07	AT5G24520
GlysoPI483463.06G125100	Gs06	11298979	11498979	4.68579e-07	AT5G24530
GlysoPI483463.06G125200	Gs06	11298979	11498979	4.68579e-07	AT5G54160
GlysoPI483463.06G125300	Gs06	11298979	11498979	4.68579e-07	AT5G54160
GlysoPI483463.06G125400	Gs06	11298979	11498979	4.68579e-07	AT5G54160
GlysoPI483463.06G125500	Gs06	11298979	11498979	4.68579e-07	AT4G27660
GlysoPI483463.06G125600	Gs06	11298979	11498979	4.68579e-07	AT3G49470
GlysoPI483463.06G240400	Gs06	46734568	46934568	3.9832e-07	AT4G38840
GlysoPI483463.06G240500	Gs06	46734568	46934568	3.9832e-07	AT4G38840
GlysoPI483463.06G240600	Gs06	46734568	46934568	3.9832e-07	AT4G38840
GlysoPI483463.06G240700	Gs06	46734568	46934568	3.9832e-07	AT4G38840
GlysoPI483463.06G240800	Gs06	46734568	46934568	3.9832e-07	AT4G38840
GlysoPI483463.06G240900	Gs06	46734568	46934568	3.9832e-07	AT4G38840
GlysoPI483463.06G241000	Gs06	46734568	46934568	3.9832e-07	AT4G38840
GlysoPI483463.06G241100	Gs06	46734568	46934568	3.9832e-07	AT5G45890
GlysoPI483463.06G241200	Gs06	46734568	46934568	3.9832e-07	AT5G45890
GlysoPI483463.06G241300	Gs06	46734568	46934568	3.9832e-07	AT3G58610
GlysoPI483463.06G241400	Gs06	46734568	46934568	3.9832e-07	AT1G68810
GlysoPI483463.06G241500	Gs06	46734568	46934568	3.9832e-07	AT1G69523
GlysoPI483463.06G241600	Gs06	46734568	46934568	3.9832e-07	AT1G69523
GlysoPI483463.06G241700	Gs06	46734568	46934568	3.9832e-07	AT2G31130
GlysoPI483463.06G241800	Gs06	46734568	46934568	3.9832e-07	AT2G42570
GlysoPI483463.06G241900	Gs06	46734568	46934568	3.9832e-07	AT2G42560
GlysoPI483463.06G242000	Gs06	46734568	46934568	3.9832e-07	AT1G06230
GlysoPI483463.06G242100	Gs06	46734568	46934568	3.9832e-07	AT2G31085
GlysoPI483463.06G242200	Gs06	46734568	46934568	3.9832e-07	AT3G58590
GlysoPI483463.06G242300	Gs06	46734568	46934568	3.9832e-07	AT2G38080
GlysoPI483463.06G242400	Gs06	46734568	46934568	3.9832e-07
GlysoPI483463.08G166100	Gs08	14772957	14972957	8.06698e-07	AT2G13810
GlysoPI483463.08G166200	Gs08	14772957	14972957	8.06698e-07	AT1G80670
GlysoPI483463.08G166300	Gs08	14772957	14972957	8.06698e-07	AT4G33430
GlysoPI483463.08G166400	Gs08	14772957	14972957	8.06698e-07	AT5G64570
GlysoPI483463.08G166500	Gs08	14772957	14972957	8.06698e-07	AT2G22590
GlysoPI483463.08G166600	Gs08	14772957	14972957	8.06698e-07	AT5G64530
GlysoPI483463.08G166700	Gs08	14772957	14972957	8.06698e-07	AT5G57190
GlysoPI483463.08G166800	Gs08	14772957	14972957	8.06698e-07	AT4G14320
GlysoPI483463.08G166900	Gs08	14772957	14972957	8.06698e-07	AT1G03050
GlysoPI483463.08G167000	Gs08	14772957	14972957	8.06698e-07	AT4G25980
GlysoPI483463.08G167100	Gs08	14772957	14972957	8.06698e-07
GlysoPI483463.08G167200	Gs08	14772957	14972957	8.06698e-07	AT1G43710
GlysoPI483463.08G167300	Gs08	14772957	14972957	8.06698e-07
GlysoPI483463.08G167400	Gs08	14772957	14972957	8.06698e-07	AT1G15120
GlysoPI483463.08G167500	Gs08	14772957	14972957	8.06698e-07	AT3G43660
GlysoPI483463.08G167600	Gs08	14772957	14972957	8.06698e-07	AT5G09900
GlysoPI483463.08G167700	Gs08	14772957	14972957	8.06698e-07	AT3G26330
GlysoPI483463.08G167800	Gs08	14772957	14972957	8.06698e-07	AT3G12110
GlysoPI483463.08G167900	Gs08	14772957	14972957	8.06698e-07	AT1G43670
GlysoPI483463.08G168000	Gs08	14772957	14972957	8.06698e-07
GlysoPI483463.08G168100	Gs08	14772957	14972957	8.06698e-07	AT1G25270
GlysoPI483463.08G168200	Gs08	14772957	14972957	8.06698e-07	AT1G68170
GlysoPI483463.08G199200	Gs08	17994333	18194333	2.64755e-09	AT1G80810
GlysoPI483463.08G199200	Gs08	17994333	18194333	2.64755e-09	AT4G31880
GlysoPI483463.08G199300	Gs08	17994333	18194333	2.64755e-09	AT1G15950
GlysoPI483463.08G199400	Gs08	17994333	18194333	2.64755e-09	AT1G15960
GlysoPI483463.08G199500	Gs08	17994333	18194333	2.64755e-09	AT5G10930
GlysoPI483463.08G199600	Gs08	17994333	18194333	2.64755e-09	AT3G58730
GlysoPI483463.08G199700	Gs08	17994333	18194333	2.64755e-09	AT1G80840
GlysoPI483463.08G199800	Gs08	17994333	18194333	2.64755e-09	AT5G57970
GlysoPI483463.08G199900	Gs08	17994333	18194333	2.64755e-09	AT1G15980
GlysoPI483463.08G200000	Gs08	17994333	18194333	2.64755e-09	AT1G80860
GlysoPI483463.08G200100	Gs08	17994333	18194333	2.64755e-09	AT4G37580
GlysoPI483463.08G200200	Gs08	17994333	18194333	2.64755e-09	AT1G16880
GlysoPI483463.08G200300	Gs08	17994333	18194333	2.64755e-09	AT1G73060
GlysoPI483463.08G200400	Gs08	17994333	18194333	2.64755e-09	AT1G19780
GlysoPI483463.08G200500	Gs08	17994333	18194333	2.64755e-09	AT2G03220
GlysoPI483463.08G200600	Gs08	17994333	18194333	2.64755e-09	AT2G03220
GlysoPI483463.08G200700	Gs08	17994333	18194333	2.64755e-09	AT2G35736
GlysoPI483463.08G200800	Gs08	17994333	18194333	2.64755e-09	AT2G35736
GlysoPI483463.08G200900	Gs08	17994333	18194333	2.64755e-09	AT1G16000
GlysoPI483463.08G201000	Gs08	17994333	18194333	2.64755e-09	AT1G80920
GlysoPI483463.08G201100	Gs08	17994333	18194333	2.64755e-09	AT4G31860
GlysoPI483463.08G244000	Gs08	36732153	36976272	1.87082e-08	AT5G10530
GlysoPI483463.08G244100	Gs08	36732153	36976272	1.87082e-08	AT5G65600
GlysoPI483463.08G244200	Gs08	36732153	36976272	1.87082e-08	AT2G18950
GlysoPI483463.08G244300	Gs08	36732153	36976272	1.87082e-08	AT5G65600
GlysoPI483463.08G244400	Gs08	36732153	36976272	1.87082e-08	AT5G10530
GlysoPI483463.08G244500	Gs08	36732153	36976272	1.87082e-08
GlysoPI483463.08G244600	Gs08	36732153	36976272	1.87082e-08	AT5G10530
GlysoPI483463.08G248600	Gs08	39122495	39322495	3.93605e-07	AT1G24590
GlysoPI483463.08G248700	Gs08	39122495	39322495	3.93605e-07	AT3G26510
GlysoPI483463.08G248800	Gs08	39122495	39322495	3.93605e-07	AT3G26570
GlysoPI483463.08G248900	Gs08	39122495	39322495	3.93605e-07	AT1G70630
GlysoPI483463.08G249000	Gs08	39122495	39322495	3.93605e-07	AT2G34440
GlysoPI483463.08G249100	Gs08	39122495	39322495	3.93605e-07	AT3G26590
GlysoPI483463.08G249200	Gs08	39122495	39322495	3.93605e-07	AT2G42490
GlysoPI483463.08G296400	Gs08	45761044	45961044	1.82559e-08	AT1G55730
GlysoPI483463.08G296500	Gs08	45761044	45961044	1.82559e-08	AT3G13310
GlysoPI483463.08G296600	Gs08	45761044	45961044	1.82559e-08	AT3G13300
GlysoPI483463.08G296700	Gs08	45761044	45961044	1.82559e-08	AT3G13300
GlysoPI483463.08G296800	Gs08	45761044	45961044	1.82559e-08	AT3G13300
GlysoPI483463.08G296900	Gs08	45761044	45961044	1.82559e-08	AT3G13235
GlysoPI483463.08G297000	Gs08	45761044	45961044	1.82559e-08	AT5G43822
GlysoPI483463.08G297100	Gs08	45761044	45961044	1.82559e-08
GlysoPI483463.08G297200	Gs08	45761044	45961044	1.82559e-08	AT3G13230
GlysoPI483463.08G297300	Gs08	45761044	45961044	1.82559e-08	AT1G55760
GlysoPI483463.08G297400	Gs08	45761044	45961044	1.82559e-08	AT4G01070
GlysoPI483463.08G297500	Gs08	45761044	45961044	1.82559e-08	AT4G01070
GlysoPI483463.08G297600	Gs08	45761044	45961044	1.82559e-08	AT4G01070
GlysoPI483463.08G297700	Gs08	45761044	45961044	1.82559e-08
GlysoPI483463.08G297800	Gs08	45761044	45961044	1.82559e-08	AT4G01070
GlysoPI483463.08G297900	Gs08	45761044	45961044	1.82559e-08	AT4G01070
GlysoPI483463.08G298000	Gs08	45761044	45961044	1.82559e-08	AT4G01070
GlysoPI483463.08G298100	Gs08	45761044	45961044	1.82559e-08	AT4G01070
GlysoPI483463.08G298200	Gs08	45761044	45961044	1.82559e-08	AT3G60450
GlysoPI483463.08G298300	Gs08	45761044	45961044	1.82559e-08	AT3G18990
GlysoPI483463.08G298400	Gs08	45761044	45961044	1.82559e-08	AT3G18990
GlysoPI483463.08G298500	Gs08	45761044	45961044	1.82559e-08
GlysoPI483463.08G298600	Gs08	45761044	45961044	1.82559e-08
GlysoPI483463.08G298700	Gs08	45761044	45961044	1.82559e-08
GlysoPI483463.08G298800	Gs08	45761044	45961044	1.82559e-08	AT5G40240
GlysoPI483463.08G298800	Gs08	45761044	45961044	1.82559e-08	AT3G28100
GlysoPI483463.09G051300	Gs09	5218837	5418837	9.34794e-11	AT4G30180
GlysoPI483463.09G051400	Gs09	5218837	5418837	9.34794e-11	AT4G25910
GlysoPI483463.09G051500	Gs09	5218837	5418837	9.34794e-11	AT5G57340
GlysoPI483463.09G051600	Gs09	5218837	5418837	9.34794e-11	AT2G18980
GlysoPI483463.09G051700	Gs09	5218837	5418837	9.34794e-11	AT1G62520
GlysoPI483463.09G051800	Gs09	5218837	5418837	9.34794e-11	AT5G57330
GlysoPI483463.09G051900	Gs09	5218837	5418837	9.34794e-11	AT4G30160
GlysoPI483463.09G052000	Gs09	5218837	5418837	9.34794e-11	AT1G71840
GlysoPI483463.09G052100	Gs09	5218837	5418837	9.34794e-11	AT1G17690
GlysoPI483463.09G052200	Gs09	5218837	5418837	9.34794e-11	AT3G20250
GlysoPI483463.09G052300	Gs09	5218837	5418837	9.34794e-11	AT2G19080
GlysoPI483463.09G052400	Gs09	5218837	5418837	9.34794e-11	AT2G19090
GlysoPI483463.09G052500	Gs09	5218837	5418837	9.34794e-11	ATCG01230
GlysoPI483463.09G081700	Gs09	17484048	17684048	6.52001e-09	AT4G27290
GlysoPI483463.09G081800	Gs09	17484048	17684048	6.52001e-09	AT4G27290
GlysoPI483463.09G081900	Gs09	17484048	17684048	6.52001e-09
GlysoPI483463.09G082000	Gs09	17484048	17684048	6.52001e-09	AT1G53490
GlysoPI483463.09G227700	Gs09	47056975	47256975	9.38889e-07	AT1G62640
GlysoPI483463.09G227800	Gs09	47056975	47256975	9.38889e-07	AT4G25850
GlysoPI483463.09G227900	Gs09	47056975	47256975	9.38889e-07	AT3G51650
GlysoPI483463.09G228000	Gs09	47056975	47256975	9.38889e-07	AT3G51650
GlysoPI483463.09G228100	Gs09	47056975	47256975	9.38889e-07	AT5G05340
GlysoPI483463.09G228200	Gs09	47056975	47256975	9.38889e-07	AT5G05340
GlysoPI483463.09G228300	Gs09	47056975	47256975	9.38889e-07	AT2G38540
GlysoPI483463.09G228400	Gs09	47056975	47256975	9.38889e-07	AT2G40435
GlysoPI483463.09G228500	Gs09	47056975	47256975	9.38889e-07	AT3G51710
GlysoPI483463.09G228600	Gs09	47056975	47256975	9.38889e-07	AT4G14368
GlysoPI483463.09G228700	Gs09	47056975	47256975	9.38889e-07	AT3G08850
GlysoPI483463.09G228800	Gs09	47056975	47256975	9.38889e-07	AT5G01760
GlysoPI483463.09G228900	Gs09	47056975	47256975	9.38889e-07	AT3G08850
GlysoPI483463.09G229000	Gs09	47056975	47256975	9.38889e-07	AT5G01750
GlysoPI483463.09G229100	Gs09	47056975	47256975	9.38889e-07	AT4G35800
GlysoPI483463.09G229200	Gs09	47056975	47256975	9.38889e-07	AT5G01750
GlysoPI483463.09G229300	Gs09	47056975	47256975	9.38889e-07	AT4G13310
GlysoPI483463.09G229400	Gs09	47056975	47256975	9.38889e-07	AT2G38420
GlysoPI483463.10G061300	Gs10	6787292	6987292	1.82032e-08	AT4G25490
GlysoPI483463.10G061400	Gs10	6787292	6987292	1.82032e-08	AT5G03670
GlysoPI483463.10G061500	Gs10	6787292	6987292	1.82032e-08	AT2G36400
GlysoPI483463.10G061600	Gs10	6787292	6987292	1.82032e-08	AT2G36350
GlysoPI483463.10G061700	Gs10	6787292	6987292	1.82032e-08	AT3G52880
GlysoPI483463.10G061800	Gs10	6787292	6987292	1.82032e-08	AT3G44590
GlysoPI483463.10G061900	Gs10	6787292	6987292	1.82032e-08	AT3G52870
GlysoPI483463.10G062000	Gs10	6787292	6987292	1.82032e-08	AT5G03620
GlysoPI483463.10G062100	Gs10	6787292	6987292	1.82032e-08	AT1G19485
GlysoPI483463.10G062200	Gs10	6787292	6987292	1.82032e-08	AT5G60800
GlysoPI483463.10G063200	Gs10	7082290	7282290	6.84167e-09	AT5G45980
GlysoPI483463.10G063300	Gs10	7082290	7282290	6.84167e-09	AT3G11710
GlysoPI483463.10G063400	Gs10	7082290	7282290	6.84167e-09	AT2G18950
GlysoPI483463.10G063500	Gs10	7082290	7282290	6.84167e-09	AT2G18950
GlysoPI483463.10G063600	Gs10	7082290	7282290	6.84167e-09	AT2G18950
GlysoPI483463.10G068100	Gs10	8038833	8238833	8.98981e-08	AT2G36080
GlysoPI483463.10G068200	Gs10	8038833	8238833	8.98981e-08	AT5G04800
GlysoPI483463.10G068300	Gs10	8038833	8238833	8.98981e-08	AT5G45910
GlysoPI483463.10G068400	Gs10	8038833	8238833	8.98981e-08	AT5G45910
GlysoPI483463.10G068500	Gs10	8038833	8238833	8.98981e-08	AT3G11600
GlysoPI483463.10G068600	Gs10	8038833	8238833	8.98981e-08	AT2G37340
GlysoPI483463.10G078300	Gs10	11957144	12157144	9.74409e-08	AT3G60830
GlysoPI483463.10G078400	Gs10	11957144	12157144	9.74409e-08	AT1G51400
GlysoPI483463.10G078500	Gs10	11957144	12157144	9.74409e-08
GlysoPI483463.10G078600	Gs10	11957144	12157144	9.74409e-08	AT3G21055
GlysoPI483463.10G078700	Gs10	11957144	12157144	9.74409e-08	AT5G47970
GlysoPI483463.10G078800	Gs10	11957144	12157144	9.74409e-08	AT3G08010
GlysoPI483463.10G078900	Gs10	11957144	12157144	9.74409e-08	AT1G55530
GlysoPI483463.10G079000	Gs10	11957144	12157144	9.74409e-08	AT3G52080
GlysoPI483463.10G079100	Gs10	11957144	12157144	9.74409e-08	AT3G23890
GlysoPI483463.10G079200	Gs10	11957144	12157144	9.74409e-08	AT3G08030
GlysoPI483463.10G113100	Gs10	38312469	38512469	2.46288e-08	AT3G62010
GlysoPI483463.10G113200	Gs10	38312469	38512469	2.46288e-08	AT5G15610
GlysoPI483463.10G113300	Gs10	38312469	38512469	2.46288e-08	AT5G03560
GlysoPI483463.10G113400	Gs10	38312469	38512469	2.46288e-08	AT5G26742
GlysoPI483463.10G113500	Gs10	38312469	38512469	2.46288e-08	AT3G05940
GlysoPI483463.10G113600	Gs10	38312469	38512469	2.46288e-08	AT5G26731
GlysoPI483463.10G113700	Gs10	38312469	38512469	2.46288e-08
GlysoPI483463.10G113800	Gs10	38312469	38512469	2.46288e-08	AT1G09570
GlysoPI483463.10G113900	Gs10	38312469	38512469	2.46288e-08	AT5G26710
GlysoPI483463.10G114000	Gs10	38312469	38512469	2.46288e-08	AT3G62020
GlysoPI483463.10G114100	Gs10	38312469	38512469	2.46288e-08	AT5G26680
GlysoPI483463.10G114200	Gs10	38312469	38512469	2.46288e-08	AT1G59740
GlysoPI483463.10G114300	Gs10	38312469	38512469	2.46288e-08	AT3G05910
GlysoPI483463.10G242300	Gs10	51529508	51729509	1.84268e-08	AT3G19910
GlysoPI483463.10G242400	Gs10	51529508	51729509	1.84268e-08	AT1G50320
GlysoPI483463.10G242500	Gs10	51529508	51729509	1.84268e-08	AT3G19940
GlysoPI483463.10G242600	Gs10	51529508	51729509	1.84268e-08	AT3G59040
GlysoPI483463.10G242700	Gs10	51529508	51729509	1.84268e-08	AT3G19950
GlysoPI483463.10G242800	Gs10	51529508	51729509	1.84268e-08
GlysoPI483463.10G242900	Gs10	51529508	51729509	1.84268e-08
GlysoPI483463.10G243000	Gs10	51529508	51729509	1.84268e-08	AT5G08320
GlysoPI483463.10G243100	Gs10	51529508	51729509	1.84268e-08	AT5G23280
GlysoPI483463.10G243200	Gs10	51529508	51729509	1.84268e-08	AT5G23290
GlysoPI483463.10G243300	Gs10	51529508	51729509	1.84268e-08	AT2G29690
GlysoPI483463.10G243400	Gs10	51529508	51729509	1.84268e-08	AT5G23300
GlysoPI483463.10G243500	Gs10	51529508	51729509	1.84268e-08	AT3G19960
GlysoPI483463.10G243600	Gs10	51529508	51729509	1.84268e-08	AT5G08340
GlysoPI483463.10G243700	Gs10	51529508	51729509	1.84268e-08	AT3G19970
GlysoPI483463.10G243800	Gs10	51529508	51729509	1.84268e-08	AT5G23340
GlysoPI483463.10G243900	Gs10	51529508	51729509	1.84268e-08	AT5G23340
GlysoPI483463.10G244000	Gs10	51529508	51729509	1.84268e-08	AT5G64920
GlysoPI483463.10G244100	Gs10	51529508	51729509	1.84268e-08	AT5G08350
GlysoPI483463.10G244200	Gs10	51529508	51729509	1.84268e-08	AT5G08350
GlysoPI483463.10G244300	Gs10	51529508	51729509	1.84268e-08	AT5G08350
GlysoPI483463.10G244400	Gs10	51529508	51729509	1.84268e-08	AT5G08580
GlysoPI483463.10G244500	Gs10	51529508	51729509	1.84268e-08	AT5G46610
GlysoPI483463.10G244600	Gs10	51529508	51729509	1.84268e-08	AT4G17970
GlysoPI483463.10G244700	Gs10	51529508	51729509	1.84268e-08	AT5G46610
GlysoPI483463.10G244800	Gs10	51529508	51729509	1.84268e-08	AT2G27285
GlysoPI483463.10G244900	Gs10	51529508	51729509	1.84268e-08	AT3G20015
GlysoPI483463.10G245000	Gs10	51529508	51729509	1.84268e-08	AT1G50410
GlysoPI483463.11G079800	Gs11	6645854	6845854	6.78411e-08	AT3G51480
GlysoPI483463.11G079900	Gs11	6645854	6845854	6.78411e-08	AT2G17520
GlysoPI483463.11G080000	Gs11	6645854	6845854	6.78411e-08	AT5G65980
GlysoPI483463.11G080100	Gs11	6645854	6845854	6.78411e-08	AT1G42960
GlysoPI483463.11G080200	Gs11	6645854	6845854	6.78411e-08	AT2G17480
GlysoPI483463.11G080300	Gs11	6645854	6845854	6.78411e-08	AT1G76410
GlysoPI483463.11G080400	Gs11	6645854	6845854	6.78411e-08	AT3G51490
GlysoPI483463.11G080500	Gs11	6645854	6845854	6.78411e-08	AT2G17270
GlysoPI483463.11G080600	Gs11	6645854	6845854	6.78411e-08	AT4G35470
GlysoPI483463.11G080700	Gs11	6645854	6845854	6.78411e-08	AT1G76490
GlysoPI483463.11G080800	Gs11	6645854	6845854	6.78411e-08
GlysoPI483463.11G080900	Gs11	6645854	6845854	6.78411e-08	AT2G17420
GlysoPI483463.11G081000	Gs11	6645854	6845854	6.78411e-08
GlysoPI483463.11G081100	Gs11	6645854	6845854	6.78411e-08	AT2G17410
GlysoPI483463.11G081200	Gs11	6645854	6845854	6.78411e-08	AT1G76520
GlysoPI483463.11G081300	Gs11	6645854	6845854	6.78411e-08	AT4G38180
GlysoPI483463.11G081400	Gs11	6645854	6845854	6.78411e-08	AT3G51520
GlysoPI483463.11G081500	Gs11	6645854	6845854	6.78411e-08	AT2G04160
GlysoPI483463.11G081600	Gs11	6645854	6845854	6.78411e-08	AT3G51500
GlysoPI483463.11G169600	Gs11	19610986	19810986	6.91392e-07	AT5G13530
GlysoPI483463.11G169700	Gs11	19610986	19810986	6.91392e-07	AT3G12270
GlysoPI483463.11G182400	Gs11	28057337	28257337	3.94738e-08	AT3G53730
GlysoPI483463.11G219800	Gs11	37921799	38121799	1.23416e-07	AT4G39910
GlysoPI483463.11G219900	Gs11	37921799	38121799	1.23416e-07	AT1G34370
GlysoPI483463.11G220000	Gs11	37921799	38121799	1.23416e-07	AT5G10290
GlysoPI483463.11G220100	Gs11	37921799	38121799	1.23416e-07	AT2G22360
GlysoPI483463.11G220200	Gs11	37921799	38121799	1.23416e-07	AT5G10310
GlysoPI483463.11G220300	Gs11	37921799	38121799	1.23416e-07	AT5G10320
GlysoPI483463.11G220400	Gs11	37921799	38121799	1.23416e-07	AT2G22400
GlysoPI483463.11G220500	Gs11	37921799	38121799	1.23416e-07	AT5G65280
GlysoPI483463.11G220600	Gs11	37921799	38121799	1.23416e-07	AT4G40020
GlysoPI483463.11G220700	Gs11	37921799	38121799	1.23416e-07	AT4G40030
GlysoPI483463.11G220800	Gs11	37921799	38121799	1.23416e-07	AT4G40030
GlysoPI483463.11G220900	Gs11	37921799	38121799	1.23416e-07	AT5G65290
GlysoPI483463.11G221000	Gs11	37921799	38121799	1.23416e-07	AT3G06868
GlysoPI483463.11G221100	Gs11	37921799	38121799	1.23416e-07	AT3G18860
GlysoPI483463.11G221200	Gs11	37921799	38121799	1.23416e-07	AT2G22430
GlysoPI483463.12G121000	Gs12	20465205	20665252	3.03583e-09	AT1G49430
GlysoPI483463.12G121100	Gs12	20465205	20665252	3.03583e-09	AT3G20630
GlysoPI483463.12G125200	Gs12	23470101	23670173	1.25643e-08	AT2G24220
GlysoPI483463.12G125300	Gs12	23470101	23670173	1.25643e-08	AT4G30935
GlysoPI483463.12G181100	Gs12	39214273	39414273	2.46885e-07	AT5G25610
GlysoPI483463.12G181200	Gs12	39214273	39414273	2.46885e-07	AT5G25610
GlysoPI483463.12G181300	Gs12	39214273	39414273	2.46885e-07	AT4G27280
GlysoPI483463.12G181400	Gs12	39214273	39414273	2.46885e-07	AT4G27280
GlysoPI483463.12G181500	Gs12	39214273	39414273	2.46885e-07	AT4G27340
GlysoPI483463.12G181600	Gs12	39214273	39414273	2.46885e-07	AT4G03270
GlysoPI483463.12G181700	Gs12	39214273	39414273	2.46885e-07	AT2G17510
GlysoPI483463.12G181800	Gs12	39214273	39414273	2.46885e-07	AT4G21440
GlysoPI483463.12G181900	Gs12	39214273	39414273	2.46885e-07	AT4G10265
GlysoPI483463.12G182000	Gs12	39214273	39414273	2.46885e-07	AT4G10265
GlysoPI483463.12G182100	Gs12	39214273	39414273	2.46885e-07	AT4G10780
GlysoPI483463.12G182200	Gs12	39214273	39414273	2.46885e-07
GlysoPI483463.12G182300	Gs12	39214273	39414273	2.46885e-07	AT4G21450
GlysoPI483463.12G182400	Gs12	39214273	39414273	2.46885e-07	AT5G54240
GlysoPI483463.12G182500	Gs12	39214273	39414273	2.46885e-07	AT4G27360
GlysoPI483463.12G182600	Gs12	39214273	39414273	2.46885e-07
GlysoPI483463.12G182700	Gs12	39214273	39414273	2.46885e-07	AT5G54250
GlysoPI483463.12G182800	Gs12	39214273	39414273	2.46885e-07	AT5G54260
GlysoPI483463.12G185800	Gs12	39784998	39985013	7.47658e-09	AT1G61820
GlysoPI483463.12G185800	Gs12	39784998	39985013	7.47658e-09	AT1G61810
GlysoPI483463.12G185900	Gs12	39784998	39985013	7.47658e-09	AT1G61820
GlysoPI483463.12G186000	Gs12	39784998	39985013	7.47658e-09	AT1G52980
GlysoPI483463.12G186100	Gs12	39784998	39985013	7.47658e-09	AT5G53760
GlysoPI483463.12G186200	Gs12	39784998	39985013	7.47658e-09	AT3G15390
GlysoPI483463.12G186300	Gs12	39784998	39985013	7.47658e-09	AT3G15380
GlysoPI483463.12G186400	Gs12	39784998	39985013	7.47658e-09	AT5G53800
GlysoPI483463.12G186500	Gs12	39784998	39985013	7.47658e-09	AT3G15360
GlysoPI483463.12G186600	Gs12	39784998	39985013	7.47658e-09	AT1G23220
GlysoPI483463.12G186700	Gs12	39784998	39985013	7.47658e-09	AT1G53010
GlysoPI483463.12G186800	Gs12	39784998	39985013	7.47658e-09	AT1G53010
GlysoPI483463.12G186900	Gs12	39784998	39985013	7.47658e-09	AT4G21700
GlysoPI483463.12G187000	Gs12	39784998	39985013	7.47658e-09
GlysoPI483463.12G187100	Gs12	39784998	39985013	7.47658e-09	AT1G03080
GlysoPI483463.12G187200	Gs12	39784998	39985013	7.47658e-09	AT3G15355
GlysoPI483463.12G187300	Gs12	39784998	39985013	7.47658e-09	AT1G53035
GlysoPI483463.12G187400	Gs12	39784998	39985013	7.47658e-09	AT1G53040
GlysoPI483463.12G187500	Gs12	39784998	39985013	7.47658e-09	AT1G53050
GlysoPI483463.12G187600	Gs12	39784998	39985013	7.47658e-09	AT3G15354
GlysoPI483463.12G187700	Gs12	39784998	39985013	7.47658e-09	AT3G15350
GlysoPI483463.12G187800	Gs12	39784998	39985013	7.47658e-09	AT4G27500
GlysoPI483463.12G187900	Gs12	39784998	39985013	7.47658e-09	AT1G53120
GlysoPI483463.13G004600	Gs13	1751581	1951613	4.04383e-11	AT4G25330
GlysoPI483463.13G004700	Gs13	1751581	1951613	4.04383e-11	AT3G51690
GlysoPI483463.13G004800	Gs13	1751581	1951613	4.04383e-11	AT1G02960
GlysoPI483463.13G004900	Gs13	1751581	1951613	4.04383e-11	AT4G12680
GlysoPI483463.13G009000	Gs13	4421991	4622057	1.33249e-07	AT2G04570
GlysoPI483463.13G011000	Gs13	7922165	8122165	1.27856e-06	AT2G02970
GlysoPI483463.13G040400	Gs13	15709694	15909694	3.20434e-07	AT3G01220
GlysoPI483463.13G040400	Gs13	15709694	15909694	3.20434e-07	AT5G15150
GlysoPI483463.13G040500	Gs13	15709694	15909694	3.20434e-07	AT3G28760
GlysoPI483463.13G040600	Gs13	15709694	15909694	3.20434e-07	AT3G47800
GlysoPI483463.13G040700	Gs13	15709694	15909694	3.20434e-07	AT5G39890
GlysoPI483463.13G040800	Gs13	15709694	15909694	3.20434e-07	AT5G25150
GlysoPI483463.13G040900	Gs13	15709694	15909694	3.20434e-07	AT3G28720
GlysoPI483463.13G041000	Gs13	15709694	15909694	3.20434e-07	AT1G14420
GlysoPI483463.13G041100	Gs13	15709694	15909694	3.20434e-07	AT3G28730
GlysoPI483463.13G041200	Gs13	15709694	15909694	3.20434e-07	AT3G01280
GlysoPI483463.13G041300	Gs13	15709694	15909694	3.20434e-07	AT5G62740
GlysoPI483463.13G041400	Gs13	15709694	15909694	3.20434e-07
GlysoPI483463.13G041500	Gs13	15709694	15909694	3.20434e-07
GlysoPI483463.13G041600	Gs13	15709694	15909694	3.20434e-07	AT5G62670
GlysoPI483463.13G041700	Gs13	15709694	15909694	3.20434e-07	AT5G15070
GlysoPI483463.13G077700	Gs13	21655596	21855596	1.18729e-07	AT1G17455
GlysoPI483463.13G077800	Gs13	21655596	21855596	1.18729e-07
GlysoPI483463.13G077900	Gs13	21655596	21855596	1.18729e-07	AT2G31670
GlysoPI483463.13G078000	Gs13	21655596	21855596	1.18729e-07	AT2G47460
GlysoPI483463.13G078100	Gs13	21655596	21855596	1.18729e-07	AT5G09380
GlysoPI483463.13G078200	Gs13	21655596	21855596	1.18729e-07	AT2G28230
GlysoPI483463.13G078300	Gs13	21655596	21855596	1.18729e-07	AT3G13960
GlysoPI483463.13G078400	Gs13	21655596	21855596	1.18729e-07	AT5G35560
GlysoPI483463.13G078500	Gs13	21655596	21855596	1.18729e-07	AT2G06050
GlysoPI483463.13G078600	Gs13	21655596	21855596	1.18729e-07	AT2G06050
GlysoPI483463.13G078700	Gs13	21655596	21855596	1.18729e-07	AT5G35570
GlysoPI483463.13G078800	Gs13	21655596	21855596	1.18729e-07	AT2G06040
GlysoPI483463.13G078900	Gs13	21655596	21855596	1.18729e-07	AT2G06025
GlysoPI483463.13G079000	Gs13	21655596	21855596	1.18729e-07	AT3G42725
GlysoPI483463.13G079100	Gs13	21655596	21855596	1.18729e-07	AT2G06010
GlysoPI483463.13G079200	Gs13	21655596	21855596	1.18729e-07	AT1G49290
GlysoPI483463.13G079300	Gs13	21655596	21855596	1.18729e-07	AT5G21940
GlysoPI483463.13G079400	Gs13	21655596	21855596	1.18729e-07	AT3G45310
GlysoPI483463.13G079500	Gs13	21655596	21855596	1.18729e-07	AT2G05940
GlysoPI483463.13G079600	Gs13	21655596	21855596	1.18729e-07	AT2G05920
GlysoPI483463.13G079700	Gs13	21655596	21855596	1.18729e-07	AT5G20635
GlysoPI483463.13G079800	Gs13	21655596	21855596	1.18729e-07	AT2G05910
GlysoPI483463.13G098500	Gs13	23808271	24008271	1.44283e-10	AT2G37570
GlysoPI483463.13G098600	Gs13	23808271	24008271	1.44283e-10	AT2G37570
GlysoPI483463.13G098700	Gs13	23808271	24008271	1.44283e-10	AT5G02500
GlysoPI483463.13G098800	Gs13	23808271	24008271	1.44283e-10	AT5G02520
GlysoPI483463.13G098900	Gs13	23808271	24008271	1.44283e-10	AT3G53720
GlysoPI483463.13G099000	Gs13	23808271	24008271	1.44283e-10	AT2G37550
GlysoPI483463.13G099100	Gs13	23808271	24008271	1.44283e-10	AT5G02540
GlysoPI483463.13G099200	Gs13	23808271	24008271	1.44283e-10	AT2G37530
GlysoPI483463.13G099300	Gs13	23808271	24008271	1.44283e-10	AT3G53700
GlysoPI483463.13G099400	Gs13	23808271	24008271	1.44283e-10	AT5G59890
GlysoPI483463.13G099500	Gs13	23808271	24008271	1.44283e-10	AT2G37520
GlysoPI483463.13G099600	Gs13	23808271	24008271	1.44283e-10	AT2G37500
GlysoPI483463.13G099700	Gs13	23808271	24008271	1.44283e-10	AT3G53670
GlysoPI483463.13G099800	Gs13	23808271	24008271	1.44283e-10	AT2G37470
GlysoPI483463.13G099900	Gs13	23808271	24008271	1.44283e-10	AT3G62450
GlysoPI483463.13G100000	Gs13	23808271	24008271	1.44283e-10	AT3G53620
GlysoPI483463.13G100100	Gs13	23808271	24008271	1.44283e-10	AT2G37460
GlysoPI483463.13G100200	Gs13	23808271	24008271	1.44283e-10	AT5G59830
GlysoPI483463.13G100300	Gs13	23808271	24008271	1.44283e-10	AT2G37440
GlysoPI483463.13G100400	Gs13	23808271	24008271	1.44283e-10	AT2G37430
GlysoPI483463.13G100500	Gs13	23808271	24008271	1.44283e-10	AT2G37430
GlysoPI483463.13G100600	Gs13	23808271	24008271	1.44283e-10	AT3G53600
GlysoPI483463.13G100700	Gs13	23808271	24008271	1.44283e-10	AT2G37420
GlysoPI483463.13G118900	Gs13	26226016	26426016	3.1059e-07	AT3G52870
GlysoPI483463.13G119000	Gs13	26226016	26426016	3.1059e-07	AT2G27690
GlysoPI483463.13G119100	Gs13	26226016	26426016	3.1059e-07	AT1G28520
GlysoPI483463.13G119200	Gs13	26226016	26426016	3.1059e-07	AT5G46030
GlysoPI483463.13G119300	Gs13	26226016	26426016	3.1059e-07	AT1G28530
GlysoPI483463.13G119400	Gs13	26226016	26426016	3.1059e-07	AT5G55125
GlysoPI483463.13G119500	Gs13	26226016	26426016	3.1059e-07	AT5G46020
GlysoPI483463.13G119600	Gs13	26226016	26426016	3.1059e-07	AT3G20070
GlysoPI483463.13G119700	Gs13	26226016	26426016	3.1059e-07	AT1G79620
GlysoPI483463.13G119700	Gs13	26226016	26426016	3.1059e-07	AT5G49760
GlysoPI483463.13G119800	Gs13	26226016	26426016	3.1059e-07	AT1G28540
GlysoPI483463.13G119900	Gs13	26226016	26426016	3.1059e-07	AT5G60860
GlysoPI483463.13G120000	Gs13	26226016	26426016	3.1059e-07	AT5G45980
GlysoPI483463.13G120100	Gs13	26226016	26426016	3.1059e-07	AT3G11710
GlysoPI483463.13G120200	Gs13	26226016	26426016	3.1059e-07	AT5G09280
GlysoPI483463.13G120300	Gs13	26226016	26426016	3.1059e-07	AT2G18950
GlysoPI483463.13G120400	Gs13	26226016	26426016	3.1059e-07
GlysoPI483463.13G167500	Gs13	31800339	32000339	5.53839e-07	AT1G03220
GlysoPI483463.13G167600	Gs13	31800339	32000339	5.53839e-07	AT3G06120
GlysoPI483463.13G167700	Gs13	31800339	32000339	5.53839e-07	AT5G19090
GlysoPI483463.13G167800	Gs13	31800339	32000339	5.53839e-07	AT3G06140
GlysoPI483463.13G167900	Gs13	31800339	32000339	5.53839e-07	AT5G52210
GlysoPI483463.13G168000	Gs13	31800339	32000339	5.53839e-07	AT3G06145
GlysoPI483463.13G168100	Gs13	31800339	32000339	5.53839e-07	AT5G19070
GlysoPI483463.13G168200	Gs13	31800339	32000339	5.53839e-07	AT3G06150
GlysoPI483463.13G168300	Gs13	31800339	32000339	5.53839e-07	AT5G47550
GlysoPI483463.13G168400	Gs13	31800339	32000339	5.53839e-07	AT5G19040
GlysoPI483463.13G168500	Gs13	31800339	32000339	5.53839e-07	AT4G14230
GlysoPI483463.13G168600	Gs13	31800339	32000339	5.53839e-07	AT4G14240
GlysoPI483463.13G168700	Gs13	31800339	32000339	5.53839e-07	AT3G63088
GlysoPI483463.13G168800	Gs13	31800339	32000339	5.53839e-07	AT3G06170
GlysoPI483463.13G168900	Gs13	31800339	32000339	5.53839e-07	AT3G06180
GlysoPI483463.13G169000	Gs13	31800339	32000339	5.53839e-07	AT1G55230
GlysoPI483463.13G169100	Gs13	31800339	32000339	5.53839e-07	AT3G17265
GlysoPI483463.13G169200	Gs13	31800339	32000339	5.53839e-07
GlysoPI483463.13G169300	Gs13	31800339	32000339	5.53839e-07	AT3G23590
GlysoPI483463.13G308700	Gs13	44668745	44868745	1.21772e-08	AT1G04250
GlysoPI483463.13G308800	Gs13	44668745	44868745	1.21772e-08	AT1G80380
GlysoPI483463.13G308900	Gs13	44668745	44868745	1.21772e-08	AT1G80360
GlysoPI483463.13G309000	Gs13	44668745	44868745	1.21772e-08	AT1G15550
GlysoPI483463.13G309100	Gs13	44668745	44868745	1.21772e-08	AT1G15520
GlysoPI483463.13G309200	Gs13	44668745	44868745	1.21772e-08	AT1G15520
GlysoPI483463.13G309300	Gs13	44668745	44868745	1.21772e-08	AT1G15520
GlysoPI483463.13G309400	Gs13	44668745	44868745	1.21772e-08	AT1G15520
GlysoPI483463.13G309500	Gs13	44668745	44868745	1.21772e-08	AT3G15550
GlysoPI483463.13G309600	Gs13	44668745	44868745	1.21772e-08	AT3G15570
GlysoPI483463.13G309700	Gs13	44668745	44868745	1.21772e-08	AT1G80300
GlysoPI483463.13G309800	Gs13	44668745	44868745	1.21772e-08	AT1G80280
GlysoPI483463.13G309800	Gs13	44668745	44868745	1.21772e-08	AT1G15490
GlysoPI483463.13G309900	Gs13	44668745	44868745	1.21772e-08
GlysoPI483463.13G310000	Gs13	44668745	44868745	1.21772e-08	AT5G11470
GlysoPI483463.13G310100	Gs13	44668745	44868745	1.21772e-08	AT1G10490
GlysoPI483463.13G310200	Gs13	44668745	44868745	1.21772e-08	AT5G11420
GlysoPI483463.13G310300	Gs13	44668745	44868745	1.21772e-08	AT1G80230
GlysoPI483463.13G310400	Gs13	44668745	44868745	1.21772e-08	AT1G52700
GlysoPI483463.13G310500	Gs13	44668745	44868745	1.21772e-08	AT3G15660
GlysoPI483463.13G310600	Gs13	44668745	44868745	1.21772e-08	AT1G15420
GlysoPI483463.13G310700	Gs13	44668745	44868745	1.21772e-08	AT1G52690
GlysoPI483463.13G310800	Gs13	44668745	44868745	1.21772e-08	AT1G80210
GlysoPI483463.14G106400	Gs14	18929874	19129874	1.71347e-09	AT4G32630
GlysoPI483463.14G106500	Gs14	18929874	19129874	1.71347e-09	AT2G25680
GlysoPI483463.14G106600	Gs14	18929874	19129874	1.71347e-09	AT3G13560
GlysoPI483463.14G106700	Gs14	18929874	19129874	1.71347e-09
GlysoPI483463.14G110500	Gs14	20744597	20944597	2.20344e-08	AT4G31570
GlysoPI483463.14G110700	Gs14	20974326	21174326	1.02346e-09	AT4G31580
GlysoPI483463.14G117700	Gs14	28392059	28592059	6.52166e-09	AT1G77590
GlysoPI483463.14G117800	Gs14	28392059	28592059	6.52166e-09	AT1G21830
GlysoPI483463.14G117900	Gs14	28392059	28592059	6.52166e-09	AT3G26430
GlysoPI483463.14G118000	Gs14	28392059	28592059	6.52166e-09	AT3G26430
GlysoPI483463.14G118100	Gs14	28392059	28592059	6.52166e-09	AT1G67830
GlysoPI483463.14G118100	Gs14	28392059	28592059	6.52166e-09	AT3G26430
GlysoPI483463.14G123700	Gs14	31736992	31937120	4.50761e-12	AT3G49260
GlysoPI483463.14G126200	Gs14	34726425	34926427	1.37116e-13	AT2G05642
GlysoPI483463.14G126300	Gs14	34726425	34926427	1.37116e-13	AT1G77120
GlysoPI483463.14G126400	Gs14	34726425	34926427	1.37116e-13	AT1G43800
GlysoPI483463.14G126500	Gs14	34726425	34926427	1.37116e-13	AT4G10180
GlysoPI483463.14G126600	Gs14	34726425	34926427	1.37116e-13	AT1G43790
GlysoPI483463.14G127100	Gs14	35287417	35487417	5.14318e-08	AT1G77220
GlysoPI483463.14G127200	Gs14	35287417	35487417	5.14318e-08	AT1G21370
GlysoPI483463.15G054100	Gs15	4491475	4691475	6.31481e-08	AT2G22540
GlysoPI483463.15G054200	Gs15	4491475	4691475	6.31481e-08	AT2G22540
GlysoPI483463.15G054300	Gs15	4491475	4691475	6.31481e-08	AT4G33620
GlysoPI483463.15G054400	Gs15	4491475	4691475	6.31481e-08	AT2G14110
GlysoPI483463.15G054500	Gs15	4491475	4691475	6.31481e-08	AT4G38070
GlysoPI483463.15G054600	Gs15	4491475	4691475	6.31481e-08	AT5G64390
GlysoPI483463.15G054700	Gs15	4491475	4691475	6.31481e-08	AT4G33650
GlysoPI483463.15G054800	Gs15	4491475	4691475	6.31481e-08	AT5G17050
GlysoPI483463.15G054900	Gs15	4491475	4691475	6.31481e-08	AT2G14170
GlysoPI483463.15G055000	Gs15	4491475	4691475	6.31481e-08	AT4G31070
GlysoPI483463.15G055100	Gs15	4491475	4691475	6.31481e-08	AT1G18265
GlysoPI483463.15G055200	Gs15	4491475	4691475	6.31481e-08	AT5G10530
GlysoPI483463.15G055300	Gs15	4491475	4691475	6.31481e-08	AT5G14050
GlysoPI483463.15G055400	Gs15	4491475	4691475	6.31481e-08	AT1G72680
GlysoPI483463.15G055500	Gs15	4491475	4691475	6.31481e-08	AT4G37940
GlysoPI483463.15G055600	Gs15	4491475	4691475	6.31481e-08	AT5G64410
GlysoPI483463.15G055700	Gs15	4491475	4691475	6.31481e-08	AT5G64410
GlysoPI483463.15G055800	Gs15	4491475	4691475	6.31481e-08	AT5G09590
GlysoPI483463.15G055900	Gs15	4491475	4691475	6.31481e-08	AT2G04305
GlysoPI483463.15G056000	Gs15	4491475	4691475	6.31481e-08	AT5G64420
GlysoPI483463.15G056100	Gs15	4491475	4691475	6.31481e-08	AT5G65630
GlysoPI483463.15G056200	Gs15	4491475	4691475	6.31481e-08	AT1G06230
GlysoPI483463.15G169000	Gs15	20338757	20538757	1.70941e-08	AT1G56720
GlysoPI483463.15G169100	Gs15	20338757	20538757	1.70941e-08	AT3G29638
GlysoPI483463.15G169200	Gs15	20338757	20538757	1.70941e-08	AT1G59960
GlysoPI483463.15G169300	Gs15	20338757	20538757	1.70941e-08	AT2G36060
GlysoPI483463.15G175500	Gs15	24098777	24298777	6.72501e-11	AT1G32050
GlysoPI483463.15G175600	Gs15	24098777	24298777	6.72501e-11	AT4G39630
GlysoPI483463.15G175700	Gs15	24098777	24298777	6.72501e-11	AT3G22142
GlysoPI483463.15G189900	Gs15	38537179	38737361	5.38106e-09
GlysoPI483463.15G190000	Gs15	38537179	38737361	5.38106e-09	AT2G18990
GlysoPI483463.15G190100	Gs15	38537179	38737361	5.38106e-09
GlysoPI483463.15G207100	Gs15	47895350	48095488	2.55256e-07	AT3G14590
GlysoPI483463.15G207100	Gs15	47895350	48095488	2.55256e-07	AT1G53590
GlysoPI483463.15G207200	Gs15	47895350	48095488	2.55256e-07	AT3G14580
GlysoPI483463.15G207300	Gs15	47895350	48095488	2.55256e-07	AT3G14570
GlysoPI483463.15G207400	Gs15	47895350	48095488	2.55256e-07	AT1G61190
GlysoPI483463.15G207500	Gs15	47895350	48095488	2.55256e-07	AT1G64110
GlysoPI483463.15G207600	Gs15	47895350	48095488	2.55256e-07	AT1G12280
GlysoPI483463.15G207700	Gs15	47895350	48095488	2.55256e-07	AT4G27220
GlysoPI483463.15G207800	Gs15	47895350	48095488	2.55256e-07
GlysoPI483463.16G068400	Gs16	7981755	8181755	2.80951e-07	AT2G37410
GlysoPI483463.16G068500	Gs16	7981755	8181755	2.80951e-07	AT5G25930
GlysoPI483463.16G068600	Gs16	7981755	8181755	2.80951e-07	AT5G25930
GlysoPI483463.16G068700	Gs16	7981755	8181755	2.80951e-07	AT5G48385
GlysoPI483463.16G068800	Gs16	7981755	8181755	2.80951e-07	AT5G48380
GlysoPI483463.16G068900	Gs16	7981755	8181755	2.80951e-07	AT3G14460
GlysoPI483463.16G069000	Gs16	7981755	8181755	2.80951e-07	AT5G41761
GlysoPI483463.16G069100	Gs16	7981755	8181755	2.80951e-07	AT4G27950
GlysoPI483463.16G081000	Gs16	17862057	18062057	1.36945e-07	AT4G20310
GlysoPI483463.16G125500	Gs16	32312566	32512566	1.96481e-07	AT1G71850
GlysoPI483463.16G125600	Gs16	32312566	32512566	1.96481e-07	AT1G71870
GlysoPI483463.16G125700	Gs16	32312566	32512566	1.96481e-07	AT1G34300
GlysoPI483463.16G125800	Gs16	32312566	32512566	1.96481e-07	AT1G34300
GlysoPI483463.16G125900	Gs16	32312566	32512566	1.96481e-07	AT1G71865
GlysoPI483463.16G126000	Gs16	32312566	32512566	1.96481e-07	AT5G46090
GlysoPI483463.16G126100	Gs16	32312566	32512566	1.96481e-07	AT1G34220
GlysoPI483463.16G126200	Gs16	32312566	32512566	1.96481e-07	AT5G60340
GlysoPI483463.16G126300	Gs16	32312566	32512566	1.96481e-07	AT1G05680
GlysoPI483463.16G126400	Gs16	32312566	32512566	1.96481e-07	AT2G39210
GlysoPI483463.16G126500	Gs16	32312566	32512566	1.96481e-07	AT5G43140
GlysoPI483463.16G126600	Gs16	32312566	32512566	1.96481e-07	AT5G48100
GlysoPI483463.16G126700	Gs16	32312566	32512566	1.96481e-07	AT1G71810
GlysoPI483463.16G126800	Gs16	32312566	32512566	1.96481e-07	AT5G36930
GlysoPI483463.16G126900	Gs16	32312566	32512566	1.96481e-07	AT5G36930
GlysoPI483463.16G127000	Gs16	32312566	32512566	1.96481e-07	AT5G36930
GlysoPI483463.16G127100	Gs16	32312566	32512566	1.96481e-07	AT5G36930
GlysoPI483463.16G127200	Gs16	32312566	32512566	1.96481e-07	AT5G36930
GlysoPI483463.16G127300	Gs16	32312566	32512566	1.96481e-07	AT5G17680
GlysoPI483463.16G127400	Gs16	32312566	32512566	1.96481e-07	AT4G02450
GlysoPI483463.16G127500	Gs16	32312566	32512566	1.96481e-07	AT1G22730
GlysoPI483463.16G127600	Gs16	32312566	32512566	1.96481e-07	AT1G71780
GlysoPI483463.16G127700	Gs16	32312566	32512566	1.96481e-07	AT1G62670
GlysoPI483463.17G006900	Gs17	632092	832092	2.21249e-08	AT4G17230
GlysoPI483463.17G007000	Gs17	632092	832092	2.21249e-08	AT4G16490
GlysoPI483463.17G007100	Gs17	632092	832092	2.21249e-08	AT5G47530
GlysoPI483463.17G007200	Gs17	632092	832092	2.21249e-08	AT5G47540
GlysoPI483463.17G007300	Gs17	632092	832092	2.21249e-08	AT4G12560
GlysoPI483463.17G007400	Gs17	632092	832092	2.21249e-08	AT4G12570
GlysoPI483463.17G007500	Gs17	632092	832092	2.21249e-08
GlysoPI483463.17G007600	Gs17	632092	832092	2.21249e-08	AT4G22360
GlysoPI483463.17G007700	Gs17	632092	832092	2.21249e-08	AT5G20130
GlysoPI483463.17G007800	Gs17	632092	832092	2.21249e-08	AT3G07880
GlysoPI483463.17G007900	Gs17	632092	832092	2.21249e-08
GlysoPI483463.17G008000	Gs17	632092	832092	2.21249e-08	AT4G22330
GlysoPI483463.17G008100	Gs17	632092	832092	2.21249e-08	AT4G22300
GlysoPI483463.17G008200	Gs17	632092	832092	2.21249e-08	AT1G12020
GlysoPI483463.17G008300	Gs17	632092	832092	2.21249e-08	AT1G62400
GlysoPI483463.17G008400	Gs17	632092	832092	2.21249e-08	AT4G05530
GlysoPI483463.17G008500	Gs17	632092	832092	2.21249e-08	AT4G05520
GlysoPI483463.17G008600	Gs17	632092	832092	2.21249e-08	AT3G25070
GlysoPI483463.17G008700	Gs17	632092	832092	2.21249e-08	AT1G62390
GlysoPI483463.17G008800	Gs17	632092	832092	2.21249e-08	AT1G05010
GlysoPI483463.17G008900	Gs17	632092	832092	2.21249e-08	AT4G03965
GlysoPI483463.17G009000	Gs17	632092	832092	2.21249e-08	AT2G30400
GlysoPI483463.17G009100	Gs17	632092	832092	2.21249e-08	AT1G12000
GlysoPI483463.17G009200	Gs17	632092	832092	2.21249e-08	AT1G62360
GlysoPI483463.18G061800	Gs18	6391862	6591883	3.68037e-07
GlysoPI483463.18G061900	Gs18	6391862	6591883	3.68037e-07	AT3G30842
GlysoPI483463.18G062000	Gs18	6391862	6591883	3.68037e-07	AT3G07040
GlysoPI483463.18G062100	Gs18	6391862	6591883	3.68037e-07	AT3G07040
GlysoPI483463.18G062200	Gs18	6391862	6591883	3.68037e-07	AT3G04580
GlysoPI483463.18G062300	Gs18	6391862	6591883	3.68037e-07
GlysoPI483463.18G062400	Gs18	6391862	6591883	3.68037e-07
GlysoPI483463.18G062500	Gs18	6391862	6591883	3.68037e-07
GlysoPI483463.18G062600	Gs18	6391862	6591883	3.68037e-07
GlysoPI483463.18G062700	Gs18	6391862	6591883	3.68037e-07	AT1G07380
GlysoPI483463.18G062800	Gs18	6391862	6591883	3.68037e-07	AT3G04580
GlysoPI483463.18G062900	Gs18	6391862	6591883	3.68037e-07
GlysoPI483463.18G063000	Gs18	6391862	6591883	3.68037e-07
GlysoPI483463.18G083200	Gs18	9648897	9848897	2.09922e-07	AT1G09157
GlysoPI483463.18G083300	Gs18	9648897	9848897	2.09922e-07	AT5G36210
GlysoPI483463.18G083400	Gs18	9648897	9848897	2.09922e-07
GlysoPI483463.18G083500	Gs18	9648897	9848897	2.09922e-07	AT1G11660
GlysoPI483463.18G083600	Gs18	9648897	9848897	2.09922e-07	AT5G54930
GlysoPI483463.18G083700	Gs18	9648897	9848897	2.09922e-07	AT4G26990
GlysoPI483463.18G088200	Gs18	11311746	11511768	1.37393e-07
GlysoPI483463.18G088300	Gs18	11311746	11511768	1.37393e-07	AT1G78570
GlysoPI483463.18G088400	Gs18	11311746	11511768	1.37393e-07	AT2G42840
GlysoPI483463.18G088500	Gs18	11311746	11511768	1.37393e-07	AT4G14130
GlysoPI483463.18G088600	Gs18	11311746	11511768	1.37393e-07	AT3G58840
GlysoPI483463.18G088700	Gs18	11311746	11511768	1.37393e-07	AT2G42880
GlysoPI483463.18G088800	Gs18	11311746	11511768	1.37393e-07	AT1G29400
GlysoPI483463.18G088900	Gs18	11311746	11511768	1.37393e-07	AT2G42910
GlysoPI483463.18G089000	Gs18	11311746	11511768	1.37393e-07	AT1G06520
GlysoPI483463.18G089100	Gs18	11311746	11511768	1.37393e-07	AT4G17310
GlysoPI483463.18G090100	Gs18	11735883	11935929	4.93098e-08	AT1G04920
GlysoPI483463.18G090200	Gs18	11735883	11935929	4.93098e-08	AT4G26900
GlysoPI483463.18G090300	Gs18	11735883	11935929	4.93098e-08
GlysoPI483463.18G090400	Gs18	11735883	11935929	4.93098e-08	AT5G50890
GlysoPI483463.18G103100	Gs18	17352943	17553127	3.96836e-09	AT1G27200
GlysoPI483463.18G103200	Gs18	17352943	17553127	3.96836e-09	AT1G03750
GlysoPI483463.18G103300	Gs18	17352943	17553127	3.96836e-09	AT1G24190
GlysoPI483463.18G111800	Gs18	22600588	22800588	3.10756e-07	AT2G34440
GlysoPI483463.18G111900	Gs18	22600588	22800588	3.10756e-07	AT1G70620
GlysoPI483463.18G131500	Gs18	40702294	41003728	6.89367e-08	AT5G46550
GlysoPI483463.18G131600	Gs18	40702294	41003728	6.89367e-08	AT5G46550
GlysoPI483463.18G131700	Gs18	40702294	41003728	6.89367e-08	AT5G46550
GlysoPI483463.18G131800	Gs18	40702294	41003728	6.89367e-08	AT5G46550
GlysoPI483463.18G131900	Gs18	40702294	41003728	6.89367e-08	AT3G24715
GlysoPI483463.18G132000	Gs18	40702294	41003728	6.89367e-08	AT5G48890
GlysoPI483463.18G132100	Gs18	40702294	41003728	6.89367e-08	AT4G30480
GlysoPI483463.18G146900	Gs18	46541846	46741846	6.82769e-07
GlysoPI483463.18G147000	Gs18	46541846	46741846	6.82769e-07	AT3G09060
GlysoPI483463.18G147100	Gs18	46541846	46741846	6.82769e-07	AT3G09050
GlysoPI483463.18G147200	Gs18	46541846	46741846	6.82769e-07	AT2G38080
GlysoPI483463.18G147300	Gs18	46541846	46741846	6.82769e-07	AT2G38090
GlysoPI483463.18G147400	Gs18	46541846	46741846	6.82769e-07	AT5G01220
GlysoPI483463.18G147500	Gs18	46541846	46741846	6.82769e-07	AT3G09032
GlysoPI483463.18G147600	Gs18	46541846	46741846	6.82769e-07	AT2G38110
GlysoPI483463.18G147700	Gs18	46765182	46965182	6.78308e-09	AT4G08850
GlysoPI483463.18G147800	Gs18	46765182	46965182	6.78308e-09	AT4G00430
GlysoPI483463.18G147900	Gs18	46765182	46965182	6.78308e-09	AT2G38120
GlysoPI483463.18G148000	Gs18	46765182	46965182	6.78308e-09	AT4G28010
GlysoPI483463.18G148100	Gs18	46765182	46965182	6.78308e-09
GlysoPI483463.18G169700	Gs18	50283734	50483734	1.57284e-09	AT2G45550
GlysoPI483463.18G169800	Gs18	50283734	50483734	1.57284e-09	AT3G61040
GlysoPI483463.18G169900	Gs18	50283734	50483734	1.57284e-09	AT2G45550
GlysoPI483463.18G170000	Gs18	50283734	50483734	1.57284e-09	AT2G45540
GlysoPI483463.18G170100	Gs18	50283734	50483734	1.57284e-09	AT3G18030
GlysoPI483463.18G170200	Gs18	50283734	50483734	1.57284e-09	AT3G18030
GlysoPI483463.18G170300	Gs18	50283734	50483734	1.57284e-09	AT3G18030
GlysoPI483463.18G170400	Gs18	50283734	50483734	1.57284e-09	AT1G48605
GlysoPI483463.18G170500	Gs18	50283734	50483734	1.57284e-09	AT1G08500
GlysoPI483463.18G170600	Gs18	50283734	50483734	1.57284e-09	AT3G61050
GlysoPI483463.19G084400	Gs19	36449102	36649102	7.52626e-07	AT3G03740
GlysoPI483463.19G084500	Gs19	36449102	36649102	7.52626e-07	AT1G58030
GlysoPI483463.19G084600	Gs19	36449102	36649102	7.52626e-07	AT1G58030
GlysoPI483463.19G084700	Gs19	36449102	36649102	7.52626e-07	AT1G80750
GlysoPI483463.19G084800	Gs19	36449102	36649102	7.52626e-07	AT3G03710
GlysoPI483463.19G084900	Gs19	36449102	36649102	7.52626e-07	AT2G44440
GlysoPI483463.19G085000	Gs19	36449102	36649102	7.52626e-07	AT5G17860
GlysoPI483463.19G085100	Gs19	36449102	36649102	7.52626e-07	AT5G17850
GlysoPI483463.19G085200	Gs19	36449102	36649102	7.52626e-07	AT5G17840
GlysoPI483463.19G085300	Gs19	36449102	36649102	7.52626e-07	AT3G03700
GlysoPI483463.19G085300	Gs19	36449102	36649102	7.52626e-07	AT3G04440
GlysoPI483463.19G085400	Gs19	36449102	36649102	7.52626e-07	AT2G40720
GlysoPI483463.19G085500	Gs19	36449102	36649102	7.52626e-07	AT3G03690
GlysoPI483463.19G085600	Gs19	36449102	36649102	7.52626e-07	AT3G09360
GlysoPI483463.19G180000	Gs19	46578523	46778523	1.40314e-06	AT2G47180
GlysoPI483463.19G180100	Gs19	46578523	46778523	1.40314e-06	AT1G10630
GlysoPI483463.19G180200	Gs19	46578523	46778523	1.40314e-06	AT3G62270
GlysoPI483463.19G180300	Gs19	46578523	46778523	1.40314e-06	AT1G02450
GlysoPI483463.19G180400	Gs19	46578523	46778523	1.40314e-06	AT1G02460
GlysoPI483463.19G180500	Gs19	46578523	46778523	1.40314e-06	AT2G47140
GlysoPI483463.19G180600	Gs19	46578523	46778523	1.40314e-06	AT2G47115
GlysoPI483463.19G180700	Gs19	46578523	46778523	1.40314e-06	AT3G62240
GlysoPI483463.19G180800	Gs19	46578523	46778523	1.40314e-06	AT4G01860
GlysoPI483463.19G180900	Gs19	46578523	46778523	1.40314e-06	AT4G01850
GlysoPI483463.19G181000	Gs19	46578523	46778523	1.40314e-06	AT3G62220
GlysoPI483463.19G181100	Gs19	46578523	46778523	1.40314e-06	AT3G17430
GlysoPI483463.19G181200	Gs19	46578523	46778523	1.40314e-06	AT5G27870
GlysoPI483463.19G181300	Gs19	46578523	46778523	1.40314e-06	AT2G47020
GlysoPI483463.19G181400	Gs19	46578523	46778523	1.40314e-06	AT1G75250
GlysoPI483463.19G181500	Gs19	46578523	46778523	1.40314e-06	AT4G02750
GlysoPI483463.19G181600	Gs19	46578523	46778523	1.40314e-06	AT4G01840
GlysoPI483463.19G181700	Gs19	46578523	46778523	1.40314e-06	AT3G62160
GlysoPI483463.19G181800	Gs19	46578523	46778523	1.40314e-06	AT3G62140
GlysoPI483463.19G181900	Gs19	46578523	46778523	1.40314e-06	AT4G01810
GlysoPI483463.19G182000	Gs19	46578523	46778523	1.40314e-06	AT3G62120
GlysoPI483463.20G043100	Gs20	19593302	19793349	8.56156e-11	AT3G07740
GlysoPI483463.20G053200	Gs20	29474274	29674274	7.15418e-08	AT5G20230
GlysoPI483463.20G053300	Gs20	29474274	29674274	7.15418e-08
GlysoPI483463.20G061300	Gs20	33587996	33787996	6.33195e-09	AT4G14410
GlysoPI483463.20G061400	Gs20	33587996	33787996	6.33195e-09	AT1G04360
GlysoPI483463.20G061500	Gs20	33587996	33787996	6.33195e-09	AT4G01630
GlysoPI483463.20G061600	Gs20	33587996	33787996	6.33195e-09	AT5G03050
GlysoPI483463.20G061700	Gs20	33587996	33787996	6.33195e-09	AT3G62010
GlysoPI483463.20G061800	Gs20	33587996	33787996	6.33195e-09	AT5G15610
GlysoPI483463.20G061900	Gs20	33587996	33787996	6.33195e-09	AT5G03560
GlysoPI483463.20G062000	Gs20	33587996	33787996	6.33195e-09	AT5G26742
